# Supplementary material for: Photoinduced synthesis of functionalized oxetanes via diradical-mediated ring contraction
Source: Royal Society of Chemistry journal article supplement (doi:10.1039/d2gc01362b), 2022-01-01

## Supporting information

### Photoinduced synthesis of functionalized oxetanes via diradical-mediated ring contraction

Dan Qi,<sup>a</sup> Jinrui Bai,<sup>a</sup> Haoxiang Zhang,<sup>a</sup> Bin Li,<sup>a</sup> Zhuoheng Song,<sup>a</sup> Na Ma,<sup>a</sup> Lin Guo,<sup>a,\*</sup>  
Lijuan Song<sup>a,b,\*</sup> and Wujiong Xia<sup>a,c,\*</sup>

<sup>a</sup> *State Key Lab of Urban Water Resource and Environment, School of Science, Harbin Institute of Technology (Shenzhen), Shenzhen, 518055, China*

<sup>b</sup> *School of Science, Harbin Institute of Technology, Shenzhen, 518055, China Shenzhen Bay Laboratory, Shenzhen, 518055, China. financial support : Harbin Institute of Technology (Shenzhen) (Talent Development Starting Fund from Shenzhen Government)*

<sup>c</sup> *School of Chemistry and Chemical Engineering, Henan Normal University, Xinxiang, Henan 453007, China*

Email: [guolin@hit.edu.cn](mailto:guolin@hit.edu.cn); [songlijuan@hit.edu.cn](mailto:songlijuan@hit.edu.cn); [xiawj@hit.edu.cn](mailto:xiawj@hit.edu.cn)

### Table of Contents

|                                 |    |
|---------------------------------|----|
| General information             | S2 |
| Important Safety Note           | S3 |
| Synthesis of starting materials | S3 |
| Reaction Optimization           | S5 |

|                                                                 |     |
|-----------------------------------------------------------------|-----|
| DFT Calculations                                                | S10 |
| Computed Energies of All Stationary Points                      | S12 |
| Characterization Data of Products                               | S35 |
| Reference                                                       | S48 |
| <sup>1</sup> H NMR and <sup>13</sup> C NMR Spectra for Products | S49 |

## General information

Unless otherwise noted, all commercially available compounds were used as provided without further purification. Solvents were dried and purified according to the procedure from “Purification of Laboratory Chemicals book”. Column chromatography was performed using silica gel. Reactions were monitored by TLC and visualized by UV lamp (254 nm) and stained with ethanolic solution of concentrated potassium permanganate. Yields generally referred to chromatographically isolated yields, unless otherwise noted. <sup>1</sup>H NMR (400 MHz), <sup>13</sup>C NMR (101 MHz) and <sup>19</sup>F NMR (376 MHz) spectra are recorded on a Bruker AV-400 spectrometer in CDCl<sub>3</sub> with TMS as internal standard. For <sup>1</sup>H NMR (400 MHz), CDCl<sub>3</sub> ( $\delta = 7.26$  ppm) served as internal standard and data are reported as follows: chemical shift (in ppm), multiplicity (s = singlet, d = doublet, t = triplet, q = quartet, m = multiplet, brs = broad singlet), coupling constant (in Hz), and integration. GC-MS analysis was performed on 7890A-5975C/Agilent. HR-MS spectra were recorded on a Waters Xevo G2QTOF/UPLC mass spectrometer using TOF as the mass analyzer type. The photoreaction instrument (WPP-TEC-1020SL) was purchased from WATTCAS, China.

## SPECTROPHOTOCOLORMETER ANALYSIS REPORT

---

### Color Parameters:

CIE(1931:) x=0.1776 y=0.0296

CIE(1960:) u=0.2367 v=0.0592

CIE (1976:) u'=0.2367 v'=0.0888

**Color Temperature:**  $T_c=25000\text{K}$  Dominant Wave:  $WL.D=435.20\text{nm}$  Purity:  $PUR=93.54$

Peak Wave:  $WL.P=392.5\text{nm}$  Delta Wave:  $WL.H=18.0\text{nm}$

Color Tolerance:  $SDCM=186.7$   $R_a:R_a=15.0$

$CRI_1=56.1$   $CRI_2=16.3$   $CRI_3=0.0$   $CRI_4=0.0$   $CRI_5=47.6$

$CRI_6=0.0$   $CRI_7=0.0$   $CRI_8=0.0$   $CRI_9=0.0$   $CRI_{10}=0.0$

$CRI_{11}=0.0$   $CRI_{12}=0.0$   $CRI_{13}=42.0$   $CRI_{14}=6.3$   $CRI_{15}=66.7$

**Photology Parameters:**

Lum Flux:  $\Phi(lm)=4.75lm$  Optical Power:  $\Phi_e(mW)=2769.6mW$   $\eta(lm/W)=0.4lm/W$

**Electric Parameters:**

Forward Voltage:  $V_F = 22.68\text{ V}$  Forward Current:  $I_F = 498.9\text{ mA}$  Power =  $11.32\text{ W}$

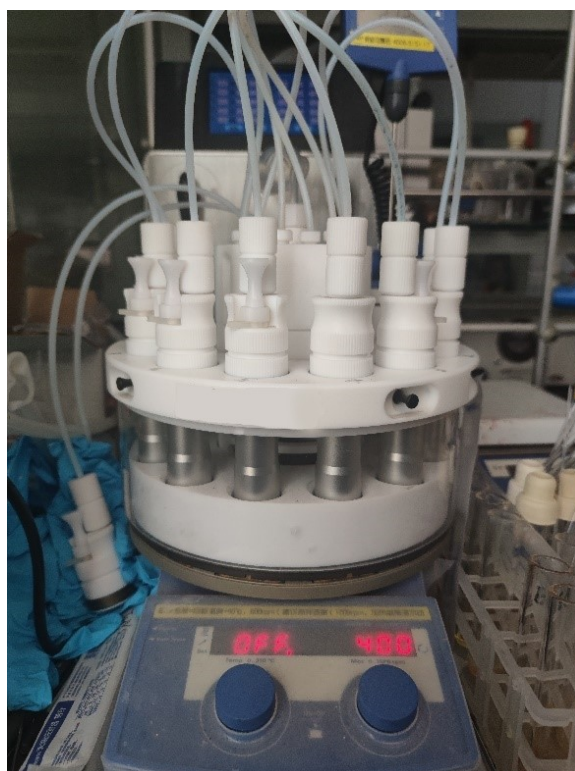

**Figure S1.** Photoreactor for photoreaction

## Important Safety Note

Handling of diazo compounds should only be done in a well-ventilated fume cupboard using an additional blast shield. No incidents occurred handling of diazoalkanes during the preparation of this manuscript, yet the reader should be aware of carcinogenicity and explosiveness of the herein described diazo compounds. General safety precautions when working with diazomethane and its derivatives should be followed. Any reactions described in this manuscript should not be performed without strict risk assessment and proper safety precautions.

## Synthesis of starting materials

### Synthesis of diazoacetates 1a-1x<sup>1</sup>

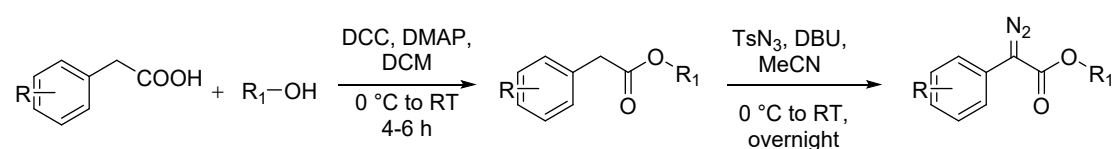

Step-I: To a stirred, ice cooled solution of the phenylacetic acid derivatives (10 mmol, 1 equiv.), and alcohol (12 mmol, 1.2 equiv.) in 20 mL DCM was added a solution of DCC (13 mmol, 1.3 equiv.) and DMAP (1 mmol, 0.1 equiv.) in 10 mL DCM at once. The solution was stirred 4-6 h while slowly warming up to room temperature. After finishing the reaction, the solid was filtered off and washed with Et<sub>2</sub>O. The solvent was evaporated, and the residue was purified by silica gel column chromatography (pentane : ethyl acetate = 20:1) provided the desired ester.

Step-II: To a stirred, ice cooled solution of the ester (5 mmol, 1 equiv.) and p-Tosyl azide (5.5 mmol, 1.1 equiv.) in 10 mL MeCN were added DBU (7 mmol, 1.4 equiv.) dropwise. The solution was stirred over night while slowly warming up to room temperature. DCM was added, and the organic layer was washed two times with sat. aq. NH<sub>4</sub>Cl solution. The organic layer was dried over MgSO<sub>4</sub> and the solvent was removed in vacuum. The crude product was purified by silica gel column chromatography using (pentane : ethyl acetate = 10:1) provided the desired diazo compound as a orange oil.

### Synthesis of furan 2e-2g<sup>2</sup>

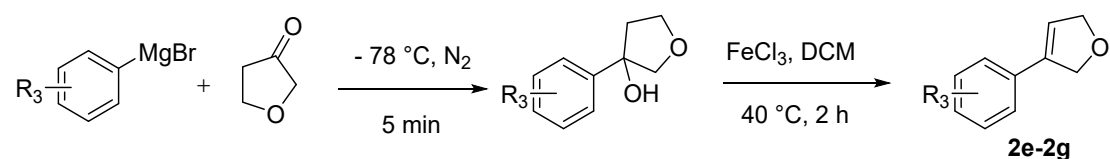

Step-I: In a dry round bottomed flask, dihydrofuran-3(2*H*)-one (2 mL, 10.0 mmol) was added dropwise to Grignard (1.0 M in THF, 5.0 mL, 12.0 mmol). Following a further 5 min at  $-78\text{ }^{\circ}\text{C}$  the reaction mixture was warmed to rt and water (50 mL) was added. The layers were separated and the aqueous portion extracted with diethylether ( $3 \times 50\text{ mL}$ ). The organic extracts were combined, washed with brine, dried over  $\text{Na}_2\text{SO}_4$ , filtered and concentrated in vacuo. Purification by flash column chromatography ( $\text{Et}_2\text{O} : \text{pentane} = 3 : 2$ ) afforded tetrahydrofuran-3-ol as a clear oil.  $R_f = 0.26$ .

Step-II:  $\text{FeCl}_3$  (0.125 mmol) was added to a solution of tetrahydrofuranol (2.5 mmol) in dichloromethane (5 mL). The reaction mixture was stirred at  $40\text{ }^{\circ}\text{C}$  for 2 h then sat. aq.  $\text{NaHCO}_3$  (15 mL) was added followed by dichloromethane (15 mL). The layers were separated and the aqueous portion was extracted with dichloromethane ( $2 \times 15\text{ mL}$ ). The organic extracts were combined, dried over  $\text{Na}_2\text{SO}_4$ , filtered and concentrated in vacuo. Purification by flash column chromatography ( $\text{Et}_2\text{O} : \text{pentane} = 5 : 1$ ) afforded dihydrofuran as a yellow solid.  $R_f = 0.50$ .

## Reaction Optimization

Table S1. Solvent optimization<sup>a</sup>

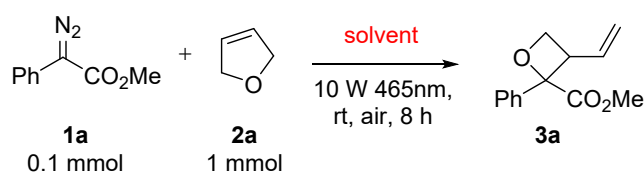

| Entry | solvent               | Yield(%) |
|-------|-----------------------|----------|
| 1     | $\text{CHCl}_3$       | 70       |
| 2     | DCM                   | 55       |
| 3     | MeCN                  | trace    |
| 4     | EA                    | trace    |
| 5     | $\text{Et}_2\text{O}$ | trace    |

|    |         |       |
|----|---------|-------|
| 6  | DMSO    | trace |
| 7  | DMF     | n.r.  |
| 8  | MeOH    | n.r.  |
| 9  | PhMe    | trace |
| 10 | acetone | trace |

<sup>a</sup> Yields of isolated products.

**Table S2. LEDs irradiation optimization<sup>a</sup>**

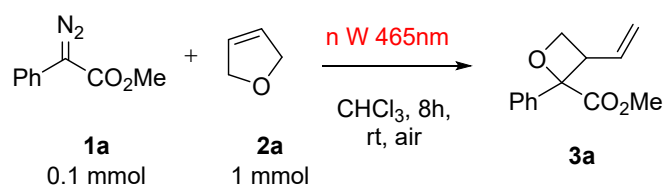

| Entry | n W | Yield(%) |
|-------|-----|----------|
| 1     | 1   | 33       |
| 2     | 2   | 39       |
| 3     | 3   | 41       |
| 4     | 4   | 49       |
| 5     | 5   | 70       |
| 6     | 6   | 40       |
| 7     | 7   | 38       |
| 8     | 8   | 39       |
| 9     | 9   | 37       |
| 10    | 10  | 30       |

<sup>a</sup> Yields of isolated products.

**Table S3. Ratio of 1a:2a optimization<sup>a</sup>**

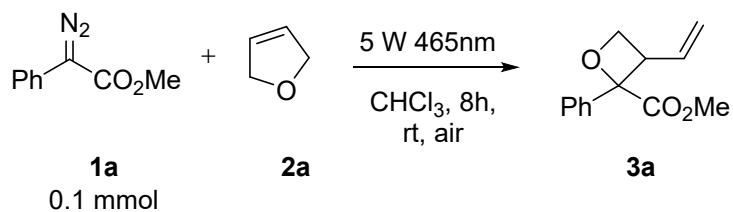

| Entry | Ratio(1a:2a) | Yield(%) |
|-------|--------------|----------|
| 1     | 1:1          | <5       |
| 2     | 1:2          | <10      |
| 3     | 1:5          | 40       |
| 4     | 1:10         | 70       |
| 5     | 1:15         | 42       |

<sup>a</sup> Yields of isolated products.

**Table S4. Reaction time optimization<sup>a</sup>**

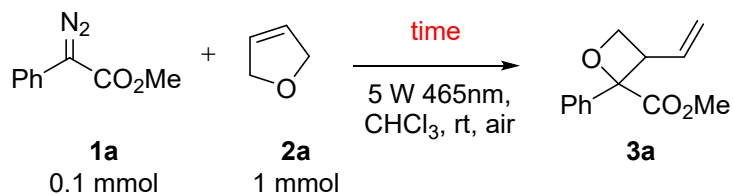

| Entry | Time | Yield(%) |
|-------|------|----------|
| 1     | 1    | 57       |
| 2     | 2    | 55       |
| 3     | 3    | 79       |
| 4     | 4    | 92       |
| 5     | 5    | 79       |
| 6     | 6    | 75       |
| 7     | 7    | 74       |
| 8     | 8    | 70       |

<sup>a</sup> Yields of isolated products.

**Table S5. Additive optimization<sup>a</sup>**

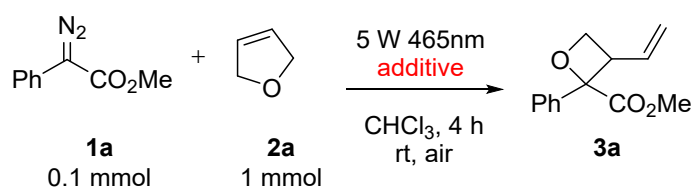

| Entry | additive                        | Yield(%) |
|-------|---------------------------------|----------|
| 1     | KH <sub>2</sub> PO <sub>4</sub> | 64       |
| 2     | NH <sub>4</sub> Cl              | 68       |
| 3     | FeCl <sub>3</sub>               | trace    |
| 4     | AgBF <sub>4</sub>               | trace    |
| 5     | NaHCO <sub>3</sub>              | 71       |
| 6     | DABCO                           | 55       |
| 7     | Li <sub>2</sub> CO <sub>3</sub> | 67       |
| 8     | K <sub>3</sub> PO <sub>4</sub>  | 60       |

<sup>a</sup> Yields of isolated products.

**General procedure for the multicomponent synthesis of vinyloxetane**

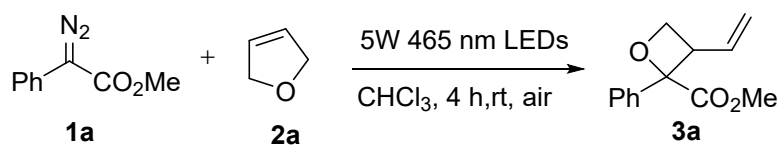

An oven dried 50 mL reaction vial was charged with a stir bar. Substrate **1a** (0.1 mmol, 1 eq), **2a** (1 mmol, 10 eq) was added with 1 mL CHCl<sub>3</sub>. The reaction mixture was stirred and irradiated with 5 W blue LEDs lamp (WATTCAS : WPTEC-1020SL) for 4 hours until the reaction was



completed(monitored by TLC). After reaction, the solvent was removed by rotary evaporation. Purified by flash column chromatography on silica gel(petroleum ether: ethyl acetate = 10:1) afforded vinyloxetane as a yellow oil liquid.  $R_f=0.2$

#### General procedure for the gram-scale flow reaction

An oven dried 250 mL erlenmeyer flask was charged with a stir bar. Substrate **1a** (1.0 g, 5.7 mmol, 1 eq), **2a** (4 g, 57 mmol, 10 eq) was added with 20 mL  $\text{CHCl}_3$ .The reaction mixture was stirred and irradiated with commercially available blue light bulbs and flow pump for 4 hours. After reaction, the solvent was removed by rotary evaporation. Purified by flash column chromatography on silica gel(petroleum ether: ethyl acetate = 10:1) afforded vinyloxetane(0.66g, 54% yield) as a colorless oil.  $R_f=0.2$

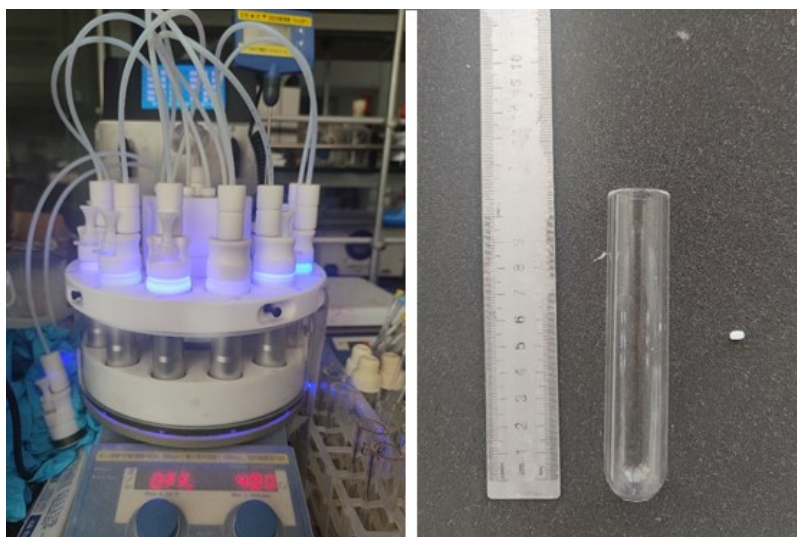

**Figure S2.** Reaction setup for general photoreactions

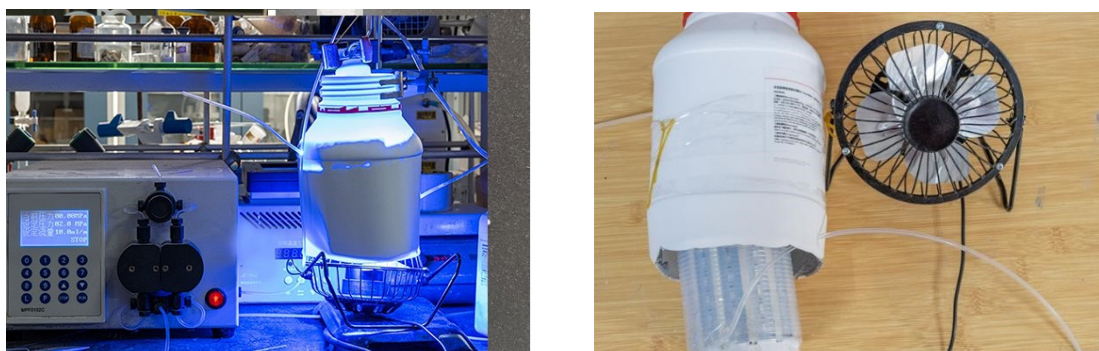

**Figure S3.** Flow reactor of photoreactions

#### UV-vis absorbance spectra of diazoacetates 1

Before the quenching experiments, the emission spectrum of methyl 2-diazo-2-phenylacetate (0.002 mM in CHCl<sub>3</sub>, 1 mL) was measured after added 2 mL CHCl<sub>3</sub> to serve as the background experiment, in which the emission maximum  $\lambda_{\text{max}}$  was determined at 430 nm (Figure S4).

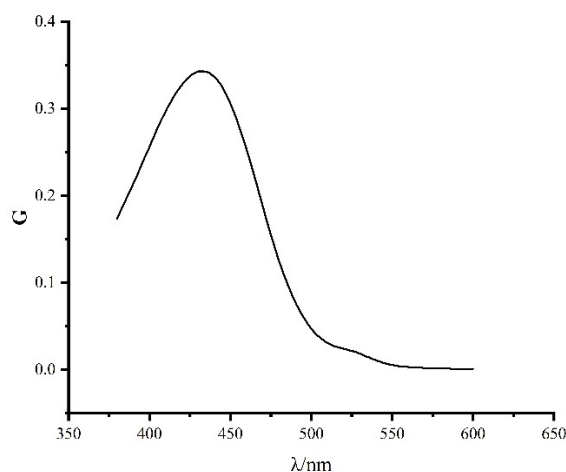

**Figure S4.** Emission spectrum of methyl 2-diazo-2-phenylacetate. Concentration =  $6.67 \times 10^{-4}$  mM (0.002/3 mM)

### Control experiments

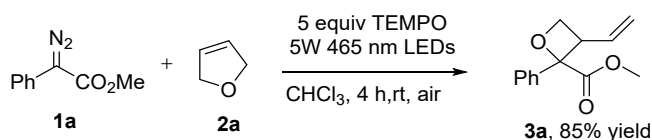

An oven dried 50 mL reaction vial was charged with a stir bar. Substrate **1a** (0.1 mmol, 1 eq), **2a** (1 mmol, 10 eq), TEMPO (0.5 mmol, 5 eq) was added with 1 mL CHCl<sub>3</sub>. The reaction mixture was stirred and irradiated with 5 W blue LEDs lamp (WATTCAS : WPTEC-1020SL) for 4 hours until the reaction was completed (monitored by TLC). After reaction, the solvent was removed by rotary evaporation. Purified by flash column chromatography on silica gel (petroleum ether: ethyl acetate = 10:1) afforded vinyloxetane (85% yield) as a colorless oil.

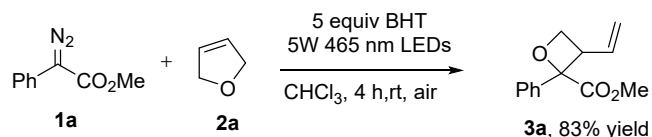

An oven dried 50 mL reaction vial was charged with a stir bar. Substrate **1a** (0.1 mmol, 1 eq), **2a** (1 mmol, 10 eq), BHT (0.5 mmol, 5 eq) was added with 1 mL CHCl<sub>3</sub>. The reaction mixture was stirred and irradiated with 5 W blue LEDs lamp (WATTCAS : WPTEC-1020SL) for 4 hours until the reaction was completed (monitored by TLC). After reaction, the solvent was removed by rotary

evaporation. Purified by flash column chromatography on silica gel (petroleum ether: ethyl acetate = 10:1) afforded vinyloxetane (83% yield) as a colorless oil.

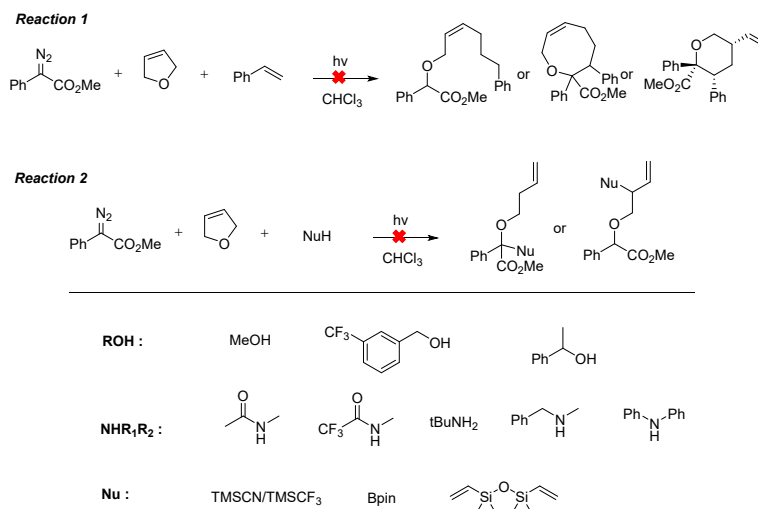

An oven dried 50 mL reaction vial was charged with a stir bar. Substrate **1a** (0.1 mmol, 1 eq), **2a** (1 mmol, 10 eq), nucleophile (0.12 mmol, 1.2 eq) was added with 1 mL CHCl<sub>3</sub>. The reaction mixture was stirred and irradiated with 5 W blue LEDs lamp (WATTCAS : WPTEC-1020SL) for 4 hours until the reaction was completed (monitored by TLC). After reaction, the solvent was removed by rotary evaporation. Target product cannot be obtained.

## DFT Calculations

### Computational Details and Discussion

All the calculations were performed with the Gaussian 16 program.<sup>3</sup> DFT Method (U)B3LYP with a standard basis set 6-31G(d)<sup>4,5</sup> were applied for the optimization of all structures. Frequency calculations were performed to confirm that each stationary point is either a minimum or a transition structure. Key transition-state structures were confirmed to connect corresponding reactants and products by intrinsic reaction coordinate (IRC) calculations. single-point energies calculations in the chloroform were computed at the (U)B3LYP level of theory with the 6-311+G(d,p) basis set in the chloroform with SMD solvation model.<sup>6</sup> Singlet diradical intermediates and transition states were located with UB3LYP/6-31G(d), where the keyword guess=mix was used. Gibbs free energies in solution were used in the paper.

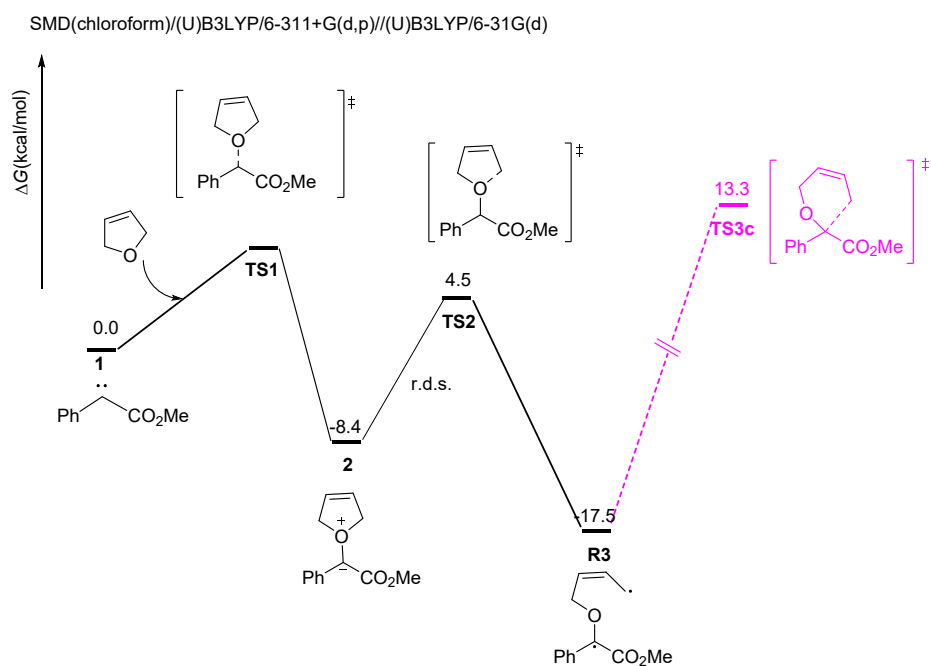

**Figure S5.** Free energy profiles for the concerted rearrangement process.

We have considered the selectivity for the products and the corresponding DFT calculation results are shown in Figure S5. These similar ring expansion processes involve the ylide formation, homolytic cleavage of C-O bond, rearrangement and intramolecular radical-radical coupling.

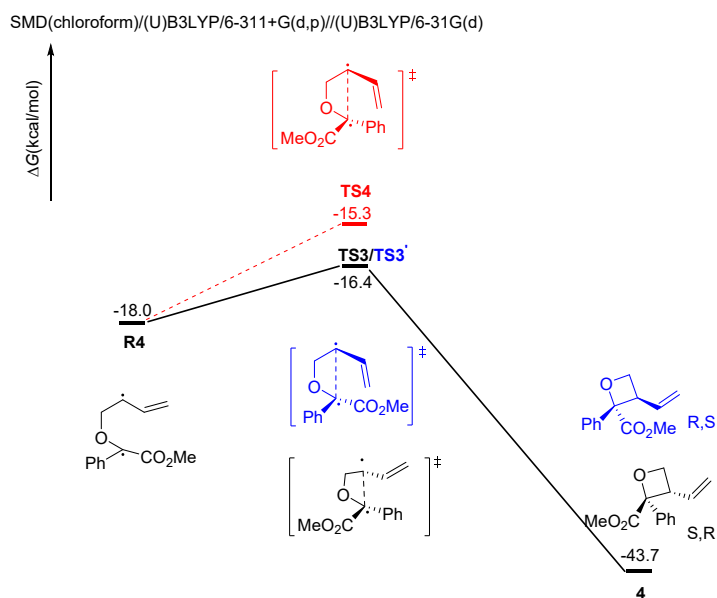

**Figure S6.** The stereoselective step.

Furthermore, we have computed several other substrates (Figure S7), e.g., naphthyl substituted carbene and 5,6-dihydro-2H-pyran. The low energy barrier of naphthyl substituted carbene (13.0

kcal mol<sup>-1</sup>) and high energy barrier of 5,6-dihydro-2H-pyran (33.0 kcal mol<sup>-1</sup>) in the rate-determining step is consistent with the observed reactivity in experiment.

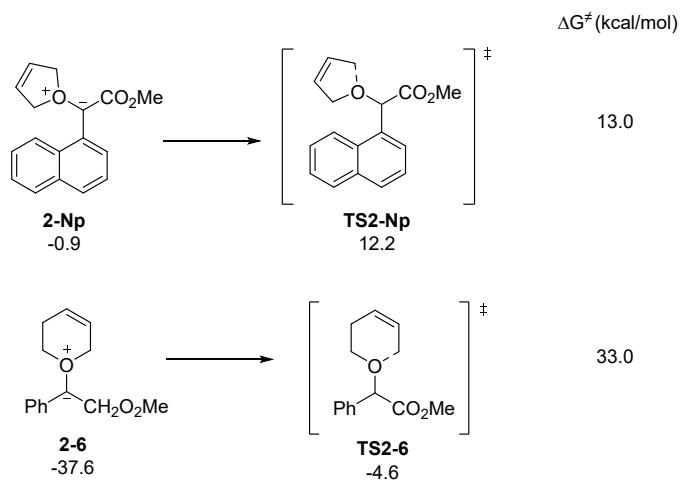

**Figure S7.** Computed energy barrier for other substrates.

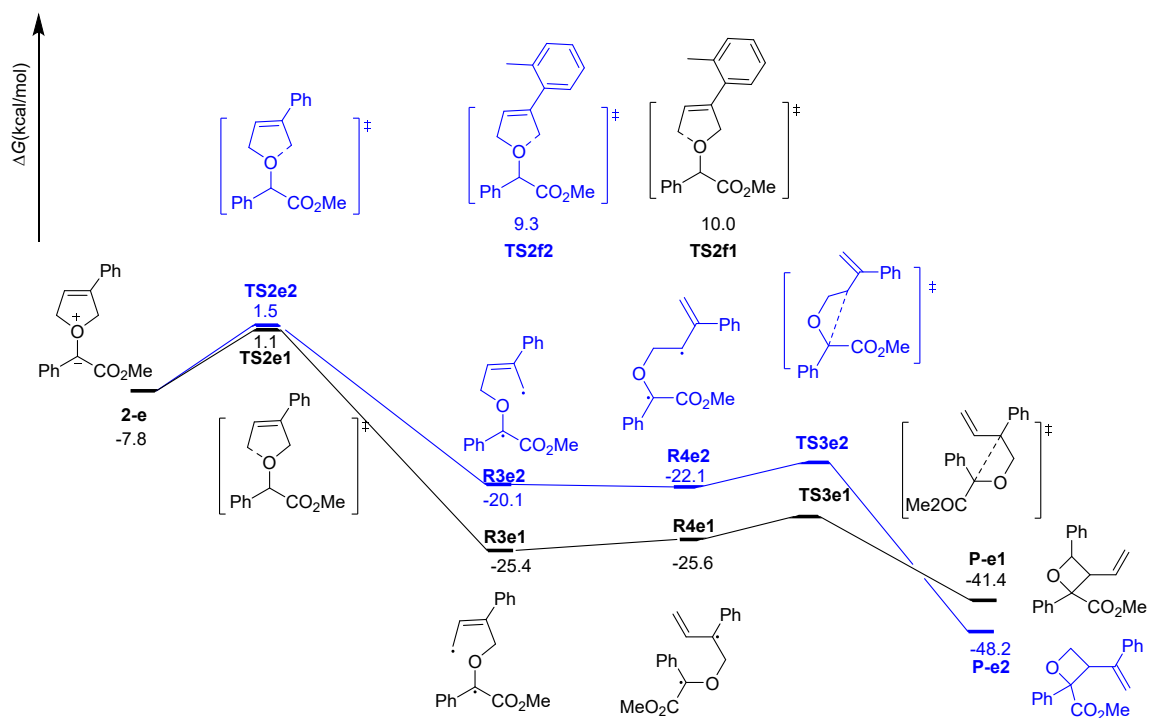

**Figure S8.** Free energy profiles for substrate **2e** and **2f**.

## Computed Energies of All Stationary Points

|                | $\Delta G$ | E(gas)      | G          | E(sol)       |
|----------------|------------|-------------|------------|--------------|
| <b>1</b>       | 0.10979    | -498.15135  | -498.04156 | -498.3007883 |
| <b>2</b>       | 0.201738   | -729.417888 | -729.21615 | -729.6489636 |
| <b>TS2</b>     | 0.19998    | -729.401843 | -729.20186 | -729.6265603 |
| <b>I3</b>      | 0.196164   | -729.439201 | -729.24304 | -729.6340021 |
| <b>R3</b>      | 0.195225   | -729.438334 | -729.24311 | -729.656889  |
| <b>R4</b>      | 0.19622    | -729.440047 | -729.24383 | -729.6587491 |
| <b>TS3</b>     | 0.198767   | -729.439396 | -729.24063 | -729.6586507 |
| <b>TS3b</b>    | 0.203409   | -729.43891  | -729.2355  | -729.657751  |
| <b>TS3c</b>    | 0.196804   | -729.391403 | -729.1946  | -729.609379  |
| <b>TS3-pri</b> | 0.198754   | -729.439322 | -729.24057 | -729.6587897 |
| <b>4</b>       | 0.200651   | -729.484653 | -729.284   | -729.7041749 |

**1**

|   |          |           |           |
|---|----------|-----------|-----------|
| C | 2.564496 | 1.321868  | -0.000241 |
| C | 1.210955 | 1.022262  | -0.000292 |
| C | 0.779004 | -0.337916 | -0.000097 |
| C | 1.768419 | -1.360281 | 0.000197  |
| C | 3.116683 | -1.039224 | 0.000251  |
| C | 3.523388 | 0.300950  | 0.000016  |
| H | 2.881217 | 2.361139  | -0.000407 |
| H | 0.458694 | 1.801557  | -0.000421 |
| H | 1.446385 | -2.396815 | 0.000363  |
| H | 3.859363 | -1.831831 | 0.000487  |

|   |           |           |           |
|---|-----------|-----------|-----------|
| H | 4.580962  | 0.547935  | 0.000041  |
| C | -0.579334 | -0.687578 | -0.000231 |
| C | -1.813732 | 0.049849  | 0.000056  |
| O | -1.884222 | 1.274696  | 0.000604  |
| O | -2.897249 | -0.758845 | -0.000550 |
| C | -4.160044 | -0.077611 | 0.000131  |
| H | -4.914608 | -0.864364 | 0.002405  |
| H | -4.258386 | 0.552338  | 0.888609  |
| H | -4.260867 | 0.549322  | -0.890246 |

2

|   |           |           |           |
|---|-----------|-----------|-----------|
| C | -3.688894 | 0.943909  | -0.000159 |
| C | -2.320046 | 1.181462  | 0.000135  |
| C | -1.401690 | 0.103644  | 0.000311  |
| C | -1.932837 | -1.206511 | 0.000193  |
| C | -3.308253 | -1.426634 | -0.000107 |
| C | -4.202557 | -0.357039 | -0.000286 |
| H | -4.368180 | 1.793193  | -0.000287 |
| H | -1.930657 | 2.191942  | 0.000206  |
| H | -1.261742 | -2.061362 | 0.000376  |
| H | -3.680232 | -2.448756 | -0.000193 |
| H | -5.274640 | -0.530740 | -0.000514 |
| C | 0.016916  | 0.344536  | 0.000668  |
| C | 0.757210  | 1.540615  | 0.000180  |

|   |          |           |           |
|---|----------|-----------|-----------|
| O | 0.329721 | 2.692451  | 0.000035  |
| O | 2.145371 | 1.289627  | -0.000068 |
| C | 2.943239 | 2.473091  | -0.000348 |
| H | 3.980585 | 2.130581  | -0.001260 |
| H | 2.744346 | 3.083150  | -0.886347 |
| H | 2.745775 | 3.082603  | 0.886362  |
| C | 1.513338 | -1.319776 | 1.224907  |
| C | 2.480637 | -2.309673 | -0.666487 |
| C | 1.512726 | -1.319567 | -1.224869 |
| H | 0.739971 | -1.727286 | 1.880061  |
| H | 1.977118 | -0.435190 | 1.666577  |
| H | 3.103947 | -2.924381 | -1.305202 |
| H | 0.738846 | -1.726795 | -1.879574 |
| H | 1.976236 | -0.434823 | -1.666511 |
| O | 0.812318 | -0.869193 | 0.000337  |
| C | 2.480992 | -2.309816 | 0.665832  |
| H | 3.104654 | -2.924666 | 1.304053  |

## TS2

|   |           |           |           |
|---|-----------|-----------|-----------|
| C | -3.684275 | 0.871986  | 0.081845  |
| C | -2.325108 | 1.146024  | -0.024103 |
| C | -1.385110 | 0.093206  | -0.106203 |
| C | -1.874120 | -1.233195 | -0.074078 |
| C | -3.235920 | -1.491849 | 0.038073  |



|   |           |           |           |
|---|-----------|-----------|-----------|
| C | -4.154487 | -0.443287 | 0.116583  |
| H | -4.386464 | 1.699851  | 0.140001  |
| H | -1.969180 | 2.167468  | -0.050767 |
| H | -1.172332 | -2.057651 | -0.139188 |
| H | -3.582261 | -2.522200 | 0.061980  |
| H | -5.218109 | -0.647326 | 0.200708  |
| C | 0.041723  | 0.333025  | -0.213071 |
| C | 0.693331  | 1.608109  | -0.081814 |
| O | 0.185298  | 2.719710  | -0.158668 |
| O | 2.056276  | 1.460619  | 0.145751  |
| C | 2.767459  | 2.697203  | 0.260803  |
| H | 3.810883  | 2.422160  | 0.424121  |
| H | 2.665655  | 3.292248  | -0.650927 |
| H | 2.390334  | 3.284819  | 1.102269  |
| C | 1.741268  | -1.539111 | 1.379562  |
| C | 2.406512  | -2.383868 | -0.730083 |
| C | 1.828295  | -1.090176 | -1.185731 |
| H | 0.996982  | -1.750873 | 2.143584  |
| H | 2.290183  | -0.611693 | 1.506682  |
| H | 2.738983  | -3.123522 | -1.449621 |
| H | 1.305905  | -1.152903 | -2.144802 |
| H | 2.526072  | -0.248631 | -1.193012 |
| O | 0.810934  | -0.785793 | -0.150426 |
| C | 2.299541  | -2.618814 | 0.593343  |
| H | 2.468632  | -3.603548 | 1.024952  |

### R3

|   |           |           |           |
|---|-----------|-----------|-----------|
| C | -3.940590 | 0.518593  | 0.136383  |
| C | -2.608828 | 0.903381  | 0.066091  |
| C | -1.580436 | -0.075112 | 0.045983  |
| C | -1.957522 | -1.442411 | 0.110644  |
| C | -3.292770 | -1.809334 | 0.182716  |
| C | -4.295260 | -0.833355 | 0.194502  |
| H | -4.713655 | 1.281911  | 0.147272  |
| H | -2.339906 | 1.949219  | 0.016662  |
| H | -1.178663 | -2.195074 | 0.111394  |
| H | -3.557839 | -2.861884 | 0.231290  |
| H | -5.340601 | -1.123319 | 0.249970  |
| C | -0.181465 | 0.246166  | -0.031348 |
| C | 0.351023  | 1.610080  | -0.096812 |
| O | -0.295261 | 2.629745  | -0.292531 |
| O | 1.702086  | 1.640844  | 0.097378  |
| C | 2.287978  | 2.947487  | 0.040504  |
| H | 3.356029  | 2.792515  | 0.195726  |
| H | 2.102180  | 3.412909  | -0.931176 |
| H | 1.874035  | 3.588830  | 0.823056  |
| C | 3.710557  | -1.021237 | 1.077422  |
| C | 2.475545  | -2.190131 | -0.714012 |
| C | 1.565297  | -1.055960 | -1.057831 |

|   |          |           |           |
|---|----------|-----------|-----------|
| H | 4.509975 | -1.046290 | 1.810822  |
| H | 3.110698 | -0.119908 | 1.015389  |
| H | 2.353496 | -3.117878 | -1.265096 |
| H | 0.939245 | -1.299913 | -1.923339 |
| H | 2.130126 | -0.144149 | -1.275568 |
| O | 0.685110 | -0.796774 | 0.073165  |
| C | 3.457466 | -2.115546 | 0.271625  |
| H | 4.073432 | -3.003216 | 0.414305  |

### I3

|   |           |           |           |
|---|-----------|-----------|-----------|
| C | -3.938117 | 0.492938  | 0.061028  |
| C | -2.610853 | 0.898547  | 0.032179  |
| C | -1.567432 | -0.062769 | 0.078118  |
| C | -1.924433 | -1.434105 | 0.164625  |
| C | -3.255389 | -1.822024 | 0.192468  |
| C | -4.272916 | -0.863012 | 0.139578  |
| H | -4.723324 | 1.242848  | 0.022221  |
| H | -2.355850 | 1.947086  | -0.032531 |
| H | -1.133613 | -2.172476 | 0.218465  |
| H | -3.505501 | -2.877277 | 0.258656  |
| H | -5.314859 | -1.169203 | 0.162211  |
| C | -0.171311 | 0.278002  | 0.043042  |
| C | 0.350017  | 1.645267  | -0.048923 |
| O | -0.306664 | 2.663805  | -0.213200 |

|   |          |           |           |
|---|----------|-----------|-----------|
| O | 1.708786 | 1.676874  | 0.079267  |
| C | 2.288217 | 2.984980  | -0.002828 |
| H | 3.362694 | 2.833178  | 0.103351  |
| H | 2.057101 | 3.451174  | -0.964441 |
| H | 1.908517 | 3.624503  | 0.798391  |
| C | 3.759349 | -1.085105 | 0.972067  |
| C | 2.383484 | -2.232398 | -0.721296 |
| C | 1.518583 | -1.059640 | -1.023570 |
| H | 4.587624 | -1.128438 | 1.671835  |
| H | 3.197944 | -0.158944 | 0.913206  |
| H | 2.168218 | -3.168026 | -1.228605 |
| H | 0.828455 | -1.273134 | -1.846481 |
| H | 2.109871 | -0.172839 | -1.270981 |
| O | 0.715319 | -0.741262 | 0.167483  |
| C | 3.419775 | -2.186482 | 0.210019  |
| H | 3.999363 | -3.098975 | 0.347260  |

#### **R4**

|   |           |           |           |
|---|-----------|-----------|-----------|
| C | -3.234943 | -1.365111 | 0.673319  |
| C | -1.855599 | -1.348970 | 0.511216  |
| C | -1.234368 | -0.330792 | -0.255204 |
| C | -2.066312 | 0.648546  | -0.856020 |
| C | -3.443006 | 0.616649  | -0.687858 |
| C | -4.039859 | -0.387845 | 0.080574  |

|   |           |           |           |
|---|-----------|-----------|-----------|
| H | -3.688464 | -2.151123 | 1.270915  |
| H | -1.240150 | -2.103654 | 0.980032  |
| H | -1.610173 | 1.419911  | -1.463703 |
| H | -4.057470 | 1.378708  | -1.159542 |
| H | -5.117722 | -0.409367 | 0.213421  |
| C | 0.191091  | -0.257267 | -0.460033 |
| C | 1.141248  | -1.237718 | 0.063682  |
| O | 0.921829  | -2.052255 | 0.949762  |
| O | 2.350095  | -1.170632 | -0.567892 |
| C | 3.332578  | -2.086786 | -0.071920 |
| H | 4.227538  | -1.905225 | -0.668186 |
| H | 3.531857  | -1.904548 | 0.988016  |
| H | 2.993755  | -3.119046 | -0.192345 |
| C | 0.118008  | 2.866005  | 1.085900  |
| C | 2.174206  | 1.659961  | 0.428271  |
| C | 1.837600  | 1.481053  | -1.018058 |
| H | -0.454440 | 3.353018  | 1.867707  |
| H | -0.331157 | 2.819772  | 0.100675  |
| H | 3.114016  | 1.238921  | 0.771261  |
| H | 2.648738  | 0.977743  | -1.543978 |
| H | 1.640719  | 2.443169  | -1.503385 |
| O | 0.600372  | 0.748641  | -1.269144 |
| C | 1.352970  | 2.307238  | 1.350164  |
| H | 1.722914  | 2.365908  | 2.373109  |

### TS3

|   |           |           |           |
|---|-----------|-----------|-----------|
| C | -2.603142 | -1.974987 | 0.568392  |
| C | -1.262933 | -1.659158 | 0.457030  |
| C | -0.852726 | -0.542613 | -0.323230 |
| C | -1.855657 | 0.230926  | -0.965209 |
| C | -3.205386 | -0.121567 | -0.859834 |
| C | -3.584865 | -1.212178 | -0.090970 |
| H | -2.900666 | -2.829025 | 1.170572  |
| H | -0.509426 | -2.244848 | 0.965255  |
| H | -1.546340 | 1.023131  | -1.631088 |
| H | -3.952499 | 0.466846  | -1.385069 |
| H | -4.633481 | -1.481390 | -0.000433 |
| C | 0.504136  | -0.109253 | -0.419920 |
| C | 1.663298  | -0.905185 | 0.025881  |
| O | 1.631515  | -1.858517 | 0.788788  |
| O | 2.824376  | -0.436960 | -0.503900 |
| C | 3.998712  | -1.138077 | -0.078424 |
| H | 4.829073  | -0.652579 | -0.592074 |
| H | 4.121833  | -1.066592 | 1.006174  |
| H | 3.939959  | -2.194006 | -0.355123 |
| C | -1.454347 | 2.521901  | 0.647187  |
| C | 0.868724  | 1.773504  | 0.971210  |
| C | 1.298344  | 2.021203  | -0.473194 |
| H | -2.451863 | 2.655384  | 1.050261  |

|   |           |          |           |
|---|-----------|----------|-----------|
| H | -1.286937 | 2.875534 | -0.362990 |
| H | 1.645183  | 1.560458 | 1.699589  |
| H | 2.389520  | 2.011298 | -0.551498 |
| H | 0.930959  | 2.973476 | -0.878774 |
| O | 0.740834  | 0.972129 | -1.275231 |
| C | -0.430721 | 2.062000 | 1.428263  |
| H | -0.649738 | 1.810006 | 2.464853  |

**TS3b**

|   |           |           |           |
|---|-----------|-----------|-----------|
| C | -2.474586 | -2.053240 | 0.489528  |
| C | -1.154626 | -1.738971 | 0.357486  |
| C | -0.753324 | -0.539934 | -0.335225 |
| C | -1.808036 | 0.356402  | -0.825124 |
| C | -3.183488 | -0.096003 | -0.746842 |
| C | -3.509295 | -1.235933 | -0.083959 |
| H | -2.756155 | -2.956679 | 1.023784  |
| H | -0.382989 | -2.372247 | 0.772532  |
| H | -1.536749 | 0.931954  | -1.703568 |
| H | -3.950958 | 0.518753  | -1.209903 |
| H | -4.545312 | -1.551455 | 0.001551  |
| C | 0.554862  | -0.120072 | -0.472482 |
| C | 1.740168  | -0.878920 | -0.034501 |
| O | 1.743823  | -1.915292 | 0.611267  |
| O | 2.889939  | -0.272973 | -0.434939 |

|   |           |           |           |
|---|-----------|-----------|-----------|
| C | 4.089281  | -0.945392 | -0.034786 |
| H | 4.907047  | -0.343871 | -0.433050 |
| H | 4.153053  | -1.009363 | 1.055291  |
| H | 4.120511  | -1.957563 | -0.446843 |
| C | -1.723209 | 2.055902  | 0.382978  |
| C | 0.638236  | 1.902879  | 1.100120  |
| C | 1.200253  | 2.111747  | -0.290770 |
| H | -2.743446 | 2.113420  | 0.750768  |
| H | -1.518121 | 2.749685  | -0.429033 |
| H | 1.348763  | 1.778349  | 1.912930  |
| H | 2.293809  | 2.130387  | -0.262514 |
| H | 0.850059  | 3.048186  | -0.744501 |
| O | 0.765721  | 1.061068  | -1.169836 |
| C | -0.688666 | 1.896690  | 1.372777  |
| H | -1.000805 | 1.647089  | 2.385420  |

**TS3c**

|   |          |           |           |
|---|----------|-----------|-----------|
| C | 0.838086 | -0.664574 | 1.681030  |
| C | 2.182308 | -1.064685 | 1.538896  |
| C | 2.447428 | -2.137304 | 0.583612  |
| C | 2.006885 | -1.888742 | -0.827589 |
| C | 0.288223 | -0.246546 | -0.216249 |
| H | 2.950087 | -3.067271 | 0.836851  |
| H | 2.972305 | -0.340058 | 1.755448  |



|   |           |           |           |
|---|-----------|-----------|-----------|
| H | 0.085263  | -1.447784 | 1.752642  |
| H | 0.604326  | 0.234317  | 2.247110  |
| H | 2.660651  | -1.170659 | -1.336942 |
| H | 1.976980  | -2.813495 | -1.409315 |
| C | -1.193483 | -0.120947 | -0.138430 |
| C | -1.846746 | 1.068007  | 0.233431  |
| C | -1.978278 | -1.263013 | -0.386120 |
| C | -3.234728 | 1.109922  | 0.340054  |
| H | -1.267787 | 1.957134  | 0.442949  |
| C | -3.365038 | -1.212703 | -0.276960 |
| H | -1.486510 | -2.183404 | -0.674391 |
| C | -4.003939 | -0.026343 | 0.085969  |
| H | -3.717094 | 2.041073  | 0.624907  |
| H | -3.948986 | -2.106503 | -0.479405 |
| H | -5.086198 | 0.012166  | 0.170702  |
| C | 1.131427  | 0.951598  | -0.554071 |
| O | 1.978168  | 0.971422  | -1.425163 |
| O | 0.924726  | 1.996673  | 0.282474  |
| C | 1.738611  | 3.151526  | 0.021567  |
| H | 1.442241  | 3.889223  | 0.767328  |
| H | 2.797359  | 2.901278  | 0.124401  |
| H | 1.559183  | 3.528685  | -0.988280 |
| O | 0.646312  | -1.389582 | -0.900416 |

TS3-pri

|   |           |           |           |
|---|-----------|-----------|-----------|
| C | -3.427417 | -1.133069 | 0.829289  |
| C | -2.070170 | -1.140341 | 0.536360  |
| C | -1.490806 | -0.072795 | -0.194763 |
| C | -2.333848 | 0.986569  | -0.614610 |
| C | -3.689462 | 0.977044  | -0.317658 |
| C | -4.246557 | -0.080939 | 0.407335  |
| H | -3.853392 | -1.958562 | 1.392773  |
| H | -1.438287 | -1.952030 | 0.869181  |
| H | -1.900547 | 1.801954  | -1.180580 |
| H | -4.317594 | 1.798225  | -0.651738 |
| H | -5.307329 | -0.085176 | 0.641293  |
| C | -0.088971 | -0.008278 | -0.523346 |
| C | 0.871211  | -1.082852 | -0.227820 |
| O | 0.717247  | -1.972882 | 0.594988  |
| O | 1.997000  | -0.977179 | -0.982593 |
| C | 2.987597  | -1.978583 | -0.713165 |
| H | 3.828534  | -1.736437 | -1.363926 |
| H | 3.289368  | -1.947828 | 0.336088  |
| H | 2.599120  | -2.973942 | -0.944542 |
| C | 3.536988  | 0.986004  | 1.253734  |
| C | 1.218016  | 1.671830  | 0.689716  |
| C | 1.352955  | 1.772678  | -0.804407 |
| H | 4.251540  | 0.720600  | 2.025464  |
| H | 3.890996  | 0.961702  | 0.228998  |

|   |          |          |           |
|---|----------|----------|-----------|
| H | 0.271672 | 2.015616 | 1.097359  |
| H | 2.310832 | 1.390193 | -1.161826 |
| H | 1.225870 | 2.798561 | -1.173049 |
| O | 0.280605 | 1.001942 | -1.381346 |
| C | 2.248257 | 1.338089 | 1.579357  |
| H | 1.983643 | 1.339936 | 2.635990  |

4

|   |           |           |           |
|---|-----------|-----------|-----------|
| C | -2.065398 | -1.975550 | 1.114838  |
| C | -0.955272 | -1.136250 | 1.047516  |
| C | -0.626719 | -0.500937 | -0.156657 |
| C | -1.410994 | -0.720326 | -1.289854 |
| C | -2.520280 | -1.563713 | -1.219545 |
| C | -2.852084 | -2.191054 | -0.018625 |
| H | -2.314940 | -2.463336 | 2.053031  |
| H | -0.337592 | -0.975169 | 1.926182  |
| H | -1.136006 | -0.231879 | -2.217604 |
| H | -3.125039 | -1.731303 | -2.106583 |
| H | -3.716902 | -2.846419 | 0.034606  |
| C | 0.554503  | 0.448183  | -0.224822 |
| C | 1.783948  | -0.230038 | 0.366902  |
| O | 2.100377  | -0.136118 | 1.536071  |
| O | 2.433388  | -0.968715 | -0.540038 |
| C | 3.573933  | -1.688180 | -0.041620 |

|   |           |           |           |
|---|-----------|-----------|-----------|
| H | 3.979530  | -2.220732 | -0.901385 |
| H | 4.312871  | -0.995319 | 0.368651  |
| H | 3.269000  | -2.388925 | 0.739915  |
| C | -1.918997 | 2.986242  | 0.735144  |
| C | 0.316777  | 1.899703  | 0.321855  |
| C | 0.423261  | 2.303006  | -1.158017 |
| H | -2.783606 | 3.142439  | 1.373330  |
| H | -1.911864 | 3.528346  | -0.206702 |
| H | 1.190440  | 2.211284  | 0.903491  |
| H | 1.203033  | 3.028263  | -1.412212 |
| H | -0.521689 | 2.600854  | -1.625259 |
| O | 0.794174  | 0.959217  | -1.553838 |
| C | -0.926772 | 2.176400  | 1.101735  |
| H | -0.986179 | 1.661901  | 2.059884  |

**2e**

|   |          |           |           |
|---|----------|-----------|-----------|
| C | 3.178027 | 0.700207  | 0.000285  |
| C | 0.923362 | 0.095358  | -0.000000 |
| C | 1.767460 | -1.161608 | -0.000281 |
| H | 3.731549 | 1.052178  | -0.885784 |
| H | 3.731206 | 1.051486  | 0.886868  |
| H | 1.576856 | -1.786343 | -0.887406 |
| H | 1.576990 | -1.786557 | 0.886710  |
| O | 3.123711 | -0.726448 | -0.000342 |

|   |           |           |           |
|---|-----------|-----------|-----------|
| C | 1.748751  | 1.150786  | 0.000292  |
| H | 1.466681  | 2.197539  | 0.000641  |
| C | -0.542371 | 0.061616  | -0.000003 |
| C | -1.222064 | -1.168024 | 0.000200  |
| C | -1.308829 | 1.241293  | -0.000255 |
| C | -2.615447 | -1.218247 | 0.000237  |
| H | -0.658926 | -2.096156 | 0.000311  |
| C | -2.697871 | 1.191425  | -0.000216 |
| H | -0.808952 | 2.205077  | -0.000516 |
| C | -3.359845 | -0.039955 | 0.000045  |
| H | -3.118025 | -2.181373 | 0.000415  |
| H | -3.268745 | 2.115812  | -0.000407 |
| H | -4.445351 | -0.077179 | 0.000072  |

**2-e**

|   |          |           |           |
|---|----------|-----------|-----------|
| C | 4.953583 | -1.362056 | -0.631856 |
| C | 4.039252 | -0.322649 | -0.514122 |
| C | 2.722248 | -0.569793 | -0.056371 |
| C | 2.384327 | -1.902953 | 0.271255  |
| C | 3.313599 | -2.933066 | 0.147162  |
| C | 4.607485 | -2.677220 | -0.304960 |
| H | 5.957321 | -1.139484 | -0.986461 |
| H | 4.315129 | 0.692886  | -0.769646 |
| H | 1.383865 | -2.134795 | 0.626697  |

|   |           |           |           |
|---|-----------|-----------|-----------|
| H | 3.017461  | -3.946557 | 0.408429  |
| H | 5.330546  | -3.481939 | -0.400853 |
| C | 1.771458  | 0.503061  | 0.066263  |
| C | 1.879286  | 1.877780  | -0.211338 |
| O | 2.861624  | 2.488924  | -0.625385 |
| O | 0.668664  | 2.554066  | 0.045873  |
| C | 0.724695  | 3.955422  | -0.218141 |
| H | -0.269354 | 4.341037  | 0.019517  |
| H | 1.480142  | 4.444449  | 0.403942  |
| H | 0.966573  | 4.150263  | -1.267088 |
| C | -0.676033 | -0.028444 | -0.378403 |
| C | -1.435881 | 0.110090  | 1.825402  |
| C | 0.027200  | 0.367287  | 1.924176  |
| H | -0.499079 | -0.922067 | -0.980470 |
| H | -0.665742 | 0.871833  | -0.995645 |
| H | -2.070773 | 0.138546  | 2.702533  |
| H | 0.589903  | -0.311021 | 2.570606  |
| H | 0.293909  | 1.407686  | 2.125066  |
| O | 0.470075  | 0.072738  | 0.543341  |
| C | -1.842689 | -0.111826 | 0.565840  |
| C | -3.196720 | -0.380704 | 0.071421  |
| C | -3.453696 | -0.393304 | -1.309220 |
| C | -4.262226 | -0.631794 | 0.953294  |
| C | -4.736962 | -0.639833 | -1.793914 |
| C | -5.541447 | -0.877750 | 0.468887  |

|   |           |           |           |
|---|-----------|-----------|-----------|
| C | -5.785174 | -0.882048 | -0.907594 |
| H | -2.650775 | -0.200495 | -2.014863 |
| H | -4.084270 | -0.646116 | 2.024139  |
| H | -4.915073 | -0.642231 | -2.865070 |
| H | -6.351504 | -1.072254 | 1.165619  |
| H | -6.785008 | -1.076763 | -1.283767 |

### **TS2e1**

|   |           |           |           |
|---|-----------|-----------|-----------|
| C | -4.438756 | -2.183446 | -0.394564 |
| C | -3.781435 | -0.959940 | -0.460828 |
| C | -2.431056 | -0.848863 | -0.056534 |
| C | -1.782795 | -2.013896 | 0.415932  |
| C | -2.454680 | -3.229101 | 0.481084  |
| C | -3.787876 | -3.326551 | 0.076436  |
| H | -5.475902 | -2.243724 | -0.714482 |
| H | -4.291402 | -0.079532 | -0.828763 |
| H | -0.746772 | -1.951318 | 0.730375  |
| H | -1.931766 | -4.108122 | 0.849559  |
| H | -4.310163 | -4.277760 | 0.125703  |
| C | -1.703790 | 0.404533  | -0.107223 |
| C | -2.262865 | 1.690627  | -0.438965 |
| O | -3.336356 | 1.921181  | -0.980610 |
| O | -1.411187 | 2.722235  | -0.072971 |
| C | -1.897907 | 4.028548  | -0.398039 |

|   |           |           |           |
|---|-----------|-----------|-----------|
| H | -1.125505 | 4.721935  | -0.061412 |
| H | -2.059791 | 4.127442  | -1.474919 |
| H | -2.842393 | 4.228510  | 0.115178  |
| C | 0.217568  | 0.954387  | 2.160625  |
| C | 1.878606  | 0.449438  | 0.536791  |
| C | 0.728421  | 0.808846  | -0.345129 |
| H | -0.348507 | 0.509396  | 2.976112  |
| H | -0.096778 | 1.953154  | 1.876417  |
| H | 0.697632  | 0.278396  | -1.298273 |
| H | 0.601059  | 1.880979  | -0.515022 |
| O | -0.461470 | 0.365561  | 0.430829  |
| C | 1.526919  | 0.475843  | 1.861766  |
| H | 2.106091  | -0.060603 | 2.609294  |
| C | 3.151816  | -0.044295 | 0.017377  |
| C | 3.292687  | -0.535437 | -1.295082 |
| C | 4.295179  | -0.035968 | 0.842825  |
| C | 4.515181  | -1.021505 | -1.750179 |
| H | 2.440102  | -0.557396 | -1.965424 |
| C | 5.514512  | -0.521878 | 0.385964  |
| H | 4.223619  | 0.381013  | 1.842541  |
| C | 5.632209  | -1.020696 | -0.913795 |
| H | 4.594330  | -1.402769 | -2.764229 |
| H | 6.380271  | -0.500905 | 1.041826  |
| H | 6.586352  | -1.394405 | -1.273234 |



## TS2e2

|   |           |           |           |
|---|-----------|-----------|-----------|
| C | -4.081325 | 2.550135  | -0.462766 |
| C | -3.632550 | 1.241793  | -0.316071 |
| C | -2.305390 | 0.974211  | 0.090516  |
| C | -1.460124 | 2.083338  | 0.333166  |
| C | -1.919143 | 3.385801  | 0.176309  |
| C | -3.234399 | 3.633853  | -0.221777 |
| H | -5.108575 | 2.723502  | -0.773420 |
| H | -4.304868 | 0.417810  | -0.509711 |
| H | -0.437426 | 1.906702  | 0.645875  |
| H | -1.242815 | 4.214804  | 0.369037  |
| H | -3.592707 | 4.652292  | -0.340914 |
| C | -1.773133 | -0.367754 | 0.255449  |
| C | -2.343545 | -1.646265 | -0.078322 |
| O | -1.670460 | -2.675802 | -0.209829 |
| O | -3.698728 | -1.659641 | -0.212484 |
| C | -4.257789 | -2.931769 | -0.555208 |
| H | -5.332312 | -2.763598 | -0.638407 |
| H | -3.851789 | -3.293713 | -1.503948 |
| H | -4.045414 | -3.671456 | 0.221644  |
| C | 1.015438  | -0.870655 | -0.772755 |
| C | 1.552232  | -1.087702 | 1.510077  |
| C | 0.086970  | -1.281204 | 1.607165  |
| H | 1.009259  | -0.133273 | -1.571223 |

|   |           |           |           |
|---|-----------|-----------|-----------|
| H | 0.487052  | -1.797533 | -0.969819 |
| H | 2.161364  | -1.039369 | 2.405370  |
| H | -0.348433 | -0.920212 | 2.544002  |
| H | -0.272724 | -2.290842 | 1.385972  |
| O | -0.442851 | -0.415650 | 0.506865  |
| C | 2.020603  | -0.790212 | 0.267858  |
| C | 3.369867  | -0.257633 | -0.016088 |
| C | 3.941926  | -0.434156 | -1.285816 |
| C | 4.109448  | 0.429251  | 0.960720  |
| C | 5.215605  | 0.054361  | -1.570304 |
| H | 3.387418  | -0.976777 | -2.046634 |
| C | 5.385342  | 0.909219  | 0.679881  |
| H | 3.667173  | 0.611288  | 1.935343  |
| C | 5.943697  | 0.724707  | -0.587212 |
| H | 5.641709  | -0.095154 | -2.558291 |
| H | 5.940167  | 1.442675  | 1.446586  |
| H | 6.936873  | 1.105681  | -0.806822 |

### **R3e1**

|   |           |           |           |
|---|-----------|-----------|-----------|
| C | -3.702310 | -2.879738 | 0.034152  |
| C | -3.370273 | -1.540862 | -0.122146 |
| C | -2.064378 | -1.084749 | 0.195532  |
| C | -1.127930 | -2.031161 | 0.689713  |
| C | -1.477457 | -3.364662 | 0.842036  |

|   |           |           |           |
|---|-----------|-----------|-----------|
| C | -2.765242 | -3.801217 | 0.513184  |
| H | -4.705384 | -3.210538 | -0.220467 |
| H | -4.096546 | -0.833919 | -0.498090 |
| H | -0.135984 | -1.691051 | 0.959152  |
| H | -0.743919 | -4.069981 | 1.222726  |
| H | -3.036083 | -4.846419 | 0.631771  |
| C | -1.645266 | 0.283182  | 0.046048  |
| C | -2.519345 | 1.373206  | -0.395854 |
| O | -3.626028 | 1.250471  | -0.901848 |
| O | -1.963465 | 2.599629  | -0.169777 |
| C | -2.772839 | 3.708359  | -0.582825 |
| H | -2.187819 | 4.597948  | -0.347757 |
| H | -2.983008 | 3.656427  | -1.654498 |
| H | -3.720592 | 3.716197  | -0.038198 |
| C | 1.283318  | 3.296984  | 1.365869  |
| C | 1.890482  | 1.243234  | 0.114176  |
| C | 0.530276  | 1.164342  | -0.512122 |
| H | 1.584880  | 4.071489  | 2.063354  |
| H | 0.254420  | 3.315433  | 1.022608  |
| H | 0.534026  | 0.542282  | -1.411598 |
| H | 0.166707  | 2.156397  | -0.780734 |
| O | -0.380612 | 0.567103  | 0.453258  |
| C | 2.165603  | 2.319029  | 0.992398  |
| H | 3.153569  | 2.347398  | 1.445966  |
| C | 2.855345  | 0.187230  | -0.144770 |

|   |          |           |           |
|---|----------|-----------|-----------|
| C | 2.436865 | -1.079920 | -0.617924 |
| C | 4.242895 | 0.371419  | 0.065958  |
| C | 3.349761 | -2.102384 | -0.849909 |
| H | 1.381576 | -1.276536 | -0.769639 |
| C | 5.151781 | -0.650789 | -0.174662 |
| H | 4.613238 | 1.337854  | 0.390732  |
| C | 4.713860 | -1.897389 | -0.631740 |
| H | 2.992748 | -3.067180 | -1.199433 |
| H | 6.211452 | -0.472982 | -0.013268 |
| H | 5.426686 | -2.695133 | -0.818357 |

### **R3e2**

|   |           |           |           |
|---|-----------|-----------|-----------|
| C | -5.274081 | 1.563533  | -0.303552 |
| C | -4.403737 | 0.486720  | -0.205948 |
| C | -3.007961 | 0.704220  | -0.064703 |
| C | -2.539625 | 2.044345  | -0.038234 |
| C | -3.422788 | 3.108511  | -0.139197 |
| C | -4.796542 | 2.877999  | -0.270918 |
| H | -6.339337 | 1.377118  | -0.407722 |
| H | -4.777986 | -0.527190 | -0.227083 |
| H | -1.474697 | 2.219203  | 0.053818  |
| H | -3.041740 | 4.125741  | -0.116595 |
| H | -5.486505 | 3.713317  | -0.348799 |
| C | -2.047067 | -0.358905 | 0.047366  |

|   |           |           |           |
|---|-----------|-----------|-----------|
| C | -2.385316 | -1.784679 | 0.028780  |
| O | -3.507821 | -2.262359 | 0.114204  |
| O | -1.277355 | -2.571237 | -0.106702 |
| C | -1.539466 | -3.980131 | -0.129697 |
| H | -0.562587 | -4.454533 | -0.227061 |
| H | -2.032768 | -4.296900 | 0.793107  |
| H | -2.179186 | -4.238193 | -0.977705 |
| C | 1.930817  | -1.430609 | -0.779921 |
| C | 1.450551  | 0.126741  | 1.043197  |
| C | 0.042597  | -0.325749 | 1.244940  |
| H | 2.615006  | -1.800148 | -1.535834 |
| H | 0.932984  | -1.851312 | -0.752365 |
| H | 1.827372  | 0.899124  | 1.705871  |
| H | -0.410182 | 0.181179  | 2.104185  |
| H | -0.014225 | -1.407270 | 1.405054  |
| O | -0.737996 | 0.009941  | 0.062823  |
| C | 2.312737  | -0.407538 | 0.077975  |
| C | 3.692122  | 0.152812  | -0.023670 |
| C | 4.798385  | -0.692125 | -0.194359 |
| C | 3.912932  | 1.535883  | 0.048451  |
| C | 6.087335  | -0.170538 | -0.288597 |
| H | 4.644715  | -1.766704 | -0.232071 |
| C | 5.201502  | 2.059179  | -0.046460 |
| H | 3.063528  | 2.204407  | 0.154354  |
| C | 6.294158  | 1.207771  | -0.214662 |

|   |          |           |           |
|---|----------|-----------|-----------|
| H | 6.932237 | -0.842371 | -0.412640 |
| H | 5.350823 | 3.134291  | 0.002682  |
| H | 7.298599 | 1.614846  | -0.288548 |

**R4e1**

|   |           |           |           |
|---|-----------|-----------|-----------|
| C | -4.299051 | -1.287662 | 1.132759  |
| C | -2.979617 | -1.315762 | 0.700519  |
| C | -2.493077 | -0.322755 | -0.187362 |
| C | -3.399248 | 0.676511  | -0.626527 |
| C | -4.715635 | 0.688141  | -0.189174 |
| C | -5.177021 | -0.290500 | 0.697188  |
| H | -4.647577 | -2.053900 | 1.819855  |
| H | -2.304389 | -2.084271 | 1.050136  |
| H | -3.051833 | 1.426113  | -1.326297 |
| H | -5.389856 | 1.463737  | -0.542344 |
| H | -6.207316 | -0.277279 | 1.040975  |
| C | -1.137002 | -0.302577 | -0.670115 |
| C | -0.150227 | -1.344516 | -0.373009 |
| O | -0.178416 | -2.104709 | 0.584933  |
| O | 0.831183  | -1.395963 | -1.312933 |
| C | 1.867869  | -2.350719 | -1.043569 |
| H | 2.585920  | -2.234272 | -1.854820 |
| H | 2.341719  | -2.139917 | -0.082839 |
| H | 1.457063  | -3.363703 | -1.031260 |

|   |           |           |           |
|---|-----------|-----------|-----------|
| C | -0.892220 | 2.839134  | 0.725654  |
| C | 1.026782  | 1.494601  | -0.101018 |
| C | 0.459946  | 1.365828  | -1.489877 |
| H | -1.338122 | 3.398783  | 1.540710  |
| H | -1.451819 | 2.789089  | -0.200133 |
| H | 1.133681  | 0.817603  | -2.145734 |
| H | 0.242663  | 2.344304  | -1.928896 |
| O | -0.840920 | 0.705839  | -1.527721 |
| C | 0.316891  | 2.215851  | 0.885297  |
| H | 0.799033  | 2.305035  | 1.856559  |
| C | 2.295532  | 0.847622  | 0.225438  |
| C | 2.526604  | 0.313575  | 1.511599  |
| C | 3.328414  | 0.724587  | -0.728503 |
| C | 3.730970  | -0.308003 | 1.826399  |
| C | 4.534887  | 0.111453  | -0.408378 |
| C | 4.744662  | -0.410185 | 0.870624  |
| H | 1.731056  | 0.341629  | 2.248605  |
| H | 3.193189  | 1.137715  | -1.723138 |
| H | 3.873384  | -0.727347 | 2.818340  |
| H | 5.317324  | 0.043024  | -1.159102 |
| H | 5.684346  | -0.895430 | 1.117482  |

## R4e2

|   |           |           |           |
|---|-----------|-----------|-----------|
| C | -3.550612 | -1.789936 | -1.553112 |
|---|-----------|-----------|-----------|

|   |           |           |           |
|---|-----------|-----------|-----------|
| C | -2.734496 | -0.682156 | -1.363473 |
| C | -2.415165 | -0.241274 | -0.054209 |
| C | -2.968712 | -0.954754 | 1.039875  |
| C | -3.785808 | -2.056707 | 0.833913  |
| C | -4.081420 | -2.486847 | -0.463620 |
| H | -3.775593 | -2.114461 | -2.565395 |
| H | -2.321329 | -0.153984 | -2.211088 |
| H | -2.754073 | -0.616722 | 2.045905  |
| H | -4.197564 | -2.584990 | 1.689559  |
| H | -4.718862 | -3.351861 | -0.622744 |
| C | -1.568199 | 0.894898  | 0.209789  |
| C | -0.990454 | 1.742252  | -0.833223 |
| O | -0.905553 | 1.466252  | -2.021825 |
| O | -0.546993 | 2.934268  | -0.337245 |
| C | 0.076063  | 3.786033  | -1.305631 |
| H | 0.375121  | 4.680188  | -0.757483 |
| H | 0.947626  | 3.294925  | -1.747937 |
| H | -0.625693 | 4.041438  | -2.103791 |
| C | 0.549620  | -1.281081 | 1.789662  |
| C | 1.071813  | 1.063459  | 1.320482  |
| C | -0.106176 | 1.632213  | 2.040886  |
| H | 0.814616  | -2.329930 | 1.721925  |
| H | -0.361435 | -1.030962 | 2.317923  |
| H | 1.709543  | 1.761438  | 0.789087  |
| H | -0.078982 | 2.721629  | 2.019356  |



|   |           |           |           |
|---|-----------|-----------|-----------|
| H | -0.146689 | 1.295218  | 3.082065  |
| O | -1.402402 | 1.197622  | 1.519649  |
| C | 1.350943  | -0.305165 | 1.215341  |
| C | 2.550997  | -0.720536 | 0.433023  |
| C | 2.470745  | -1.780888 | -0.480636 |
| C | 3.776553  | -0.057218 | 0.586851  |
| C | 3.587241  | -2.169550 | -1.218864 |
| C | 4.894195  | -0.446449 | -0.149531 |
| C | 4.803201  | -1.504351 | -1.055274 |
| H | 1.518709  | -2.282045 | -0.628628 |
| H | 3.855871  | 0.754426  | 1.304626  |
| H | 3.504475  | -2.986935 | -1.929732 |
| H | 5.838490  | 0.072833  | -0.010962 |
| H | 5.673381  | -1.806999 | -1.630826 |

**Pe1**

|   |          |           |           |
|---|----------|-----------|-----------|
| C | 3.403792 | -0.521409 | -1.931307 |
| C | 2.148787 | -0.641406 | -1.336706 |
| C | 1.978338 | -0.337893 | 0.021555  |
| C | 3.083541 | 0.088758  | 0.765468  |
| C | 4.339349 | 0.197899  | 0.169735  |
| C | 4.504173 | -0.103368 | -1.181755 |
| H | 3.520970 | -0.761480 | -2.984485 |
| H | 1.309463 | -0.996339 | -1.920109 |

|   |           |           |           |
|---|-----------|-----------|-----------|
| H | 2.944654  | 0.331420  | 1.811748  |
| H | 5.188595  | 0.524070  | 0.763896  |
| H | 5.481301  | -0.013212 | -1.648241 |
| C | 0.624028  | -0.367858 | 0.688743  |
| C | -0.199852 | -1.626704 | 0.383540  |
| O | -0.108733 | -2.307329 | -0.615434 |
| O | -1.126073 | -1.829392 | 1.335523  |
| C | -2.097769 | -2.842189 | 1.028426  |
| H | -2.763786 | -2.875704 | 1.890335  |
| H | -2.647194 | -2.566963 | 0.124212  |
| H | -1.610495 | -3.807918 | 0.876635  |
| C | 0.787951  | 3.245706  | 0.483565  |
| C | -0.299015 | 0.948797  | 0.535684  |
| C | -0.292371 | 0.899532  | 2.077657  |
| H | 1.301207  | 4.019603  | -0.079141 |
| H | 0.572039  | 3.472325  | 1.523351  |
| H | -1.228884 | 0.545246  | 2.516237  |
| H | 0.047907  | 1.794610  | 2.604317  |
| O | 0.706388  | -0.137690 | 2.105174  |
| C | 0.450085  | 2.095168  | -0.094700 |
| H | 0.695488  | 1.939684  | -1.143369 |
| C | -1.628446 | 0.784430  | -0.177141 |
| C | -2.834518 | 1.131607  | 0.440470  |
| C | -1.663117 | 0.314292  | -1.497066 |
| C | -4.047635 | 0.992723  | -0.233633 |

|   |           |           |           |
|---|-----------|-----------|-----------|
| C | -2.874488 | 0.167779  | -2.170481 |
| C | -4.073153 | 0.503906  | -1.539854 |
| H | -2.832157 | 1.517778  | 1.454987  |
| H | -0.738604 | 0.047988  | -1.998413 |
| H | -4.973374 | 1.266542  | 0.264802  |
| H | -2.879870 | -0.210498 | -3.188718 |
| H | -5.017987 | 0.389496  | -2.063344 |

## Pe2

|   |           |           |           |
|---|-----------|-----------|-----------|
| C | -0.991085 | 2.421873  | 1.000977  |
| C | -0.081653 | 1.604787  | 0.335119  |
| C | 0.494458  | 0.509669  | 0.987213  |
| C | 0.165926  | 0.253731  | 2.320180  |
| C | -0.742146 | 1.074532  | 2.988266  |
| C | -1.327124 | 2.156536  | 2.329384  |
| H | -1.444434 | 3.258574  | 0.477881  |
| H | 0.149611  | 1.798705  | -0.707445 |
| H | 0.632000  | -0.583940 | 2.826539  |
| H | -0.992091 | 0.868098  | 4.025340  |
| H | -2.039209 | 2.791562  | 2.849066  |
| C | 1.386432  | -0.457659 | 0.244626  |
| C | 2.182764  | 0.246220  | -0.856004 |
| O | 2.005558  | 0.096707  | -2.048541 |
| O | 3.107486  | 1.058979  | -0.330296 |

|   |           |           |           |
|---|-----------|-----------|-----------|
| C | 3.919737  | 1.767052  | -1.280658 |
| H | 4.610878  | 2.362771  | -0.685099 |
| H | 4.463288  | 1.064006  | -1.916891 |
| H | 3.297485  | 2.409544  | -1.909246 |
| C | -1.220828 | -3.026533 | 0.694638  |
| C | 0.744069  | -1.807037 | -0.238907 |
| C | 1.751565  | -2.460907 | 0.721758  |
| H | -2.289908 | -3.189101 | 0.786842  |
| H | -0.579667 | -3.745993 | 1.192611  |
| H | 0.995277  | -1.979010 | -1.288688 |
| H | 2.510987  | -3.095005 | 0.250552  |
| H | 1.325280  | -2.983289 | 1.583650  |
| O | 2.294523  | -1.178775 | 1.117053  |
| C | -0.734161 | -2.007064 | -0.025363 |
| C | -1.636639 | -1.021806 | -0.675212 |
| C | -1.334396 | -0.472889 | -1.931177 |
| C | -2.794265 | -0.582851 | -0.014477 |
| C | -2.173820 | 0.476988  | -2.511104 |
| C | -3.629314 | 0.368644  | -0.592290 |
| C | -3.323412 | 0.902802  | -1.845399 |
| H | -0.427461 | -0.762921 | -2.449667 |
| H | -3.005946 | -0.955052 | 0.982593  |
| H | -1.922337 | 0.889626  | -3.484289 |
| H | -4.510401 | 0.708246  | -0.054839 |
| H | -3.970548 | 1.651355  | -2.294054 |

## Characterization Data of Products

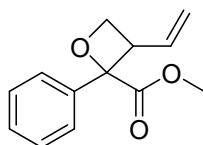

**Compound 3a major:**  $^1\text{H NMR}$  (400 MHz,  $\text{CDCl}_3$ )  $\delta$  7.42 – 7.30 (m, 7H), 5.94 (dd,  $J = 12.5, 6.4$  Hz, 1H), 5.89 (d,  $J = 6.3$  Hz, 1H), 5.53 (d,  $J = 6.2$  Hz, 1H), 5.44 (tt,  $J = 7.6, 4.6$  Hz, 1H), 4.66 – 4.58 (m, 3H), 3.73 (s, 4H), 3.71 (s, 1H).  $^{13}\text{C NMR}$  (101 MHz,  $\text{CDCl}_3$ )  $\delta$  172.57, 135.92, 128.84, 128.52, 128.20, 127.85, 127.56, 87.77, 75.71, 58.30, 52.20. **Compound 3a minor:**  $^1\text{H NMR}$  (400 MHz,  $\text{CDCl}_3$ )  $\delta$  7.42 – 7.30 (m, 5H), 5.94 (dd,  $J = 12.5, 6.4$  Hz, 1H), 5.53 (d,  $J = 6.2$  Hz, 1H), 5.44 (tt,  $J = 7.6, 4.6$  Hz, 1H), 4.74 – 4.67 (m, 2H), 3.75 (s, 3H), 3.71 (d,  $J = 8.7$  Hz, 1H).  $^{13}\text{C NMR}$  (101 MHz,  $\text{CDCl}_3$ )  $\delta$  172.26, 135.07, 128.76, 128.52, 128.31, 127.80, 87.33, 75.66, 57.20, 52.09. **HRMS (ESI)**  $m/z$ :  $[\text{M} + \text{H}]^+$  Calcd for  $\text{C}_{13}\text{H}_{14}\text{O}_3$ : 219.1015; Found: 219.1007.

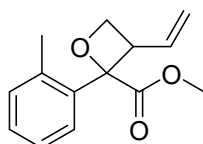

**Compound 3b major:**  $^1\text{H NMR}$  (400 MHz,  $\text{CDCl}_3$ )  $\delta$  7.50 – 7.42 (m, 1H), 7.21 (d,  $J = 2.7$  Hz, 3H), 6.02 – 5.96 (m, 1H), 5.93 (dt,  $J = 6.4, 1.8$  Hz, 1H), 5.56 – 5.46 (m, 1H), 4.80 – 4.65 (m, 3H), 4.02 (s, 1H), 3.73 (s, 3H), 2.40 (s, 3H).  $^{13}\text{C NMR}$  (101 MHz,  $\text{CDCl}_3$ )  $\delta$  172.91, 136.47, 133.76, 130.73, 128.23, 127.50, 127.38, 127.29, 126.42, 88.05, 75.74, 53.02, 52.15, 20.27. **Compound 3b minor:**  $^1\text{H NMR}$  (400 MHz,  $\text{CDCl}_3$ )  $\delta$  7.50 – 7.42 (m, 1H), 7.21 (d,  $J = 2.7$  Hz, 3H), 6.02 – 5.96 (m, 1H), 5.56 – 5.46 (m, 1H), 5.43 (dd,  $J = 8.2, 4.7$  Hz, 1H), 4.62 – 4.59 (m, 2H),

3.99 (d,  $J = 1.7$  Hz, 1H), 3.70 (s, 3H), 2.41 (s, 3H).  $^{13}\text{C}$  NMR (101 MHz,  $\text{CDCl}_3$ )  $\delta$  172.91, 136.47, 133.76, 130.73, 128.23, 127.50, 127.38, 127.29, 126.42, 88.05, 75.74, 53.02, 52.15, 20.27. HRMS (ESI)  $m/z$ :  $[\text{M} + \text{H}]^+$  Calcd for  $\text{C}_{14}\text{H}_{16}\text{O}_3$ : 233.1172; Found: 233.1173.

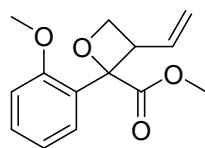

**Compound 3c major:**  $^1\text{H}$  NMR (400 MHz,  $\text{CDCl}_3$ )  $\delta$  7.43 (d,  $J = 1.7$  Hz, 1H), 7.32 – 7.22 (m, 1H), 6.96 (t,  $J = 7.5$  Hz, 1H), 6.93 – 6.88 (m, 1H), 5.87 (dd,  $J = 6.2, 1.8$  Hz, 1H), 5.55 – 5.50 (m, 1H), 5.46 (m, 1H), 4.66 (dt,  $J = 4.1, 1.9$  Hz, 2H), 4.24 (d,  $J = 8.6$  Hz, 1H), 3.83 (s, 4H), 3.72 (s, 3H).  $^{13}\text{C}$  NMR (101 MHz,  $\text{CDCl}_3$ )  $\delta$  172.94, 156.96, 129.28, 128.75, 127.70, 127.49, 124.01, 120.82, 111.06, 87.39, 75.70, 55.70, 52.01, 49.95. **Compound 3c minor:**  $^1\text{H}$  NMR (400 MHz,  $\text{CDCl}_3$ )  $\delta$  7.41 (d,  $J = 1.6$  Hz, 1H), 7.32 – 7.22 (m, 1H), 6.96 (t,  $J = 7.5$  Hz, 1H), 6.93 – 6.88 (m, 1H), 5.94 – 5.89 (m, 1H), 5.87 (dd,  $J = 6.2, 1.8$  Hz, 1H), 5.46 (m, 1H), 4.60 – 4.45 (m, 2H), 4.32 (d,  $J = 6.2$  Hz, 1H), 3.84 (s, 3H), 3.71 (s, 3H).  $^{13}\text{C}$  NMR (101 MHz,  $\text{CDCl}_3$ )  $\delta$  172.70, 157.14, 129.95, 128.51, 128.05, 127.60, 124.33, 120.62, 110.66, 86.40, 75.62, 55.61, 51.95, 49.00. HRMS (ESI)  $m/z$ :  $[\text{M} + \text{H}]^+$  Calcd for  $\text{C}_{14}\text{H}_{16}\text{O}_4$ : 249.1121; Found: 249.1123.

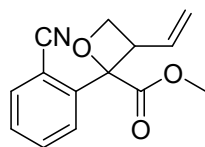

**Compound 3d major:**  $^1\text{H}$  NMR (400 MHz,  $\text{CDCl}_3$ )  $\delta$  7.73 – 7.66 (m, 2H), 7.61 (td,  $J = 7.8, 7.0, 4.8$  Hz, 1H), 7.47 – 7.37 (m, 1H), 6.01 (d,  $J = 6.3$  Hz, 1H), 5.95 (s, 1H), 5.47 (m, 1H), 4.69 – 4.63 (m, 2H), 4.20 (d,  $J = 6.8$  Hz, 1H), 3.77 (d,  $J = 1.8$  Hz, 3H).  $^{13}\text{C}$  NMR (101 MHz,  $\text{CDCl}_3$ )  $\delta$  171.04, 139.52, 132.97, 132.79, 129.06, 128.96, 127.89, 127.11, 117.99, 114.35, 87.16, 75.90, 54.67, 52.51. **Compound 3d minor:**  $^1\text{H}$  NMR (400 MHz,  $\text{CDCl}_3$ )  $\delta$  7.73 – 7.66 (m, 2H), 7.61 (td,  $J = 7.8, 7.0, 4.8$  Hz, 1H), 7.47 – 7.37 (m, 1H), 5.95 (s, 1H), 5.59 – 5.54 (m, 1H), 5.47 (m, 1H), 4.60 – 4.56 (m, 2H), 4.28 (d,  $J = 8.2$  Hz, 1H), 3.77 (d,  $J = 1.8$  Hz, 3H).  $^{13}\text{C}$  NMR (101 MHz,  $\text{CDCl}_3$ )  $\delta$  171.25, 138.38, 133.22, 132.60, 129.59, 128.87, 128.20, 126.07, 117.64, 113.56, 87.55, 75.92, 55.08, 52.51. HRMS (ESI)  $m/z$ :  $[\text{M} + \text{H}]^+$  Calcd for  $\text{C}_{14}\text{H}_{13}\text{O}_3\text{N}$ : 244.0968; Found: 244.0971.

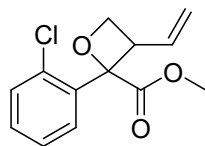

**Compound 3e major:**  $^1\text{H}$  NMR (400 MHz,  $\text{CDCl}_3$ )  $\delta$  7.59 (ddd,  $J = 7.5, 3.4, 1.9$  Hz, 1H), 7.42 (ddd,  $J = 13.8, 7.6, 1.8$  Hz, 1H), 7.30 – 7.22 (m, 2H), 6.00 – 5.96 (m, 1H), 5.94 – 5.85 (m, 1H), 5.59 – 5.52 (m, 1H), 4.64 – 4.47 (m, 2H), 4.45 (d,  $J = 6.0$  Hz, 1H), 3.75 (s, 3H).  $^{13}\text{C}$  NMR (101 MHz,  $\text{CDCl}_3$ )  $\delta$  171.84, 134.48, 133.54, 131.69, 130.30, 129.38, 128.66, 128.29, 127.28, 126.85, 86.85, 75.87, 52.94, 52.24. **Compound 3e minor:**  $^1\text{H}$  NMR (400 MHz,  $\text{CDCl}_3$ )  $\delta$

7.59 (ddd,  $J = 7.5, 3.4, 1.9$  Hz, 1H), 7.42 (ddd,  $J = 13.8, 7.6, 1.8$  Hz, 1H), 7.30 – 7.22 (m, 2H), 5.94 – 5.85 (m, 1H), 5.59 – 5.52 (m, 1H), 5.49 – 5.42 (m, 1H), 4.80 – 4.67 (m, 2H), 4.40 (d,  $J = 8.8$  Hz, 1H), 3.75 (s, 3H).  $^{13}\text{C NMR}$  (101 MHz,  $\text{CDCl}_3$ )  $\delta$  172.13, 134.29, 133.06, 130.64, 129.92, 128.88, 128.46, 127.18, 126.93, 87.74, 75.90, 52.35, 52.32. **HRMS (ESI)**  $m/z$ :  $[\text{M} + \text{H}]^+$  Calcd for  $\text{C}_{13}\text{H}_{13}\text{O}_3\text{Cl}$ : 253.0626; Found: 253.0624.

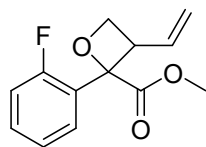

**Compound 3f major:**  $^1\text{H NMR}$  (400 MHz,  $\text{CDCl}_3$ )  $\delta$  7.51 (q,  $J = 8.6, 7.7$  Hz, 1H), 7.29 (d,  $J = 7.0$  Hz, 1H), 7.20 – 7.03 (m, 2H), 5.97 – 5.92 (m, 1H), 5.89 (d,  $J = 1.6$  Hz, 1H), 5.55 – 5.44 (m, 1H), 4.65 (s, 3H), 4.13 (d,  $J = 8.4$  Hz, 1H), 3.76 (d,  $J = 1.7$  Hz, 4H).  $^{13}\text{C NMR}$  (101 MHz,  $\text{CDCl}_3$ )  $\delta$  171.98, 161.53, 161.45, 137.30, 137.22, 130.15, 130.06, 128.50, 126.97, 124.60, 124.29, 114.58 (dd,  $J = 25.7, 21.1$  Hz), 87.51, 75.68, 57.80, 52.25.  $^{19}\text{F NMR}$  (376 MHz,  $\text{CDCl}_3$ )  $\delta$  -116.83. **Compound 3f minor:**  $^1\text{H NMR}$  (400 MHz,  $\text{CDCl}_3$ )  $\delta$  7.51 (q,  $J = 8.6, 7.7$  Hz, 1H), 7.29 (d,  $J = 7.0$  Hz, 1H), 7.20 – 7.03 (m, 2H), 5.89 (d,  $J = 1.6$  Hz, 1H), 5.65 – 5.59 (m, 1H), 5.55 – 5.44 (m, 1H), 4.59 (dd,  $J = 12.8, 3.4$  Hz, 1H), 4.47 (dd,  $J = 13.0, 6.2$  Hz, 1H), 4.17 (d,  $J = 6.0$  Hz, 1H), 3.76 (d,  $J = 1.7$  Hz, 3H).  $^{13}\text{C NMR}$  (101 MHz,  $\text{CDCl}_3$ )  $\delta$  171.66, 163.98, 163.90, 138.22, 138.14, 129.82, 129.73, 128.48, 127.48, 124.58, 124.26, 115.68 (dd,  $J = 37.7, 22.1$  Hz), 87.12, 75.68, 56.82, 52.17.  $^{19}\text{F NMR}$  (376 MHz,  $\text{CDCl}_3$ )  $\delta$  -118.03. **HRMS (ESI)**  $m/z$ :  $[\text{M} + \text{K}]^+$  Calcd for  $\text{C}_{13}\text{H}_{13}\text{O}_3\text{F}$ : 275.0480; Found: 275.0477.

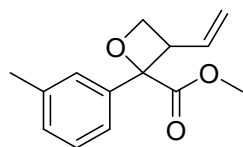

**Compound 3g major:**  $^1\text{H NMR}$  (400 MHz,  $\text{CDCl}_3$ )  $\delta$  7.28 – 7.10 (m, 8H), 5.92 (m, 2H), 5.52 (m, 2H), 5.48 – 5.38 (m, 2H), 4.76 – 4.64 (m, 4H), 3.75 (s, 6H), 3.62 (d,  $J = 9.5$  Hz, 2H), 2.38 (d,  $J = 2.4$  Hz, 6H).  $^{13}\text{C NMR}$  (101 MHz,  $\text{CDCl}_3$ )  $\delta$  172.68, 138.48, 134.97, 129.10, 128.57, 128.44, 128.23, 127.55, 125.53, 87.77, 87.35, 75.69, 58.27, 52.18, 21.46. **Compound 3g minor:**  $^1\text{H NMR}$  (400 MHz,  $\text{CDCl}_3$ )  $\delta$  7.28 – 7.10 (m, 4H), 5.97 (dt,  $J = 6.3, 1.7$  Hz, 1H), 5.92 (m, 1H), 5.48 – 5.38 (m, 1H), 4.63 – 4.58 (m, 2H), 3.72 (s, 3H), 3.66 (d,  $J = 7.8$  Hz, 1H), 2.38 (d,  $J = 2.4$  Hz, 3H).  $^{13}\text{C NMR}$  (101 MHz,  $\text{CDCl}_3$ )  $\delta$  172.36, 138.16, 135.88, 129.41, 128.64, 128.41, 128.07, 127.98, 125.79, 87.77, 87.35, 75.61, 57.22, 52.06, 21.53. **HRMS (ESI)**  $m/z$ :  $[\text{M} + \text{H}]^+$  Calcd for  $\text{C}_{14}\text{H}_{16}\text{O}_3$ : 233.1172; Found: 233.1173.

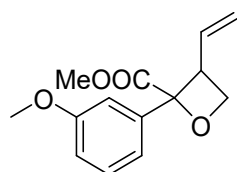

**Compound 3h major:**  $^1\text{H NMR}$  (400 MHz,  $\text{CDCl}_3$ )  $\delta$  7.28 (d,  $J = 2.9$  Hz,

1H), 6.97 (t,  $J = 8.5$  Hz, 1H), 6.92 (s, 1H), 6.87 (d,  $J = 8.4$  Hz, 1H), 5.96 (dd,  $J = 15.4, 6.1$  Hz, 1H), 5.57 – 5.52 (m, 1H), 5.44 (m, 1H), 4.76 – 4.64 (m, 2H), 3.84 (s, 3H), 3.76 (s, 3H), 3.63 (d,  $J = 9.4$  Hz, 1H).  $^{13}\text{C}$  NMR (101 MHz,  $\text{CDCl}_3$ )  $\delta$  172.48, 159.81, 136.50, 129.76, 128.16, 127.47, 120.87, 114.12, 113.21, 87.72, 75.72, 58.32, 55.29, 52.24. **Compound 3h minor:**  $^1\text{H}$  NMR (400 MHz,  $\text{CDCl}_3$ )  $\delta$  7.26 (d,  $J = 2.9$  Hz, 1H), 6.97 (t,  $J = 8.5$  Hz, 1H), 6.92 (s, 1H), 6.87 (d,  $J = 8.4$  Hz, 1H), 5.96 (dd,  $J = 15.4, 6.1$  Hz, 1H), 5.57 – 5.52 (m, 1H), 5.44 (m, 1H), 4.64 – 4.60 (m, 2H), 3.84 (s, 3H), 3.73 (s, 3H), 3.68 (d,  $J = 7.6$  Hz, 1H).  $^{13}\text{C}$  NMR (101 MHz,  $\text{CDCl}_3$ )  $\delta$  172.15, 159.62, 137.43, 129.49, 128.32, 127.88, 121.20, 114.55, 112.99, 87.32, 75.66, 57.22, 55.24, 52.12. **HRMS (ESI)**  $m/z$ :  $[\text{M} + \text{H}]^+$  Calcd for  $\text{C}_{14}\text{H}_{16}\text{O}_4$ : 249.1121; Found: 249.1123.

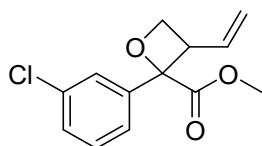

**Compound 3i major:**  $^1\text{H}$  NMR (400 MHz,  $\text{CDCl}_3$ )  $\delta$  7.39 (d,  $J = 10.0$  Hz, 1H), 7.31 (d,  $J = 1.5$  Hz, 1H), 7.30 – 7.23 (m, 2H), 6.00 – 5.93 (m, 1H), 5.58 – 5.53 (m, 1H), 5.42 (dt,  $J = 4.1, 1.7$  Hz, 1H), 4.73 – 4.63 (m, 3H), 3.77 (s, 4H), 3.67 (dd,  $J = 8.0, 6.3$  Hz, 1H).  $^{13}\text{C}$  NMR (101 MHz,  $\text{CDCl}_3$ )  $\delta$  172.02, 136.91, 134.55, 129.96, 128.70, 128.65, 128.05, 127.14, 126.80, 87.56, 75.78, 57.80, 52.38. **Compound 3i minor:**  $^1\text{H}$  NMR (400 MHz,  $\text{CDCl}_3$ )  $\delta$  7.39 (d,  $J = 10.0$  Hz, 1H), 7.31 (d,  $J = 1.5$  Hz, 1H), 7.30 – 7.23 (m, 2H), 6.00 – 5.93 (m, 1H), 5.88 – 5.84 (m, 1H), 5.42 (dt,  $J = 4.1, 1.7$  Hz, 1H), 4.60 (q,  $J = 3.9, 3.0$  Hz, 2H), 3.75 (s, 3H), 3.67 (dd,  $J = 8.0, 6.3$  Hz, 1H).  $^{13}\text{C}$  NMR (101 MHz,  $\text{CDCl}_3$ )  $\delta$  171.70, 137.81, 134.28, 129.68, 129.12, 128.60, 127.79, 127.53, 127.00, 87.13, 75.78, 56.85, 52.30. **HRMS (ESI)**  $m/z$ :  $[\text{M} + \text{H}]^+$  Calcd for  $\text{C}_{13}\text{H}_{13}\text{O}_3\text{Cl}$ : 253.0626; Found: 253.0624.

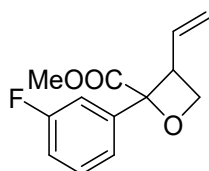

**Compound 3j major:**  $^1\text{H}$  NMR (400 MHz,  $\text{CDCl}_3$ )  $\delta$  7.36 – 7.29 (m, 1H), 7.17 – 7.09 (m, 2H), 7.01 (m, 1H), 5.96 (m, 1H), 5.55 (m, 1H), 5.45 – 5.38 (m, 1H), 4.73 – 4.62 (m, 3H), 3.76 (s, 4H), 3.69 (dd,  $J = 9.3, 8.2$  Hz, 1H).  $^{13}\text{C}$  NMR (101 MHz,  $\text{CDCl}_3$ )  $\delta$  172.06, 164.06, 163.97, 137.38, 137.31, 130.22, 130.14, 128.58, 127.05, 124.70, 124.37, 114.65 (dd,  $J = 26.4, 21.0$  Hz), 87.59, 75.74, 57.87, 52.31.  $^{19}\text{F}$  NMR (376 MHz,  $\text{CDCl}_3$ )  $\delta$  -112.40. **Compound 3j minor:**  $^1\text{H}$  NMR (400 MHz,  $\text{CDCl}_3$ )  $\delta$  7.36 – 7.29 (m, 1H), 7.17 – 7.09 (m, 2H), 7.01 (m, 1H), 5.96 (m, 1H), 5.86 (m, 1H), 5.45 – 5.38 (m, 1H), 4.62 – 4.58 (m, 2H), 3.74 (s, 3H), 3.69 (dd,  $J = 9.3, 8.2$  Hz, 1H).  $^{13}\text{C}$  NMR (101 MHz,  $\text{CDCl}_3$ )  $\delta$  171.73, 161.61, 161.53, 138.81, 138.23, 129.89, 129.81, 128.55, 127.56, 124.67, 124.35, 115.76 (dd,  $J = 38.3, 22.1$  Hz), 87.19, 75.74, 56.89, 52.23.  $^{19}\text{F}$  NMR (376 MHz,  $\text{CDCl}_3$ )  $\delta$  -113.02. **HRMS (ESI)**  $m/z$ :  $[\text{M} + \text{K}]^+$  Calcd for  $\text{C}_{13}\text{H}_{13}\text{O}_3\text{F}$ :



275.0480; Found: 275.0477.

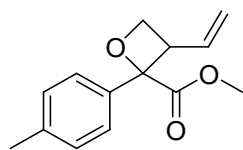

**Compound 3k major:**  $^1\text{H NMR}$  (400 MHz,  $\text{CDCl}_3$ )  $\delta$  7.27 (d,  $J = 14.9$  Hz, 3H), 7.17 (d,  $J = 8.1$  Hz, 3H), 5.98 – 5.91 (m, 2H), 5.56 – 5.51 (m, 2H), 5.42 (m, 2H), 4.74 – 4.62 (m, 3H), 3.74 (s, 5H), 3.63 (d,  $J = 9.4$  Hz, 2H), 2.36 (d,  $J = 3.2$  Hz, 5H).  $^{13}\text{C NMR}$  (101 MHz,  $\text{CDCl}_3$ )  $\delta$  172.75, 137.52, 132.06, 129.46, 128.34, 128.09, 127.52, 87.77, 75.69, 57.90, 52.16, 21.14. **Compound 3k minor:**  $^1\text{H NMR}$  (400 MHz,  $\text{CDCl}_3$ )  $\delta$  7.27 (d,  $J = 14.9$  Hz, 2H), 7.17 (d,  $J = 8.1$  Hz, 2H), 5.98 – 5.91 (m, 1H), 5.91 – 5.86 (m, 1H), 5.56 – 5.51 (m, 1H), 4.62 – 4.58 (m, 2H), 3.72 (s, 3H), 3.67 (d,  $J = 7.6$  Hz, 1H), 2.36 (d,  $J = 3.2$  Hz, 3H).  $^{13}\text{C NMR}$  (101 MHz,  $\text{CDCl}_3$ )  $\delta$  172.41, 137.21, 132.94, 129.28, 128.63, 128.24, 127.94, 87.36, 75.59, 56.83, 52.16, 21.16. **HRMS (ESI)**  $m/z$ :  $[\text{M} + \text{H}]^+$  Calcd for  $\text{C}_{14}\text{H}_{16}\text{O}_3$ : 233.1172; Found: 233.1173.

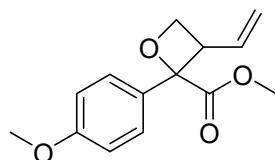

**Compound 3l major:**  $^1\text{H NMR}$  (400 MHz,  $\text{CDCl}_3$ )  $\delta$  7.33 – 7.25 (m, 4H), 6.90 (dd,  $J = 8.8, 3.0$  Hz, 4H), 5.94 (m, 2H), 5.57 – 5.52 (m, 2H), 5.41 (m, 2H), 4.68 (m, 4H), 3.83 (s, 6H), 3.74 (s, 6H), 3.61 (d,  $J = 9.3$  Hz, 2H).  $^{13}\text{C NMR}$  (101 MHz,  $\text{CDCl}_3$ )  $\delta$  172.86, 159.20, 129.54, 128.14, 127.88, 127.51, 114.31, 114.14, 113.97, 87.82, 75.70, 57.40, 55.30, 52.14. **Compound 3l minor:**  $^1\text{H NMR}$  (400 MHz,  $\text{CDCl}_3$ )  $\delta$  7.33 – 7.25 (m, 2H), 6.90 (dd,  $J = 8.8, 3.0$  Hz, 2H), 5.94 (m, 1H), 5.89 – 5.85 (m, 1H), 5.41 (m, 1H), 4.59 (dt,  $J = 3.9, 2.0$  Hz, 2H), 3.82 (s, 3H), 3.72 (s, 3H), 3.66 (d,  $J = 7.4$  Hz, 1H).  $^{13}\text{C NMR}$  (101 MHz,  $\text{CDCl}_3$ )  $\delta$  172.54, 158.99, 129.86, 128.24, 128.00, 127.18, 114.31, 114.14, 113.97, 87.38, 75.63, 56.33, 55.26, 52.06. **HRMS (ESI)**  $m/z$ :  $[\text{M} + \text{H}]^+$  Calcd for  $\text{C}_{14}\text{H}_{16}\text{O}_4$ : 249.1121; Found: 249.1123.

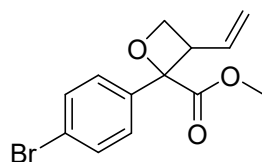

**Compound 3m major:**  $^1\text{H NMR}$  (400 MHz,  $\text{CDCl}_3$ )  $\delta$  7.51 – 7.46 (m, 3H), 7.29 – 7.22 (m, 3H), 5.95 (dd,  $J = 4.3, 2.0$  Hz, 2H), 5.58 – 5.53 (m, 2H), 5.41 (m, 2H), 4.66 (dt,  $J = 4.5, 2.0$  Hz, 3H), 3.75 (s, 4H), 3.68 – 3.64 (m, 2H).  $^{13}\text{C NMR}$  (101 MHz,  $\text{CDCl}_3$ )  $\delta$  172.13, 134.02, 131.83, 130.30, 128.64, 126.99, 121.91, 87.51, 75.75, 57.53, 52.31. **Compound 3m minor:**  $^1\text{H NMR}$  (400 MHz,  $\text{CDCl}_3$ )  $\delta$  7.51 – 7.46 (m, 2H), 7.29 – 7.22 (m, 2H), 5.95 (dd,  $J = 4.3, 2.0$  Hz, 1H), 5.85 (ddt,  $J = 6.1, 3.6, 1.9$  Hz, 1H), 5.41 (m, 1H), 4.63 – 4.52 (m, 2H), 3.74 (s, 3H), 3.68 – 3.64 (m, 1H).  $^{13}\text{C NMR}$  (101 MHz,  $\text{CDCl}_3$ )  $\delta$  171.81, 134.87, 131.58, 130.68, 128.56,

127.54 , 121.70, 87.10 , 75.75 , 56.59 , 52.25 . **HRMS (ESI)** m/z: [M + H]<sup>+</sup> Calcd for C<sub>13</sub>H<sub>13</sub>O<sub>3</sub>Br: 297.0121; Found: 297.0127.

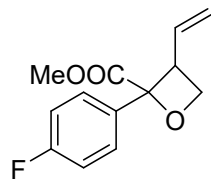

**Compound 3n major:** <sup>1</sup>H NMR (400 MHz, CDCl<sub>3</sub>) δ 7.38 – 7.31 (m, 5H), 7.08 – 7.01 (m, 5H), 5.95 (m, 3H), 5.85 (m, 1H), 5.54 (m, 2H), 5.44 – 5.37 (m, 3H), 4.66 (m, 3H), 4.58 (m, 2H), 3.75 (s, 5H), 3.74 (s, 3H), 3.71 – 3.66 (m, 3H). <sup>13</sup>C NMR (101 MHz, CDCl<sub>3</sub>) δ 172.45 , 163.64, 163.51, 130.85 , 130.81, 130.21 , 130.13 , 128.51 , 127.64 , 127.12 , 115.61 (d, *J* = 21.3 Hz), 87.70 , 75.74 , 57.33 , 52.25 . <sup>19</sup>F NMR (376 MHz, CDCl<sub>3</sub>) δ -114.60 . **Compound 3n minor:** <sup>1</sup>H NMR (400 MHz, CDCl<sub>3</sub>) δ 7.38 – 7.31 (m, 5H), 7.08 – 7.01 (m, 5H), 5.95 (m, 3H), 5.85 (m, 1H), 5.54 (m, 2H), 5.44 – 5.37 (m, 3H), 4.66 (m, 3H), 4.58 (m, 2H), 3.75 (s, 5H), 3.74 (s, 3H), 3.71 – 3.66 (m, 3H). <sup>13</sup>C NMR (101 MHz, CDCl<sub>3</sub>) δ 172.13, 161.19, 161.07, 131.63, 131.59, 130.54 , 130.46 , 128.45 , 127.64 , 127.12 , 115.36 (d, *J* = 21.4 Hz), 87.26 , 75.71 , 56.36 , 52.18 . <sup>19</sup>F NMR (376 MHz, CDCl<sub>3</sub>) δ -115.22 . **HRMS (ESI)** m/z: [M + K]<sup>+</sup> Calcd for C<sub>13</sub>H<sub>13</sub>O<sub>3</sub>F: 275.0480; Found: 275.0477.

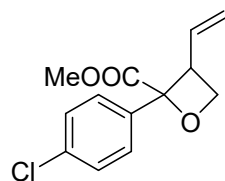

**Compound 3o major:** <sup>1</sup>H NMR (400 MHz, CDCl<sub>3</sub>) δ 7.32 (d, *J* = 7.5 Hz, 6H), 5.97 – 5.92 (m, 1H), 5.55 (dh, *J* = 4.9, 1.4 Hz, 1H), 5.41 (m, 1H), 4.65 (dt, *J* = 4.5, 2.0 Hz, 3H), 3.75 (s, 4H), 3.68 (dd, *J* = 7.9, 3.4 Hz, 1H). <sup>13</sup>C NMR (101 MHz, CDCl<sub>3</sub>) δ 172.20 , 134.36, 133.52 , 129.96 , 128.62 , 128.54 , 127.02 , 87.58 , 75.74 , 57.47 , 52.28 . **Compound 3o minor:** <sup>1</sup>H NMR (400 MHz, CDCl<sub>3</sub>) δ 7.32 (d, *J* = 7.5 Hz, 4H), 5.97 – 5.92 (m, 1H), 5.84 (m, 1H), 5.41 (m, 1H), 4.63 – 4.53 (m, 2H), 3.74 (s, 3H), 3.68 (dd, *J* = 7.9, 3.4 Hz, 1H). <sup>13</sup>C NMR (101 MHz, CDCl<sub>3</sub>) δ 171.89, 134.36, 133.77, 130.33 , 128.87 , 128.54 , 127.56 , 87.16 , 75.74 , 56.52 , 52.22 . **HRMS (ESI)** m/z: [M + H]<sup>+</sup> Calcd for C<sub>13</sub>H<sub>13</sub>O<sub>3</sub>Cl: 253.0626; Found: 253.0624.

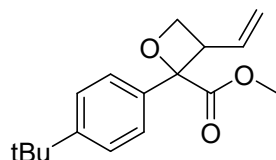

**Compound 3p major:** <sup>1</sup>H NMR (400 MHz, CDCl<sub>3</sub>) δ 7.38 (dd, *J* = 8.2, 5.5 Hz, 4H), 7.28 (d, *J* = 8.6 Hz, 4H). 5.92 (td, *J* = 6.2, 1.8 Hz, 2H), 5.55 (dd, *J* = 6.4, 1.6 Hz, 2H), 5.43 (m, 2H), 4.71 (m, 4H), 3.75 (s, 6H), 3.63 (d, *J* = 9.5 Hz, 2H), 1.34 (d, *J* = 1.9 Hz, 18H). <sup>13</sup>C NMR (101 MHz, CDCl<sub>3</sub>) δ 172.75, 150.67, 131.96 , 128.06 , 127.99 , 125.68 , 87.86 , 75.69 , 57.92 , 52.15 , 34.54 , 31.36 . **Compound 3p minor:** <sup>1</sup>H NMR (400 MHz, CDCl<sub>3</sub>) δ 7.38 (dd, *J* = 8.2,

5.5 Hz, 2H), 7.33 (d,  $J = 8.3$  Hz, 2H), 6.01 – 5.97 (m, 1H), 5.92 (td,  $J = 6.2, 1.8$  Hz, 1H), 5.43 (m, 1H), 4.65 – 4.61 (m, 2H), 3.72 (s, 3H), 3.69 (d,  $J = 8.0$  Hz, 1H), 1.34 (d,  $J = 1.9$  Hz, 9H).  **$^{13}\text{C}$  NMR (101 MHz,  $\text{CDCl}_3$ )**  $\delta$  172.44, 150.23, 132.89, 128.22, 127.66, 125.56, 87.44, 75.60, 56.87, 52.02, 34.54, 31.36. **HRMS (ESI)**  $m/z$ :  $[\text{M} + \text{H}]^+$  Calcd for  $\text{C}_{17}\text{H}_{22}\text{O}_3\text{Cl}$ : 275.1642; Found: 275.1645.

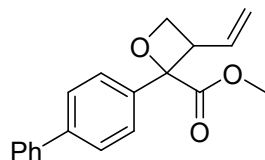

**Compound 3q major:**  **$^1\text{H}$  NMR (400 MHz,  $\text{CDCl}_3$ )**  $\delta$  7.66 – 7.55 (m, 6H),

7.51 – 7.34 (m, 7H), 5.98 – 5.90 (m, 1H), 5.60 (dq,  $J = 6.3, 2.1$  Hz, 1H), 5.48 (d,  $J = 1.6$  Hz, 1H), 4.71 (m, 3H), 3.78 (s, 4H), 3.72 (d,  $J = 9.2$  Hz, 1H).  **$^{13}\text{C}$  NMR (101 MHz,  $\text{CDCl}_3$ )**  $\delta$  172.56, 140.71, 140.59, 135.00, 128.93, 128.85, 128.41, 128.30, 127.86, 127.45, 127.32, 127.09, 87.79, 75.76, 57.96, 52.27. **Compound 3q minor:**  **$^1\text{H}$  NMR (400 MHz,  $\text{CDCl}_3$ )**  $\delta$  7.66 – 7.55 (m, 4H), 7.51 – 7.34 (m, 5H), 5.99 (dd,  $J = 6.2, 1.9$  Hz, 1H), 5.98 – 5.90 (m, 2H), 5.48 (d,  $J = 1.6$  Hz, 1H), 4.64 (dt,  $J = 4.1, 1.9$  Hz, 2H), 3.76 (s, 4H).  **$^{13}\text{C}$  NMR (101 MHz,  $\text{CDCl}_3$ )**  $\delta$  172.25, 140.86, 140.47, 134.07, 129.19, 128.77, 128.41, 128.30, 127.86, 127.15, 87.36, 75.70, 56.97, 52.17. **HRMS (ESI)**  $m/z$ :  $[\text{M} + \text{H}]^+$  Calcd for  $\text{C}_{19}\text{H}_{18}\text{O}_3$ : 295.1328; Found: 295.1330.

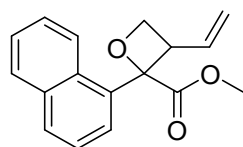

**Compound 3r major:**  **$^1\text{H}$  NMR (400 MHz,  $\text{CDCl}_3$ )**  $\delta$  8.17 (dd,  $J = 14.0, 8.4$

Hz, 3H), 7.94 – 7.88 (m, 3H), 7.84 (dd,  $J = 8.2, 2.6$  Hz, 3H), 7.71 (t,  $J = 7.5$  Hz, 3H), 7.54 (tt,  $J = 15.4, 7.8$  Hz, 9H), 6.04 – 5.97 (m, 2H), 5.90 (dq,  $J = 6.0, 1.8$  Hz, 2H), 5.74 – 5.62 (m, 3H), 5.39 – 5.33 (m, 2H), 4.80 (dt,  $J = 6.4, 1.9$  Hz, 1H), 4.73 (m, 2H), 4.65 – 4.60 (m, 3H), 4.58 (d,  $J = 9.2$  Hz, 2H), 3.74 (s, 5H), 3.71 (s, 3H).  **$^{13}\text{C}$  NMR (101 MHz,  $\text{CDCl}_3$ )**  $\delta$  173.03, 172.68, 134.22, 134.13, 132.30, 131.80, 131.53, 129.16, 129.07, 128.41, 128.36, 128.26, 128.21, 127.71, 126.67, 126.45, 125.94, 125.90, 125.69, 125.59, 123.53, 123.29, 88.33, 87.36, 75.90, 75.74, 52.40, 52.25, 52.02. **Compound 3r minor:**  **$^1\text{H}$  NMR (400 MHz,  $\text{CDCl}_3$ )**  $\delta$  8.17 (dd,  $J = 14.0, 8.4$  Hz, 3H), 7.94 – 7.88 (m, 3H), 7.84 (dd,  $J = 8.2, 2.6$  Hz, 3H), 7.71 (t,  $J = 7.5$  Hz, 3H), 7.54 (tt,  $J = 15.4, 7.8$  Hz, 9H), 6.04 – 5.97 (m, 2H), 5.90 (dq,  $J = 6.0, 1.8$  Hz, 2H), 5.74 – 5.62 (m, 3H), 5.39 – 5.33 (m, 2H), 4.80 (dt,  $J = 6.4, 1.9$  Hz, 1H), 4.73 (m, 2H), 4.65 – 4.60 (m, 3H), 4.58 (d,  $J = 9.2$  Hz, 2H), 3.74 (s, 5H), 3.71 (s, 3H).  **$^{13}\text{C}$  NMR (101 MHz,  $\text{CDCl}_3$ )**  $\delta$  **HRMS (ESI)**  $m/z$ :  $[\text{M} + \text{H}]^+$  Calcd for  $\text{C}_{17}\text{H}_{16}\text{O}_3$ : 269.1172; Found: 269.1173.

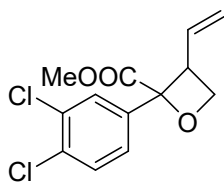

**Compound 3s major:**  $^1\text{H NMR}$  (400 MHz,  $\text{CDCl}_3$ )  $\delta$  7.48 (d,  $J = 6.5$  Hz, 1H), 7.43 (dt,  $J = 8.5, 1.7$  Hz, 1H), 7.22 (t,  $J = 8.6$  Hz, 1H), 6.00 – 5.94 (m, 1H), 5.58 (dq,  $J = 6.9, 1.6$  Hz, 1H), 5.39 (dt,  $J = 15.0, 4.9$  Hz, 1H), 4.68 – 4.62 (m, 3H), 3.76 (s, 4H), 3.65 (t,  $J = 7.0$  Hz, 1H).  $^{13}\text{C NMR}$  (101 MHz,  $\text{CDCl}_3$ )  $\delta$  171.72, 135.13, 132.74, 132.06, 130.61, 130.57, 128.99, 128.06, 126.71, 87.40, 75.81, 57.07, 52.43. **Compound 3s minor:**  $^1\text{H NMR}$  (400 MHz,  $\text{CDCl}_3$ )  $\delta$  7.48 (d,  $J = 6.5$  Hz, 1H), 7.43 (dt,  $J = 8.5, 1.7$  Hz, 1H), 7.22 (t,  $J = 8.6$  Hz, 1H), 6.00 – 5.94 (m, 1H), 5.82 (m, 1H), 5.39 (dt,  $J = 15.0, 4.9$  Hz, 1H), 4.61 – 4.52 (m, 2H), 3.75 (s, 3H), 3.65 (t,  $J = 7.0$  Hz, 1H).  $^{13}\text{C NMR}$  (101 MHz,  $\text{CDCl}_3$ )  $\delta$  171.40, 136.00, 132.45, 131.77, 131.05, 130.31, 128.78, 128.43, 127.31, 87.02, 75.83, 56.28, 52.39. **HRMS (ESI)**  $m/z$ :  $[\text{M} + \text{H}]^+$  Calcd for  $\text{C}_{13}\text{H}_{12}\text{O}_3\text{Cl}_2$ : 287.0236; Found: 287.0237.

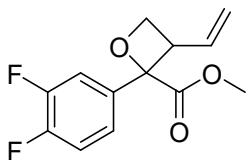

**Compound 3t major:**  $^1\text{H NMR}$  (400 MHz,  $\text{CDCl}_3$ )  $\delta$  7.25 (dddd,  $J = 11.3, 9.6, 7.6, 2.2$  Hz, 1H), 7.19 – 7.04 (m, 2H), 5.96 (dq,  $J = 5.3, 1.7$  Hz, 1H), 5.56 (dq,  $J = 6.3, 2.2$  Hz, 1H), 5.37 (dddd,  $J = 13.4, 8.9, 4.0, 2.0$  Hz, 1H), 4.65 (ddt,  $J = 4.3, 2.8, 1.4$  Hz, 2H), 3.76 (s, 3H), 3.65 (s, 1H).  $^{13}\text{C NMR}$  (101 MHz,  $\text{CDCl}_3$ )  $\delta$  171.97, 149.05, 148.92, 148.83, 148.71, 148.58, 131.94, 131.90, 131.88, 131.84, 128.88, 126.76, 124.84 (dd,  $J = 6.4, 3.6$  Hz), 117.82 (dd,  $J = 39.9, 17.9$  Hz), 87.54, 75.81, 57.12, 52.39.  $^{19}\text{F NMR}$  (376 MHz,  $\text{CDCl}_3$ )  $\delta$  -109.14, -109.16, -109.18. **Compound 3t minor:**  $^1\text{H NMR}$  (400 MHz,  $\text{CDCl}_3$ )  $\delta$  7.25 (dddd,  $J = 11.3, 9.6, 7.6, 2.2$  Hz, 1H), 7.19 – 7.04 (m, 2H), 5.96 (dq,  $J = 5.3, 1.7$  Hz, 1H), 5.82 (dq,  $J = 6.2, 2.2$  Hz, 1H), 5.37 (dddd,  $J = 13.4, 8.9, 4.0, 2.0$  Hz, 1H), 4.61 – 4.53 (m, 2H), 3.75 (s, 3H), 3.67 (s, 1H).  $^{13}\text{C NMR}$  (101 MHz,  $\text{CDCl}_3$ )  $\delta$  171.63, 151.52, 151.40, 151.30, 151.18, 151.05, 132.79, 132.76, 132.74, 132.69, 128.69, 127.35, 125.16 (dd,  $J = 6.3, 3.6$  Hz), 117.24 (dd,  $J = 33.3, 17.2$  Hz), 87.15, 75.81, 56.24, 52.35.  $^{19}\text{F NMR}$  (376 MHz,  $\text{CDCl}_3$ )  $\delta$  -109.88, -109.90, -109.92. **HRMS (ESI)**  $m/z$ :  $[\text{M} + \text{H}]^+$  Calcd for  $\text{C}_{13}\text{H}_{12}\text{O}_3\text{F}_2$ : 255.0827; Found: 255.0829.

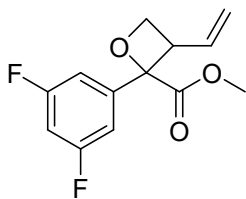

**Compound 3u major:**  $^1\text{H NMR}$  (400 MHz,  $\text{CDCl}_3$ )  $\delta$  6.93 (td,  $J = 7.9, 2.1$  Hz, 2H), 6.77 (m, 1H), 5.98 (dt,  $J = 6.3, 1.8$  Hz, 1H), 5.58 (dq,  $J = 6.3, 2.3$  Hz, 1H), 5.38 (m, 1H),

4.66 (dt,  $J = 4.4, 2.0$  Hz, 2H), 3.77 (s, 3H), 3.68 (s, 1H).  $^{13}\text{C}$  NMR (101 MHz,  $\text{CDCl}_3$ )  $\delta$  171.53 , 161.67 (t,  $J = 13.1$  Hz), 138.56 (t,  $J = 9.2$  Hz), 128.95 , 126.70 , 111.89 (dd,  $J = 34.3, 25.7$  Hz), 87.41 , 75.80 , 57.66 , 52.44 .  $^{19}\text{F}$  NMR (376 MHz,  $\text{CDCl}_3$ )  $\delta$  -108.42 , -108.44 , -108.46 , -109.14 , -109.17 , -109.19 . **Compound 3u minor:**  $^1\text{H}$  NMR (400 MHz,  $\text{CDCl}_3$ )  $\delta$  6.93 (td,  $J = 7.9, 2.1$  Hz, 2H), 6.77 (m, 1H), 5.98 (dt,  $J = 6.3, 1.8$  Hz, 1H), 5.83 (dq,  $J = 6.3, 2.3$  Hz, 1H), 5.38 (m, 1H), 4.62 (dt,  $J = 4.0, 2.1$  Hz, 2H), 3.76 (s, 3H), 3.66 (s, 1H).  $^{13}\text{C}$  NMR (101 MHz,  $\text{CDCl}_3$ )  $\delta$  171.19 , 164.14 (t,  $J = 13.5$  Hz), 139.45 (d,  $J = 9.5$  Hz), 128.80 , 127.29 , 103.22 (q,  $J = 25.1$  Hz). 87.06 , 75.80 , 56.83 , 52.38 .  $^{19}\text{F}$  NMR (376 MHz,  $\text{CDCl}_3$ )  $\delta$  -108.33 , -108.36 , -108.38 , -109.89 , -109.91 , -109.93 . **HRMS (ESI)**  $m/z$ :  $[\text{M} + \text{H}]^+$  Calcd for  $\text{C}_{13}\text{H}_{12}\text{O}_3\text{F}_2$ : 255.0827; Found: 255.0829.  $^{13}\text{C}$  NMR (101 MHz, Chloroform-d)  $\delta$

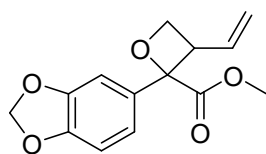

**Compound 3v major:**  $^1\text{H}$  NMR (400 MHz,  $\text{CDCl}_3$ )  $\delta$  6.89 (d,  $J = 1.3$  Hz, 1H), 6.79 (d,  $J = 1.4$  Hz, 3H), 6.00 – 5.92 (m, 4H), 5.57 (m, 1H), 5.38 (m, 1H), 4.70 (dp,  $J = 8.3, 1.8$  Hz, 3H), 3.76 (s, 4H), 3.57 (dd,  $J = 9.3, 1.1$  Hz, 1H).  $^{13}\text{C}$  NMR (101 MHz,  $\text{CDCl}_3$ )  $\delta$  172.65, 147.90, 147.22, 129.64, 128.25, 127.40, 121.96, 108.72, 108.48, 101.20, 87.77, 57.81, 52.24. **Compound 3v minor:**  $^1\text{H}$  NMR (400 MHz,  $\text{CDCl}_3$ )  $\delta$  6.94 (d,  $J = 1.7$  Hz, 1H), 6.81 (q,  $J = 1.3$  Hz, 2H), 6.00 – 5.92 (m, 3H), 5.87 (m, 1H), 5.38 (m, 1H), 4.64 – 4.59 (m, 2H), 3.73 (s, 3H), 3.61 (dd,  $J = 7.6, 1.2$  Hz, 1H).  $^{13}\text{C}$  NMR (101 MHz,  $\text{CDCl}_3$ )  $\delta$  172.31, 147.77, 147.06, 128.72, 128.34, 127.81, 122.27, 109.08, 108.30, 101.12, 87.38, 75.66, 75.73, 56.81, 52.15. **HRMS (ESI)**  $m/z$ :  $[\text{M} + \text{H}]^+$  Calcd for  $\text{C}_{14}\text{H}_{14}\text{O}_5$ : 263.0914; Found: 263.0913.

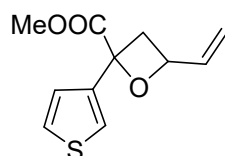

**Compound 3w major:**  $^1\text{H}$  NMR (400 MHz,  $\text{CDCl}_3$ )  $\delta$  7.25 (m, 2H), 7.10 (dd,  $J = 4.9, 1.3$  Hz, 2H), 5.95 (dt,  $J = 6.4, 1.7$  Hz, 1H), 5.61 (m, 1H), 5.39 (m, 1H), 4.73 – 4.64 (m, 3H), 3.84 (d,  $J = 9.0$  Hz, 2H), 3.77 (s, 5H).  $^{13}\text{C}$  NMR (101 MHz,  $\text{CDCl}_3$ )  $\delta$  172.29 , 135.04 , 128.34 , 127.64 , 127.45 , 125.86 , 122.94 , 87.56 , 75.76 , 53.71 , 52.24 . **Compound 3w minor:**  $^1\text{H}$  NMR (400 MHz,  $\text{CDCl}_3$ )  $\delta$  7.32 (dt,  $J = 4.8, 2.4$  Hz, 2H), 7.14 (dd,  $J = 5.0, 1.3$  Hz, 1H), 5.95 (dt,  $J = 6.4, 1.7$  Hz, 1H), 5.83 (m, 1H), 5.39 (m, 1H), 4.63 – 4.60 (m, 2H), 3.92 (d,  $J = 6.5$  Hz, 1H), 3.75 (s, 3H).  $^{13}\text{C}$  NMR (101 MHz,  $\text{CDCl}_3$ )  $\delta$  171.94 , 135.69 , 128.39 , 128.07 , 127.49 , 125.39 , 123.18 , 87.29 , 75.83 , 52.55 , 52.17 . **HRMS (ESI)**  $m/z$ :  $[\text{M} + \text{H}]^+$  Calcd for  $\text{C}_{11}\text{H}_{12}\text{O}_3\text{S}$ : 225.0580; Found: 225.0580.

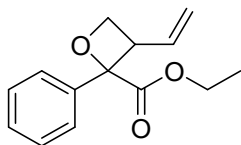

**Compound 3x major:**  $^1\text{H NMR}$  (400 MHz,  $\text{CDCl}_3$ )  $\delta$  7.41 – 7.30 (m, 7H), 5.92 (d,  $J = 7.2$  Hz, 3H), 5.54 (d,  $J = 6.3$  Hz, 2H), 5.44 (dp,  $J = 10.3, 5.2$  Hz, 2H), 4.69 (d,  $J = 3.8$  Hz, 3H), 4.29 – 4.13 (m, 3H), 3.66 (d,  $J = 9.2$  Hz, 2H), 1.27 (t,  $J = 7.2$  Hz, 5H).  $^{13}\text{C NMR}$  (101 MHz,  $\text{CDCl}_3$ )  $\delta$  172.12, 135.23, 128.69, 128.54, 128.12, 127.50, 87.81, 75.69, 61.01, 58.43, 14.14. **Compound 3x minor:**  $^1\text{H NMR}$  (400 MHz,  $\text{CDCl}_3$ )  $\delta$  7.41 – 7.30 (m, 5H), 5.97 (d,  $J = 6.5$  Hz, 1H), 5.92 (d,  $J = 7.2$  Hz, 1H), 5.44 (dp,  $J = 10.3, 5.2$  Hz, 1H), 4.60 (d,  $J = 2.8$  Hz, 2H), 4.29 – 4.13 (m, 2H), 3.69 (d,  $J = 7.6$  Hz, 1H), 1.27 (t,  $J = 7.2$  Hz, 3H).  $^{13}\text{C NMR}$  (101 MHz,  $\text{CDCl}_3$ )  $\delta$  171.78, 136.10, 128.80, 128.49, 128.25, 127.92, 127.70, 87.42, 75.62, 60.90, 57.41, 14.18. **HRMS (ESI)**  $m/z$ :  $[\text{M} + \text{H}]^+$  Calcd for  $\text{C}_{14}\text{H}_{16}\text{O}_3$ : 233.1172; Found: 233.1174.

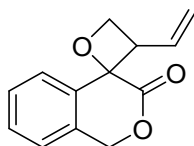

**Compound 3y major:**  $^1\text{H NMR}$  (400 MHz,  $\text{CDCl}_3$ )  $\delta$  7.37 – 7.34 (m, 9H), 5.93 (tt,  $J = 6.4, 1.8$  Hz, 2H), 5.55 (dq,  $J = 6.4, 2.3$  Hz, 2H), 5.46 (m, 2H), 5.21 – 5.13 (m, 4H), 4.69 (dt,  $J = 4.1, 2.0$  Hz, 3H), 3.74 (d,  $J = 9.1$  Hz, 2H).  $^{13}\text{C NMR}$  (101 MHz,  $\text{CDCl}_3$ )  $\delta$  171.96, 135.89, 134.99, 128.72, 128.61, 128.50, 128.10, 127.99, 127.44, 87.77, 75.71, 66.67, 58.38. **Compound 3y minor:**  $^1\text{H NMR}$  (400 MHz,  $\text{CDCl}_3$ )  $\delta$  7.37 – 7.34 (m, 5H), 5.93 (tt,  $J = 6.4, 1.8$  Hz, 1H), 5.85 (dq,  $J = 6.4, 2.3$  Hz, 1H), 5.46 (m, 1H), 5.29 – 5.22 (m, 2H), 4.58 (dq,  $J = 5.7, 2.0$  Hz, 2H), 3.77 (d,  $J = 7.5$  Hz, 1H).  $^{13}\text{C NMR}$  (101 MHz,  $\text{CDCl}_3$ )  $\delta$  171.58, 135.82, 134.99, 128.87, 128.55, 128.35, 128.25, 127.78, 127.57, 87.37, 75.65, 66.59, 57.34. **HRMS (ESI)**  $m/z$ :  $[\text{M} + \text{H}]^+$  Calcd for  $\text{C}_{14}\text{H}_{16}\text{O}_3$ : 233.1172; Found: 233.1174. **HRMS (ESI)**  $m/z$ :  $[\text{M} + \text{H}]^+$  Calcd for  $\text{C}_{13}\text{H}_{12}\text{O}_3$ : 217.0859; Found: 217.0863.

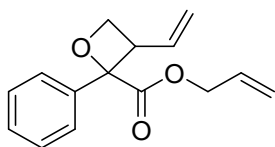

**Compound 3z major:**  $^1\text{H NMR}$  (400 MHz,  $\text{CDCl}_3$ )  $\delta$  7.43 – 7.31 (m, 7H), 5.99 – 5.85 (m, 4H), 5.54 (h,  $J = 3.7$  Hz, 2H), 5.45 (m, 2H), 5.28 (d,  $J = 17.2$  Hz, 2H), 5.22 (dd,  $J = 10.4, 7.0$  Hz, 2H), 4.75 – 4.58 (m, 6H), 3.70 (d,  $J = 9.2$  Hz, 1H).  $^{13}\text{C NMR}$  (101 MHz,  $\text{CDCl}_3$ )  $\delta$  171.76, 135.04, 132.03, 128.73, 128.55, 128.22, 127.79, 127.43, 118.14, 87.78, 75.70, 65.55, 58.39, 57.33. **Compound 3z minor:**  $^1\text{H NMR}$  (400 MHz,  $\text{CDCl}_3$ )  $\delta$  7.43 – 7.31 (m, 5H), 5.99 – 5.85 (m, 3H), 5.45 (m, 1H), 5.28 (d,  $J = 17.2$  Hz, 1H), 5.22 (dd,  $J = 10.4, 7.0$  Hz, 1H), 4.75 – 4.58 (m, 4H), 3.74 (d,  $J = 7.5$  Hz, 1H).  $^{13}\text{C NMR}$  (101 MHz,  $\text{CDCl}_3$ )  $\delta$  171.42, 135.89, 131.91, 128.84, 128.51, 128.33, 127.83, 127.56, 118.38, 87.37, 75.65, 65.43, 58.39, 57.33. **HRMS (ESI)**

m/z: [M + H]<sup>+</sup> Calcd for C<sub>15</sub>H<sub>16</sub>O<sub>3</sub>: 245.1172; Found: 245.1174.

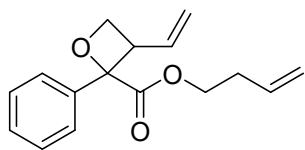

**Compound 3aa major:** <sup>1</sup>H NMR (400 MHz, CDCl<sub>3</sub>) δ 7.42 – 7.30 (m, 8H), 5.92 (ddt, *J* = 9.1, 6.3, 1.7 Hz, 2H), 5.75 (ddtd, *J* = 17.1, 10.3, 6.8, 1.5 Hz, 2H), 5.54 (ddt, *J* = 6.4, 4.0, 1.9 Hz, 2H), 5.44 (tddt, *J* = 8.1, 4.8, 3.5, 1.8 Hz, 2H), 5.11 – 5.00 (m, 2H), 4.69 (dq, *J* = 6.2, 1.9 Hz, 3H), 4.26 – 4.16 (m, 3H), 3.66 (d, *J* = 9.3 Hz, 2H), 2.39 (dtq, *J* = 8.6, 6.7, 1.6 Hz, 3H). <sup>13</sup>C NMR (101 MHz, CDCl<sub>3</sub>) δ 172.06, 135.13, 133.87, 128.70, 128.58, 128.18, 127.74, 127.47, 117.28, 87.76, 75.70, 64.01, 58.44, 33.02. **Compound 3aa minor:** <sup>1</sup>H NMR (400 MHz, CDCl<sub>3</sub>) δ 7.42 – 7.30 (m, 5H), 5.96 (dt, *J* = 5.3, 1.8 Hz, 1H), 5.92 (ddt, *J* = 9.1, 6.3, 1.7 Hz, 1H), 5.75 (ddtd, *J* = 17.1, 10.3, 6.8, 1.5 Hz, 1H), 5.44 (tddt, *J* = 8.1, 4.8, 3.5, 1.8 Hz, 1H), 5.11 – 5.00 (m, 2H), 4.61 (dt, *J* = 4.9, 2.0 Hz, 2H), 4.26 – 4.16 (m, 2H), 3.69 (d, *J* = 7.7 Hz, 1H), 2.39 (dtq, *J* = 8.6, 6.7, 1.6 Hz, 2H). <sup>13</sup>C NMR (101 MHz, CDCl<sub>3</sub>) δ 171.74, 136.02, 133.81, 128.82, 128.50, 128.28, 127.92, 127.53, 117.42, 87.31, 75.64, 63.93, 57.42, 33.06. **HRMS (ESI)** m/z: [M + H]<sup>+</sup> Calcd for C<sub>16</sub>H<sub>18</sub>O<sub>3</sub>: 259.1329; Found: 259.1328.

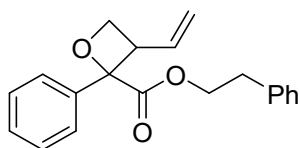

**Compound 3bb major:** <sup>1</sup>H NMR (400 MHz, CDCl<sub>3</sub>) δ 7.38 – 7.31 (m, 8H), 7.29 – 7.23 (m, 8H), 5.92 (dd, *J* = 6.3, 1.8 Hz, 2H), 5.55 – 5.50 (m, 2H), 5.48 – 5.37 (m, 2H), 4.68 (dt, *J* = 4.1, 2.0 Hz, 3H), 4.37 (dt, *J* = 8.8, 6.9 Hz, 3H), 3.66 (t, *J* = 8.4 Hz, 2H), 2.95 (td, *J* = 7.0, 2.0 Hz, 3H). <sup>13</sup>C NMR (101 MHz, CDCl<sub>3</sub>) δ 172.02, 137.81, 135.10, 129.01, 128.76, 128.55, 128.49, 128.21, 127.76, 127.48, 126.51, 87.75, 75.70, 65.49, 58.48, 35.03. **Compound 3bb minor:** <sup>1</sup>H NMR (400 MHz, CDCl<sub>3</sub>) δ 7.38 – 7.31 (m, 5H), 7.18 – 7.13 (m, 5H), 5.92 (dd, *J* = 6.3, 1.8 Hz, 1H), 5.80 (dq, *J* = 6.3, 2.2 Hz, 1H), 5.48 – 5.37 (m, 1H), 4.61 – 4.57 (m, 2H), 4.37 (dt, *J* = 8.8, 6.9 Hz, 2H), 3.66 (t, *J* = 8.4 Hz, 1H), 2.95 (td, *J* = 7.0, 2.0 Hz, 2H). <sup>13</sup>C NMR (101 MHz, CDCl<sub>3</sub>) δ 171.70, 137.70, 136.01, 128.99, 128.86, 128.59, 128.49, 128.25, 127.92, 127.54, 126.60, 87.28, 75.63, 65.37, 57.46, 35.06. **HRMS (ESI)** m/z: [M + H]<sup>+</sup> Calcd for C<sub>20</sub>H<sub>20</sub>O<sub>3</sub>: 309.1485; Found: 309.1481.

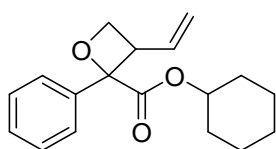

**Compound 3cc major:** <sup>1</sup>H NMR (400 MHz, CDCl<sub>3</sub>) δ 7.43 – 7.30 (m, 8H), 5.91 (dq, *J* = 5.7, 1.8 Hz, 2H), 5.43 (m, 2H), 4.67 (dq, *J* = 3.7, 1.9 Hz, 3H), 3.66 (dd, *J* = 8.5, 6.9 Hz, 2H), 1.58 – 1.20 (m, 17H). <sup>13</sup>C NMR (101 MHz, CDCl<sub>3</sub>) δ 171.49, 135.47, 128.58, 128.45,

128.07, 127.57, 127.40, 87.78, 75.64, 73.07, 58.63, 31.54, 31.30, 25.43, 23.70, 23.57. **Compound 3cc minor:**  $^1\text{H NMR}$  (400 MHz,  $\text{CDCl}_3$ )  $\delta$  7.43 – 7.30 (m, 5H), 5.97 (dt,  $J = 5.5, 1.8$  Hz, 1H), 5.91 (dq,  $J = 5.7, 1.8$  Hz, 1H), 5.43 (m, 1H), 4.61 (dd,  $J = 4.8, 2.2$  Hz, 2H), 3.66 (dd,  $J = 8.5, 6.9$  Hz, 1H), 1.96 – 1.70 (m, 11H).  $^{13}\text{C NMR}$  (101 MHz,  $\text{CDCl}_3$ )  $\delta$  171.18, 136.37, 128.73, 128.20, 128.02, 127.62, 126.82, 87.46, 75.58, 73.14, 57.77, 31.54, 31.30, 25.38, 23.65, 23.57. **HRMS (ESI)**  $m/z$ :  $[\text{M} + \text{H}]^+$  Calcd for  $\text{C}_{18}\text{H}_{22}\text{O}_3$ : 287.1641; Found: 287.1640.

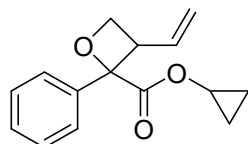

**Compound 3dd major:**  $^1\text{H NMR}$  (400 MHz,  $\text{CDCl}_3$ )  $\delta$  7.45 – 7.31 (m, 10H), 5.93 (dq,  $J = 6.4, 1.7$  Hz, 2H), 5.55 (dt,  $J = 6.3, 2.0$  Hz, 2H), 5.45 (m, 2H), 4.69 (m, 4H), 4.07 – 3.92 (m, 6H), 3.71 (dd,  $J = 10.6, 8.4$  Hz, 2H), 1.14 (m, 2H), 0.56 (m, 4H), 0.31 – 0.25 (m, 4H).  $^{13}\text{C NMR}$  (101 MHz,  $\text{CDCl}_3$ )  $\delta$  172.24, 135.27, 128.67, 128.60, 128.14, 128.09, 127.69, 127.51, 87.82, 75.70, 69.72, 58.42, 9.72, 3.24. **Compound 3dd minor:**  $^1\text{H NMR}$  (400 MHz,  $\text{CDCl}_3$ )  $\delta$  7.45 – 7.31 (m, 15H), 6.01 – 5.96 (m, 1H), 5.93 (dq,  $J = 6.4, 1.7$  Hz, 1H), 5.45 (m, 1H), 4.61 (dt,  $J = 4.9, 2.0$  Hz, 2H), 4.07 – 3.92 (m, 2H), 3.71 (dd,  $J = 10.6, 8.4$  Hz, 1H), 1.14 (m, 1H), 0.56 (m, 2H), 0.31 – 0.25 (m, 2H).  $^{13}\text{C NMR}$  (101 MHz,  $\text{CDCl}_3$ )  $\delta$  171.91, 136.14, 128.83, 128.48, 128.28, 127.93, 127.49, 87.46, 75.64, 69.60, 57.48, 9.83, 3.29. **HRMS (ESI)**  $m/z$ :  $[\text{M} + \text{H}]^+$  Calcd for  $\text{C}_{16}\text{H}_{18}\text{O}_3$ : 259.1329; Found: 259.1327.

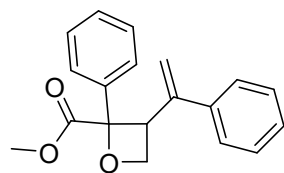

**Compound 3ee major:**  $^1\text{H NMR}$  (400 MHz,  $\text{CDCl}_3$ )  $\delta$  7.45 – 7.34 (m, 12H), 5.87 (q,  $J = 2.1$  Hz, 1H), 5.70 – 5.55 (m, 1H), 5.15 – 5.01 (m, 2H), 3.79 (s, 1H), 3.78 (s, 3H).  $^{13}\text{C NMR}$  (101 MHz,  $\text{CDCl}_3$ )  $\delta$  172.56, 140.28, 135.08, 132.14, 128.70, 128.68, 128.55, 127.92, 127.68, 125.97, 121.25, 89.03, 75.55, 58.38, 52.30. **Compound 3ee minor:**  $^1\text{H NMR}$  (400 MHz,  $\text{CDCl}_3$ )  $\delta$  7.45 – 7.34 (m, 10H), 6.27 (t,  $J = 2.1$  Hz, 1H), 5.70 – 5.55 (m, 1H), 4.98 (p,  $J = 2.4$  Hz, 2H), 3.77 (s, 1H), 3.75 (s, 2H).  $^{13}\text{C NMR}$  (101 MHz,  $\text{CDCl}_3$ )  $\delta$  172.34, 140.37, 135.96, 132.09, 128.89, 128.68, 128.43, 128.01, 127.48, 125.94, 121.90, 88.54, 75.41, 57.43, 52.19. **HRMS (ESI)**  $m/z$ :  $[\text{M} + \text{Na}]^+$  Calcd for  $\text{C}_{19}\text{H}_{18}\text{O}_3$ : 317.1148; Found: 317.1146.



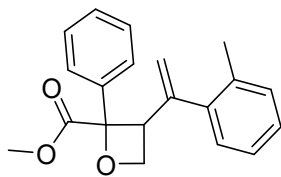

**Compound 3ff major:**  $^1\text{H NMR}$  (400 MHz,  $\text{CDCl}_3$ )  $\delta$  7.38 (M, 6H), 7.23 – 7.15 (m, 4H), 7.07 (dd,  $J = 13.6, 7.1$  Hz, 1H), 5.70 – 5.62 (m, 1H), 5.60 (d,  $J = 2.0$  Hz, 1H), 4.99 – 4.92 (m, 1H), 3.85 (dd,  $J = 7.8, 5.9$  Hz, 1H), 3.78 (s, 4H), 2.29 (s, 4H).  $^{13}\text{C NMR}$  (101 MHz,  $\text{CDCl}_3$ )  $\delta$  172.56, 140.55, 136.06, 135.06, 132.51, 130.91, 128.81, 128.60, 127.91, 127.87, 125.88, 125.01, 89.18, 58.41, 52.29, 21.35. **Compound 3ff minor:**  $^1\text{H NMR}$  (400 MHz,  $\text{CDCl}_3$ )  $\delta$  7.38 (M, 5H), 7.23 – 7.15 (m, 3H), 7.07 (dd,  $J = 13.6, 7.1$  Hz, 1H), 5.88 (q,  $J = 2.1$  Hz, 1H), 5.70 – 5.62 (m, 1H), 4.99 – 4.92 (m, 1H), 3.85 (dd,  $J = 7.8, 5.9$  Hz, 1H), 3.76 (s, 3H), 2.27 (s, 3H).  $^{13}\text{C NMR}$  (101 MHz,  $\text{CDCl}_3$ )  $\delta$  172.29, 140.71, 136.16, 135.74, 132.58, 130.84, 129.11, 128.55, 127.99, 127.64, 125.84, 125.34, 88.71, 57.28, 52.22, 21.12. **HRMS (ESI)**  $m/z$ :  $[\text{M} + \text{H}]^+$  Calcd for  $\text{C}_{20}\text{H}_{20}\text{O}_3$ : 309.1485; Found: 309.1484.

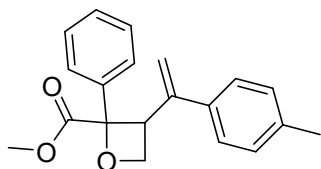

**Compound 3gg major:**  $^1\text{H NMR}$  (400 MHz,  $\text{CDCl}_3$ )  $\delta$  7.42 – 7.36 (m, 10H), 7.19 – 7.15 (m, 9H), 6.20 (d,  $J = 2.1$  Hz, 1H), 5.80 (d,  $J = 2.1$  Hz, 2H), 5.62 (dq,  $J = 12.8, 4.1$  Hz, 2H), 5.10 – 4.99 (m, 3H), 4.94 (d,  $J = 2.1$  Hz, 1H), 3.77 (s, 3H), 3.74 (d,  $J = 5.8$  Hz, 3H), 3.70 (d,  $J = 8.4$  Hz, 0H), 2.38 (s, 4H), 2.37 (s, 5H).  $^{13}\text{C NMR}$  (101 MHz,  $\text{CDCl}_3$ )  $\delta$  172.60, 140.13, 135.14, 129.34, 128.70, 128.56, 127.88, 125.84, 120.22, 89.03, 75.60, 58.44, 52.29, 21.34. **Compound 3gg minor:**  $^1\text{H NMR}$  (400 MHz,  $\text{CDCl}_3$ )  $\delta$  7.42 – 7.36 (m, 10H), 7.19 – 7.15 (m, 9H), 6.20 (d,  $J = 2.1$  Hz, 1H), 5.80 (d,  $J = 2.1$  Hz, 2H), 5.62 (dq,  $J = 12.8, 4.1$  Hz, 2H), 5.10 – 4.99 (m, 3H), 4.94 (d,  $J = 2.1$  Hz, 1H), 3.77 (s, 3H), 3.74 (d,  $J = 5.8$  Hz, 3H), 3.70 (d,  $J = 8.4$  Hz, 0H), 2.38 (s, 4H), 2.37 (s, 5H).  $^{13}\text{C NMR}$  (101 MHz,  $\text{CDCl}_3$ )  $\delta$  172.38, 140.24, 138.40, 128.86, 128.65, 128.02, 127.65, 125.87, 120.89, 88.52, 75.46, 57.51, 52.17, 21.34. **HRMS (ESI)**  $m/z$ :  $[\text{M} + \text{H}]^+$  Calcd for  $\text{C}_{20}\text{H}_{20}\text{O}_3$ : 309.1485; Found: 309.1484.

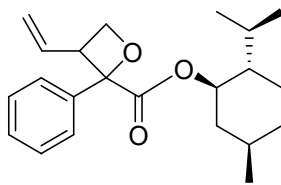

**Compound 3hh major:**  $^1\text{H NMR}$  (400 MHz,  $\text{CDCl}_3$ )  $\delta$  7.42 – 7.32 (m, 8H), 6.01 – 5.93 (m, 2H), 5.92 – 5.88 (m, 2H), 5.49 – 5.37 (m, 2H), 4.72 (ddd,  $J = 21.2, 10.5, 5.6$  Hz, 1H), 4.61 (dt,  $J = 4.2, 2.0$  Hz, 4H), 3.64 (dd,  $J = 8.8, 1.8$  Hz, 2H), 2.06 – 2.00 (m, 1H), 1.93 – 1.83 (m, 2H), 1.68 – 1.60 (m, 3H), 1.49 (tq,  $J = 9.3, 2.7$  Hz, 3H), 1.34 (ddd,  $J = 14.7, 7.3, 3.2$  Hz, 2H), 1.09 – 0.96 (m, 3H), 0.91 (d,  $J = 7.4$  Hz, 4H), 0.87 – 0.80 (m, 1H), 0.74 (d,  $J = 7.0$  Hz, 4H), 0.58 (d,  $J = 7.0$  Hz, 4H).  $^{13}\text{C NMR}$  (101 MHz,  $\text{CDCl}_3$ )  $\delta$  171.43, 136.35, 128.67, 128.60, 128.56,

128.52, 128.48, 127.98, 127.61, 127.42, 87.25, 75.56, 74.79, 57.76, 47.06, 40.88, 34.26, 31.49, 31.46, 25.75, 23.25, 22.04, 20.82, 16.05. **Compound 3hh minor:**  $^1\text{H NMR}$  (400 MHz,  $\text{CDCl}_3$ )  $\delta$  7.42 – 7.32 (m, 5H), 6.01 – 5.93 (m, 1H), 5.56 (dq,  $J = 6.3, 2.2$  Hz, 1H), 5.49 – 5.37 (m, 1H), 4.72 (ddd,  $J = 21.2, 10.5, 5.6$  Hz, 1H), 4.68 – 4.65 (m, 2H), 3.64 (dd,  $J = 8.8, 1.8$  Hz, 1H), 2.16 – 2.09 (m, 1H), 1.68 – 1.60 (m, 2H), 1.49 (tq,  $J = 9.3, 2.7$  Hz, 2H), 1.34 (ddd,  $J = 14.7, 7.3, 3.2$  Hz, 1H), 1.09 – 0.96 (m, 2H), 0.88 (d,  $J = 6.5$  Hz, 3H), 0.87 – 0.80 (m, 1H), 0.70 (d,  $J = 7.0$  Hz, 3H), 0.54 (d,  $J = 6.9$  Hz, 3H).  $^{13}\text{C NMR}$  (101 MHz,  $\text{CDCl}_3$ )  $\delta$  171.71, 135.44, 128.43, 128.26, 128.21, 128.14, 128.09, 127.98, 127.56, 127.42, 87.46, 75.63, 74.92, 58.55, 47.21, 40.98, 34.34, 31.41, 26.13, 23.39, 22.09, 20.64, 15.97. **HRMS (ESI)**  $m/z$ :  $[\text{M} + \text{Na}]^+$  Calcd for  $\text{C}_{22}\text{H}_{30}\text{O}_3$ : 365.2087; Found: 365.2084.

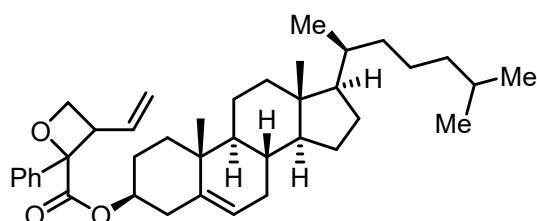

**Compound 3ii major:**  $^1\text{H NMR}$  (400 MHz,  $\text{CDCl}_3$ )  $\delta$  7.45 – 7.30 (m, 9H), 5.91 (dd,  $J = 6.4, 2.1$  Hz, 2H), 5.55 (dp,  $J = 5.7, 1.9$  Hz, 2H), 5.47 – 5.33 (m, 4H), 4.68 (dq,  $J = 4.4, 2.3$  Hz, 4H), 3.68 – 3.60 (m, 2H), 2.46–2.18 (m, 4H), 2.08 – 1.77 (m, 6H), 1.62 – 0.80 (m, 39H).  $^{13}\text{C NMR}$  (101 MHz,  $\text{CDCl}_3$ )  $\delta$  171.55, 139.69, 135.43, 128.69, 128.63, 128.15, 127.68, 127.64, 122.74, 87.88, 75.74, 74.60, 58.63, 56.23, 50.08, 42.42, 39.63, 37.08, 37.01, 36.69, 36.29, 35.92, 31.95, 28.36, 28.14, 27.84, 23.95, 22.96, 22.69, 21.14, 18.83, 11.97. **Compound 3ii minor:**  $^1\text{H NMR}$  (400 MHz,  $\text{CDCl}_3$ )  $\delta$  7.45 – 7.30 (m, 5H), 5.91 (dd,  $J = 6.4, 2.1$  Hz, 1H), 5.55 (dp,  $J = 5.7, 1.9$  Hz, 2H), 5.47 – 5.33 (m, 2H), 4.61 (t,  $J = 3.5$  Hz, 2H), 3.68 – 3.60 (m, 1H), 2.46–2.18 (m, 2H), 2.08 – 1.77 (m, 10H), 1.62 – 0.80 (m, 71H).  $^{13}\text{C NMR}$  (101 MHz,  $\text{CDCl}_3$ )  $\delta$  171.23, 139.78, 136.31, 128.81, 128.54, 128.31, 128.03, 127.50, 122.87, 87.60, 75.67, 74.65, 57.70, 56.79, 50.08, 42.42, 39.83, 38.12, 37.86, 36.69, 36.29, 35.92, 32.01, 24.40, 22.96, 22.69, 21.14, 19.45, 11.97. **HRMS (ESI)**  $m/z$ :  $[\text{M} + \text{H}]^+$  Calcd for  $\text{C}_{39}\text{H}_{56}\text{O}_3$ : 573.4302; Found: 573.4308.

## Reference

1. S. Jana, Z. Yang, C. Pei, et. al. *Chem. Sci.* 2019, 10, 10129–10134.
2. R. A. Croft, M. A. J. Dubois, A. J. Boddy, et. al. *Eur. J. Org. Chem.* 2019, 5385–5395.
3. Frisch, M. J. T., G. W.; Schlegel, H. B.; Scuseria, G. E.; Robb, M. A.; Cheeseman, J. R.; Scalmani, G.; Barone, V.; Petersson, G. A.; Nakatsuji, H.; Li, X.; Caricato, M.; Marenich, A. V.; Bloino, J.; Janesko, B. G.; Gomperts, R.; Mennucci, B.; Hratchian, H. P.; Ortiz, J. V.; Izmaylov, A. F.; Sonnenberg, J. L.; Williams-Young, D.; Ding, F.; Lipparini, F.; Egidi, F.; Goings, J.; Peng, B.; Petrone, A.; Henderson, T.; Ranasinghe, D.; Zakrzewski, V. G.; Gao, J.; Rega, N.; Zheng, G.; Liang, W.; Hada, M.; Ehara, M.; Toyota, K.; Fukuda, R.; Hasegawa, J.; Ishida, M.; Nakajima, T.; Honda, Y.; Kitao, O.; Nakai, H.; Vreven, T.; Throssell, K.; Montgomery, J. A., Jr.; Peralta, J. E.; Ogliaro, F.; Bearpark, M. J.; Heyd, J. J.; Brothers, E. N.; Kudin, K. N.; Staroverov, V. N.; Keith, T. A.; Kobayashi, R.; Normand, J.; Raghavachari, K.; Rendell, A. P.; Burant, J. C.; Iyengar, S. S.; Tomasi, J.; Cossi, M.; Millam, J. M.; Klene, M.; Adamo, C.; Cammi, R.; Ochterski, J. W.; Martin, R. L.; Morokuma, K.; Farkas, O.; Foresman, J. B.; Fox, D. J. , Gaussian, Inc., Wallingford CT, 2016.
4. Becke, A. D., *J. Chem. Phys.* 1993, 98, 5648-5652.
5. Lee, C.; Yang, W.; Parr, R. G., *Phys. Rev. B*, 1988, 37, 785-789.
6. Marenich, A. V.; Cramer, C. J.; Truhlar, D. G., *J. Phys. Chem. B* 2009, 113, 6378-6396.

# <sup>1</sup>H NMR and <sup>13</sup>C NMR Spectra for Products

## 3a: <sup>1</sup>H NMR (400 MHz, CDCl<sub>3</sub>)

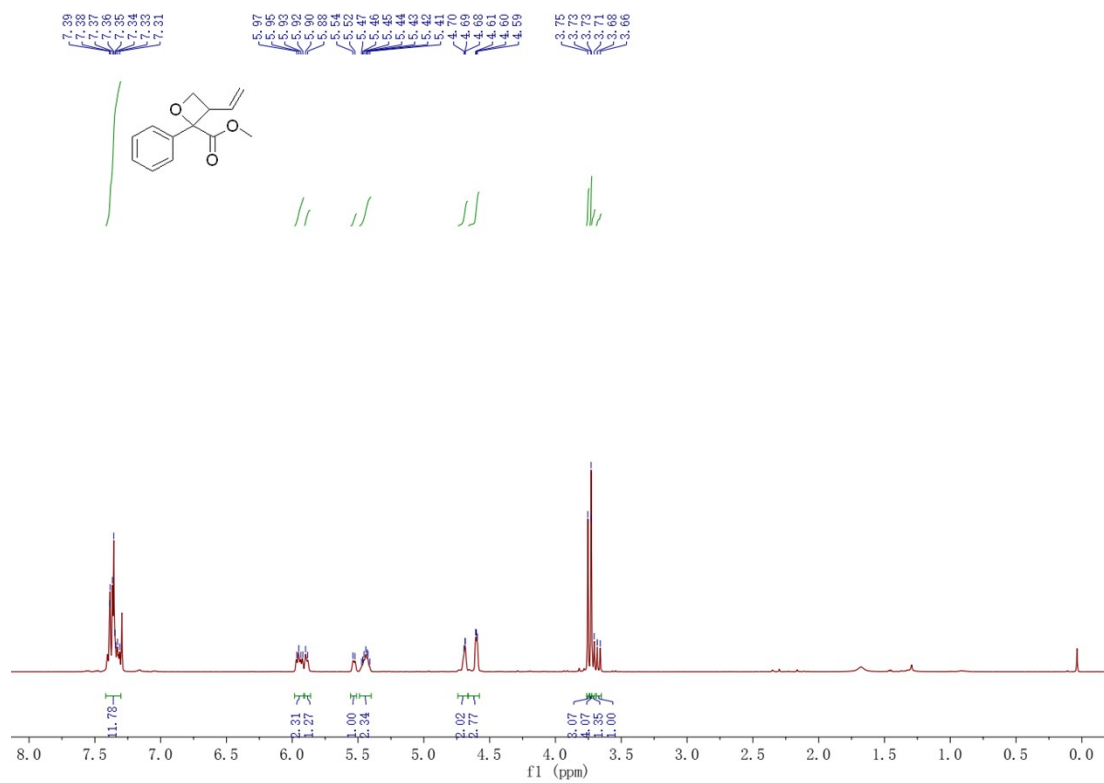

## <sup>13</sup>C NMR (101 MHz, CDCl<sub>3</sub>)

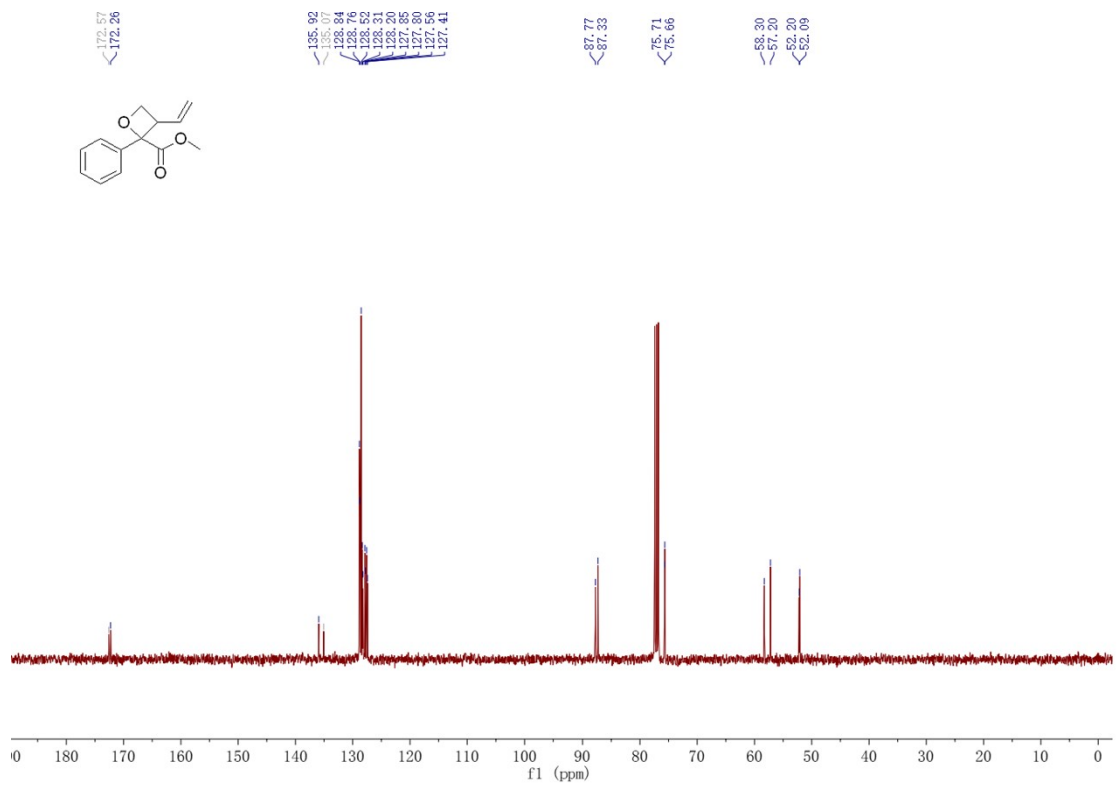

**3b: <sup>1</sup>H NMR (400 MHz, CDCl<sub>3</sub>)**

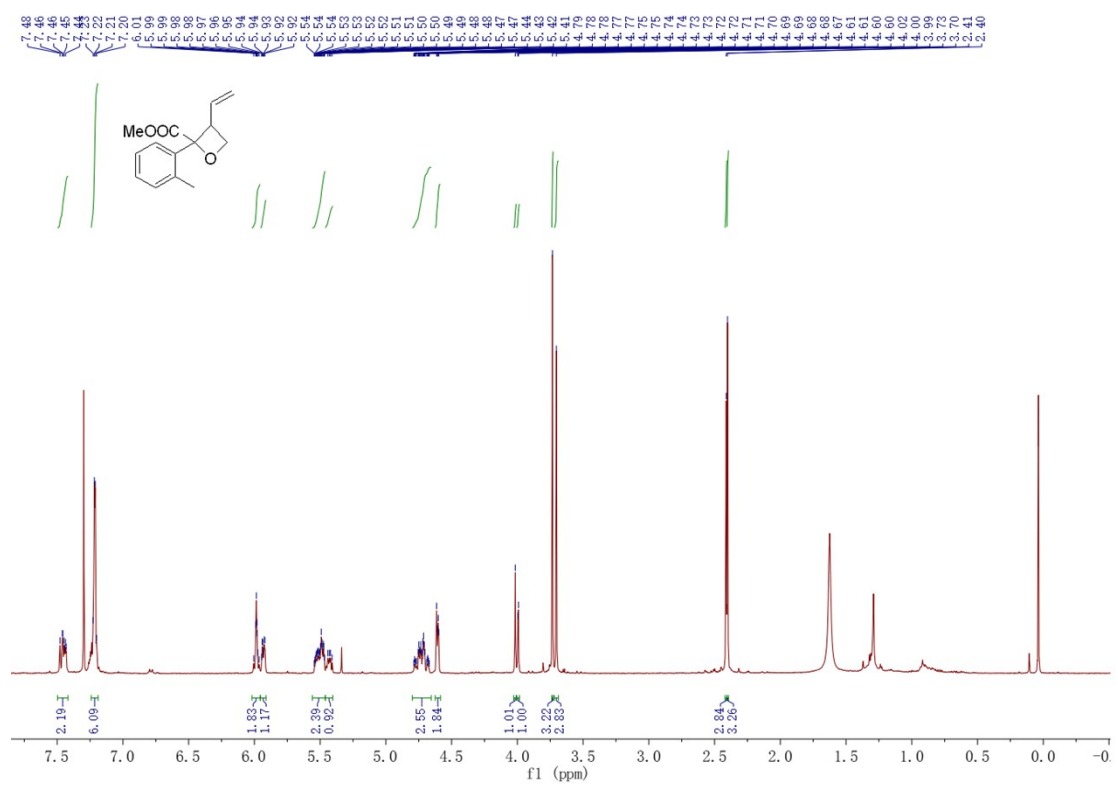

**<sup>13</sup>C NMR (101 MHz, CDCl<sub>3</sub>)**



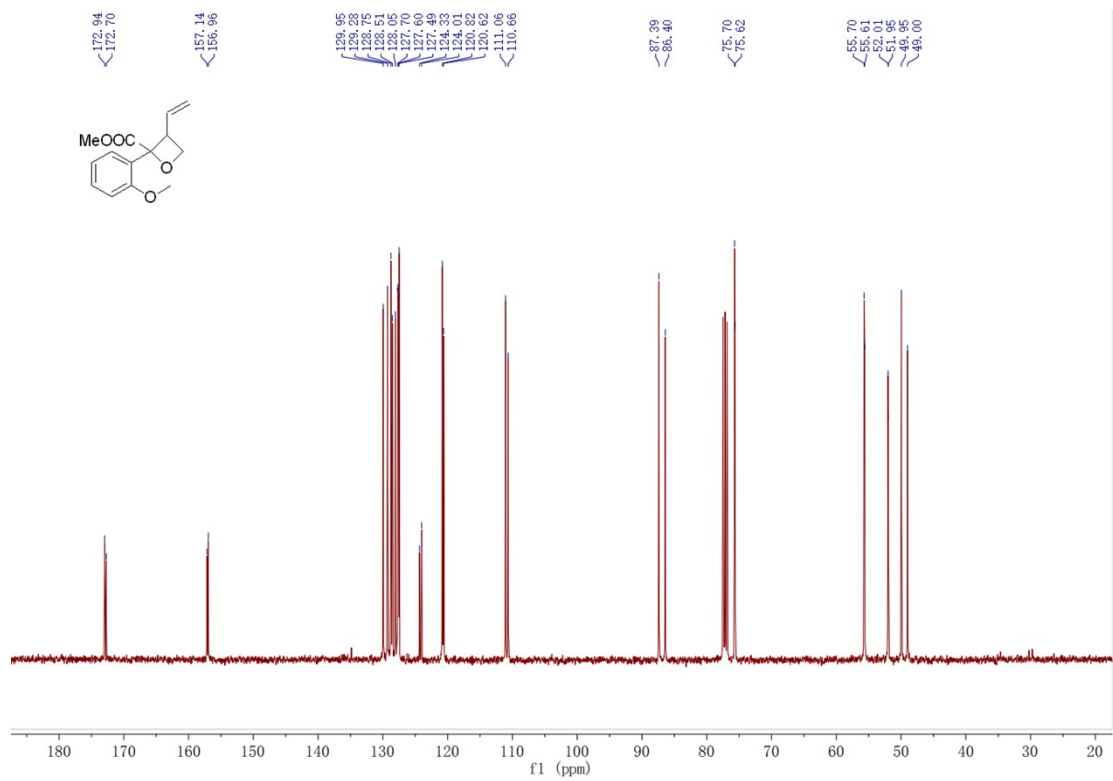

**3d: <sup>1</sup>H NMR (400 MHz, CDCl<sub>3</sub>)**

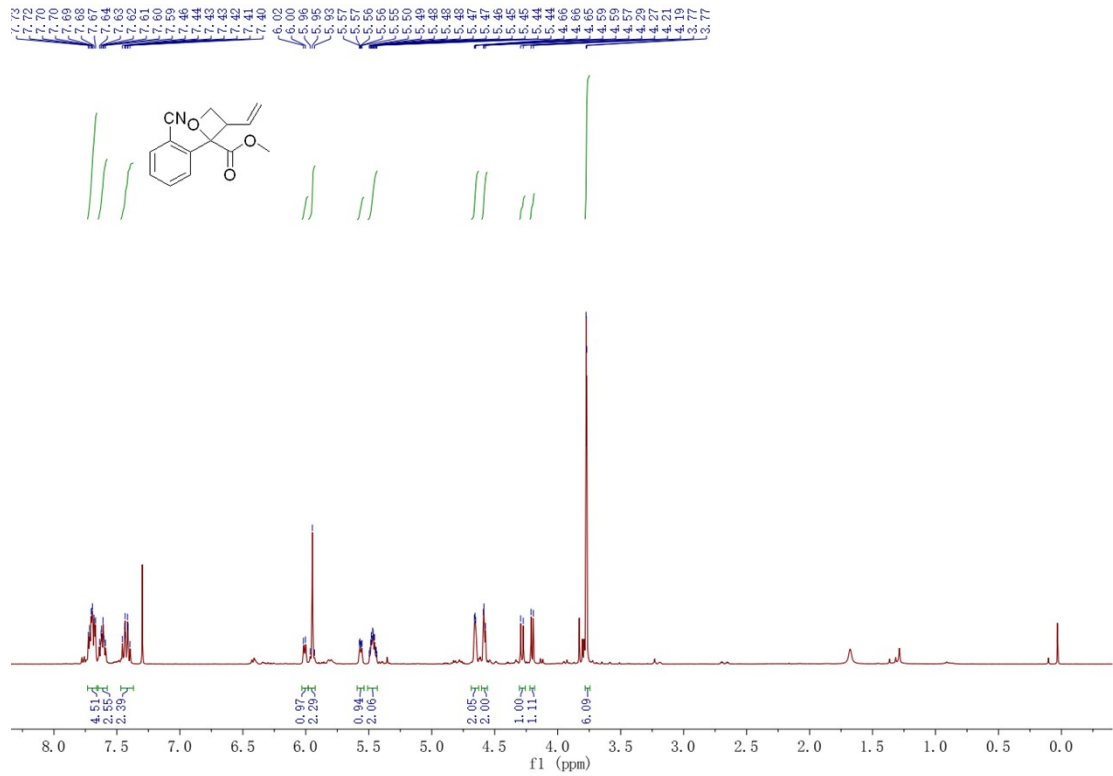

**<sup>13</sup>C NMR (101 MHz, CDCl<sub>3</sub>)**

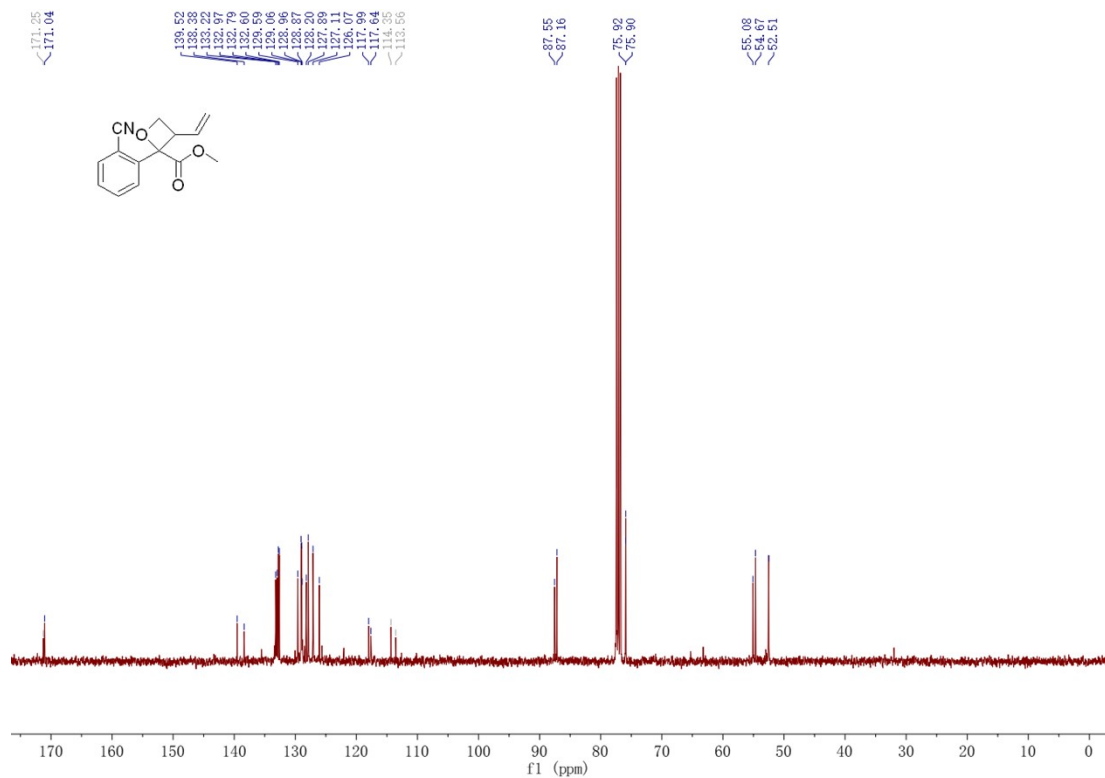

**3e: 1H NMR (400 MHz, CDCl3)**

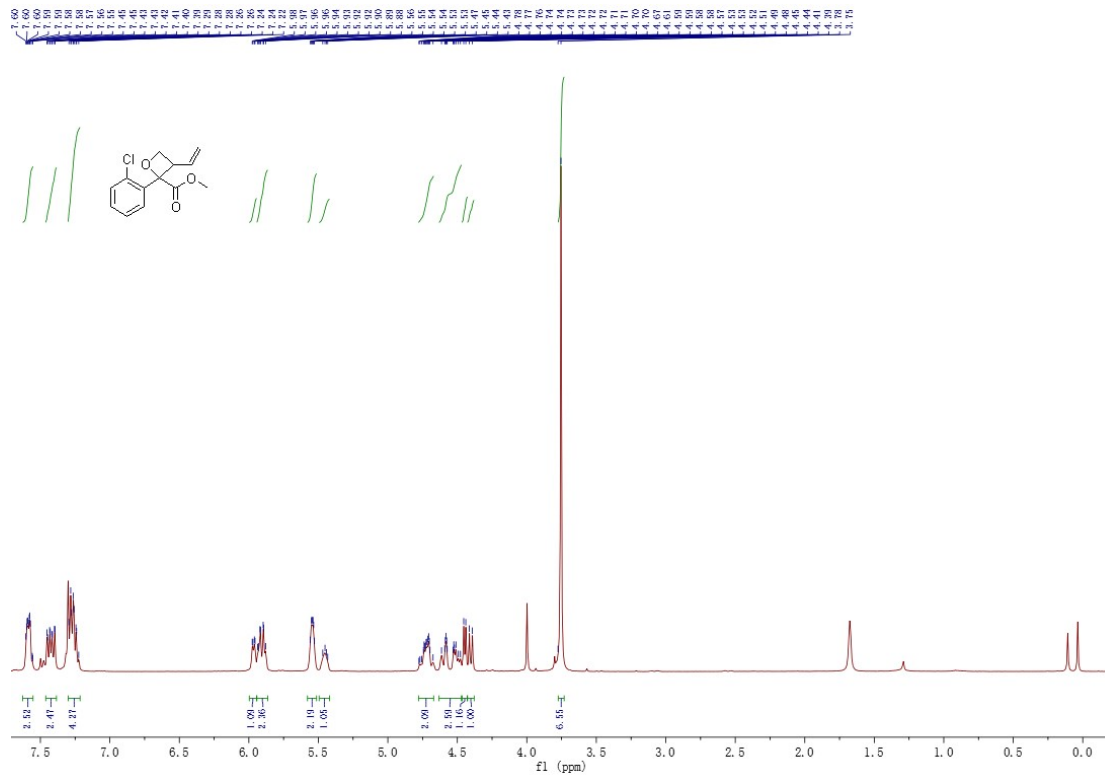

**13C NMR (101 MHz, CDCl3)**



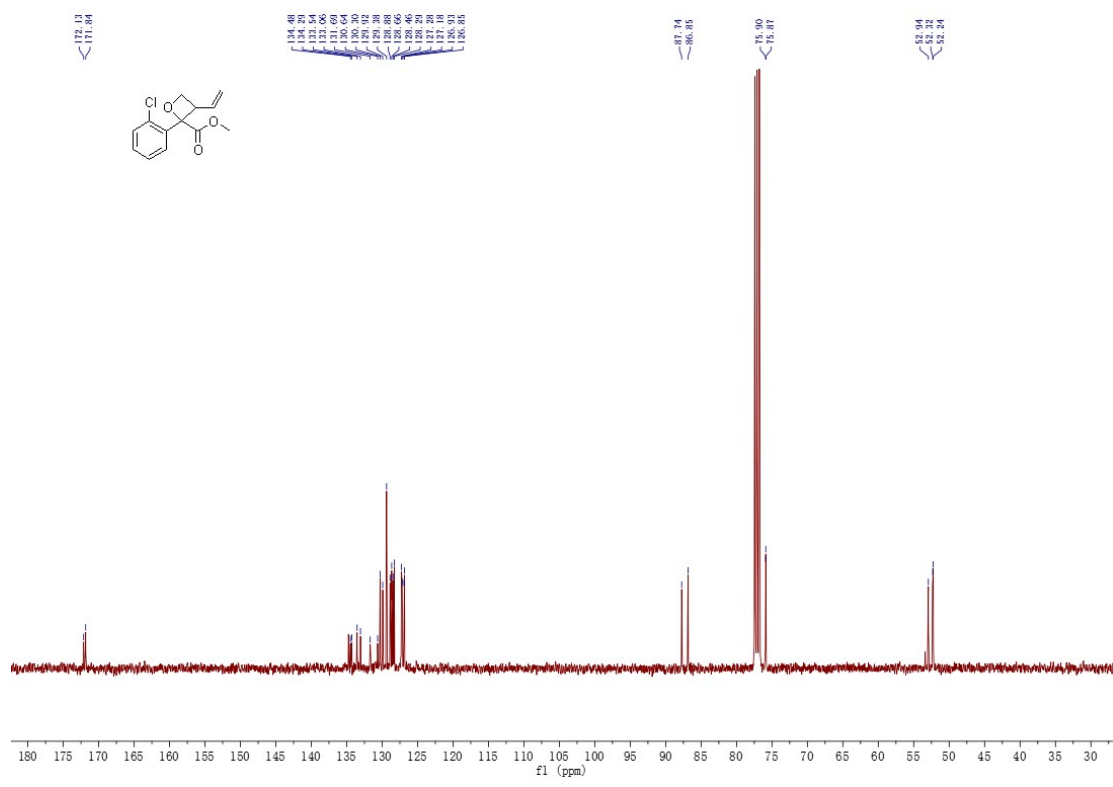

**3f: <sup>1</sup>H NMR (400 MHz, CDCl<sub>3</sub>)**

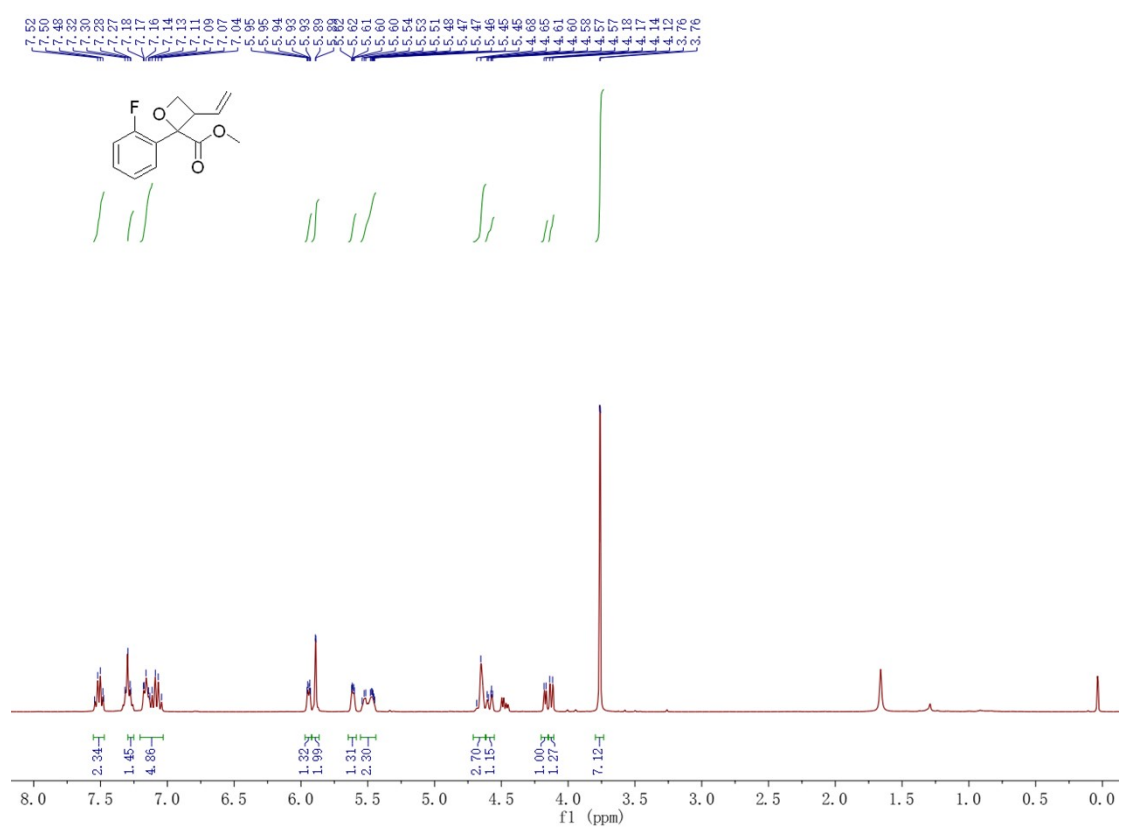

### <sup>13</sup>C NMR (101 MHz, CDCl<sub>3</sub>)

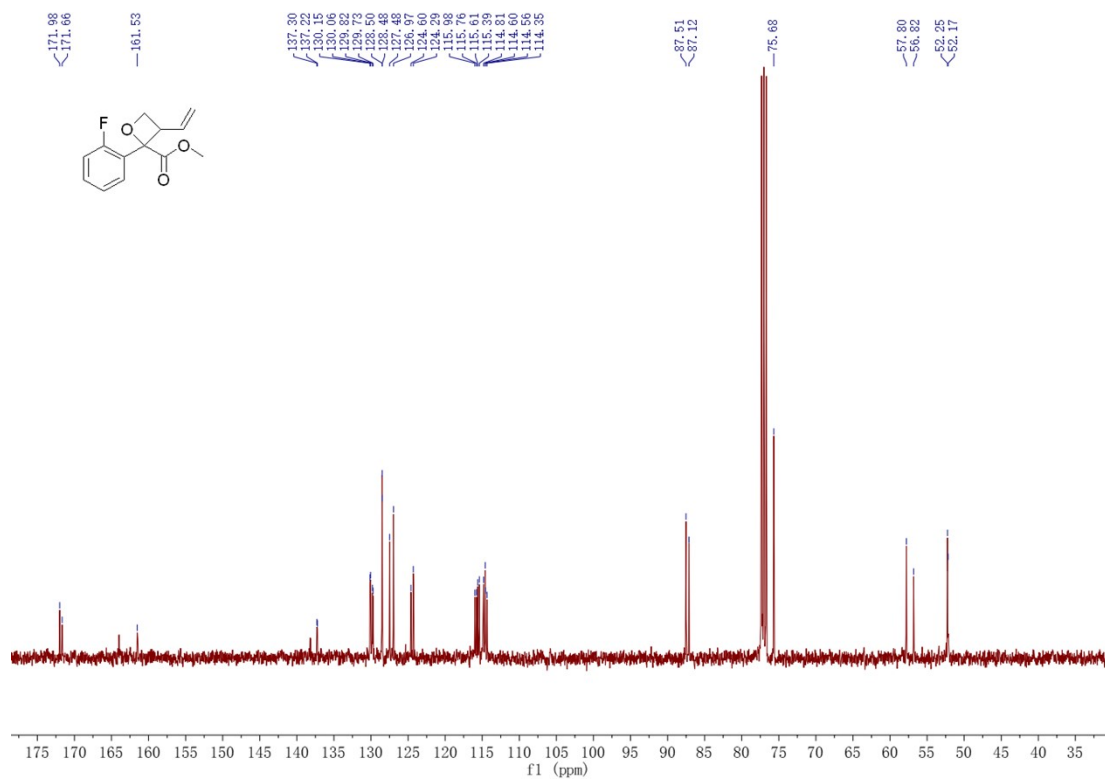

### <sup>19</sup>F NMR (376 MHz, CDCl<sub>3</sub>)

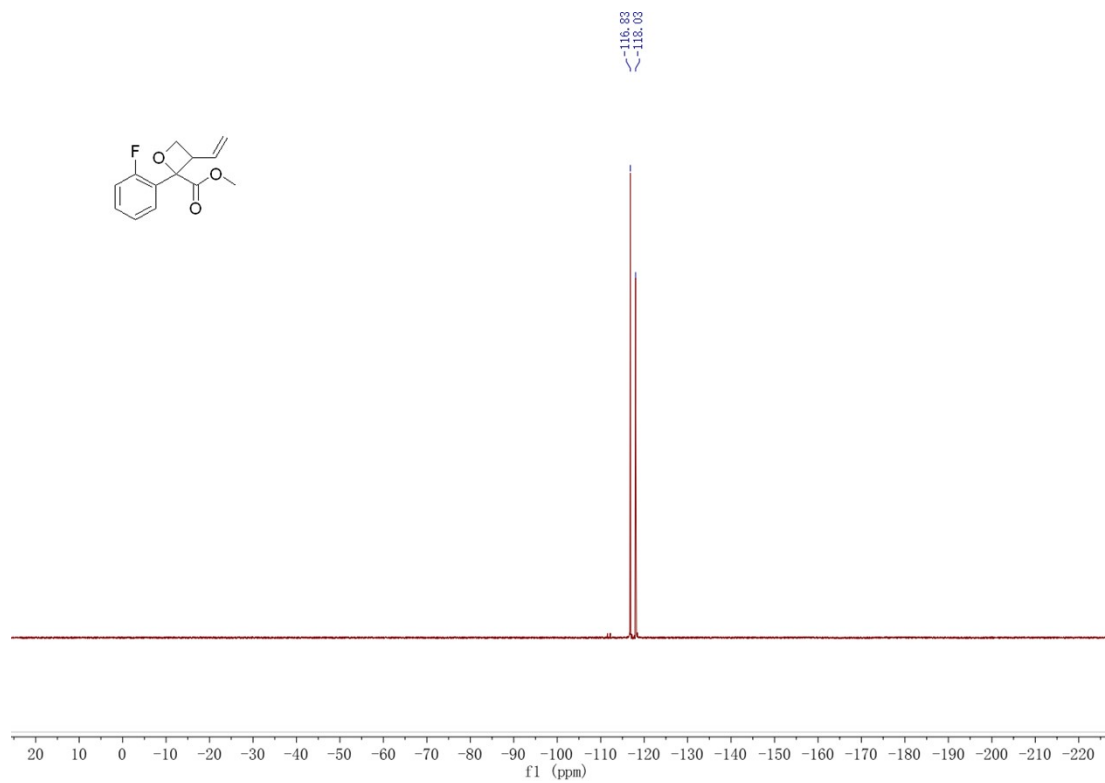

**3g:  $^1\text{H}$  NMR (400 MHz,  $\text{CDCl}_3$ )**

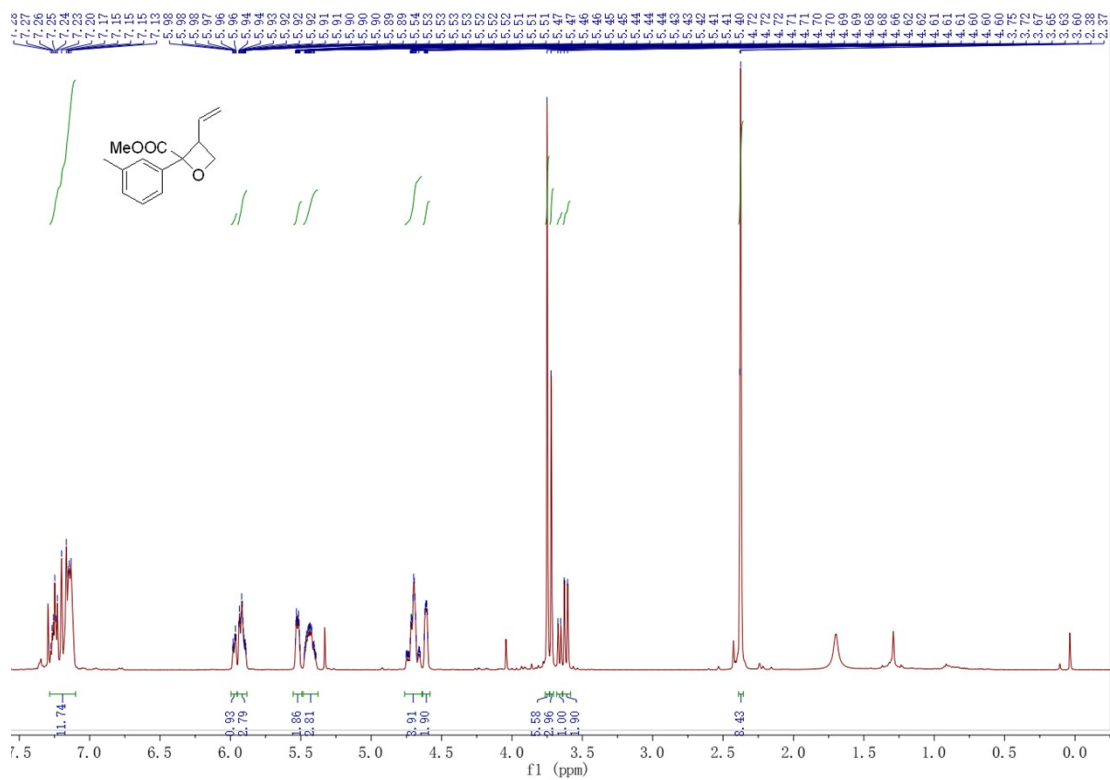

**$^{13}\text{C}$  NMR (101 MHz,  $\text{CDCl}_3$ )**

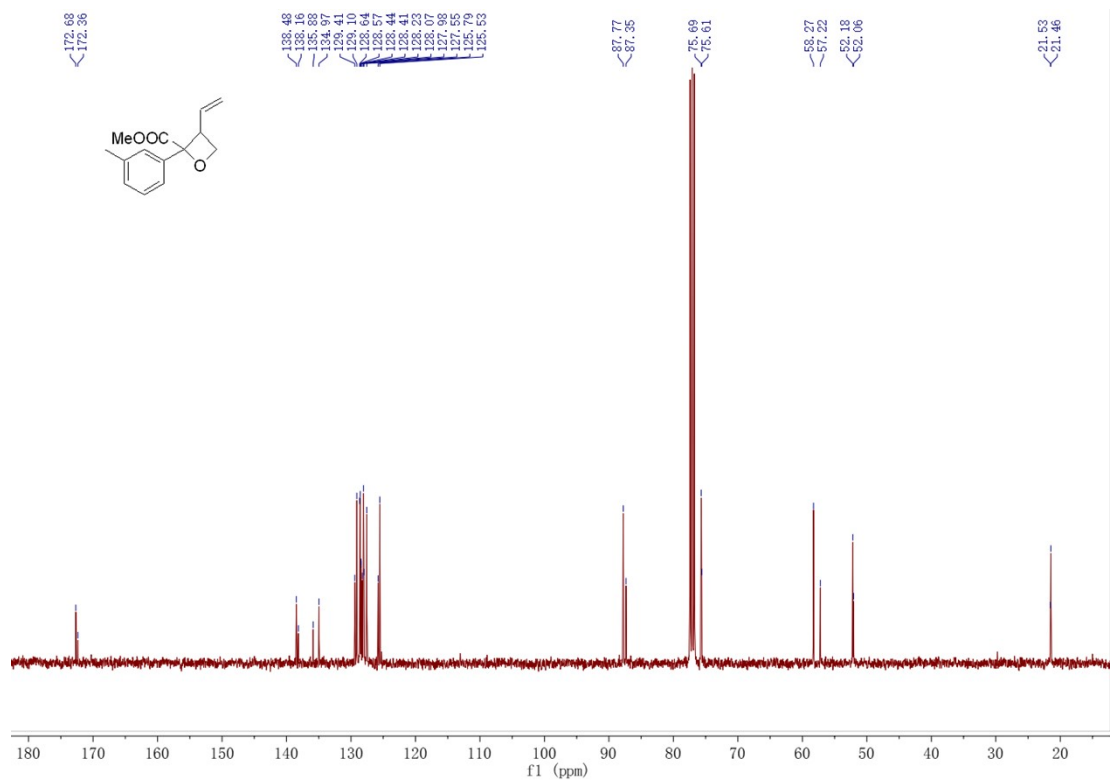

**3h: <sup>1</sup>H NMR (400 MHz, CDCl<sub>3</sub>)**

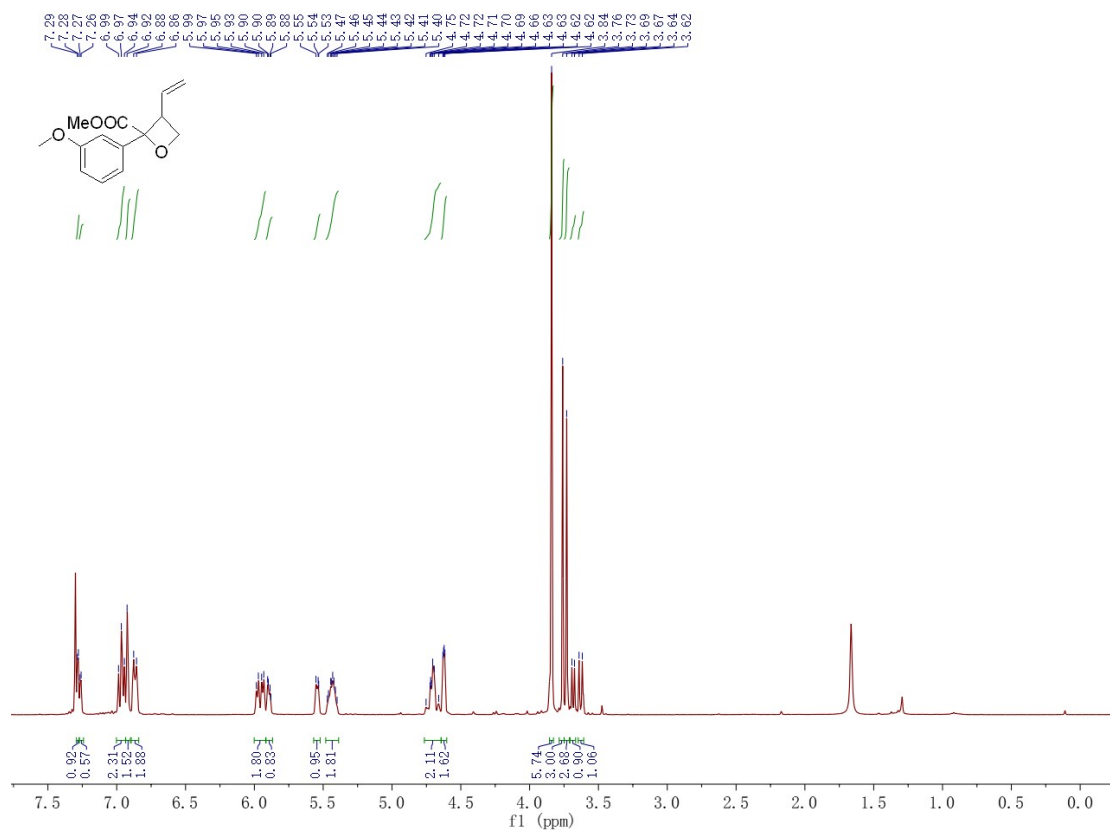

**<sup>13</sup>C NMR (101 MHz, CDCl<sub>3</sub>)**

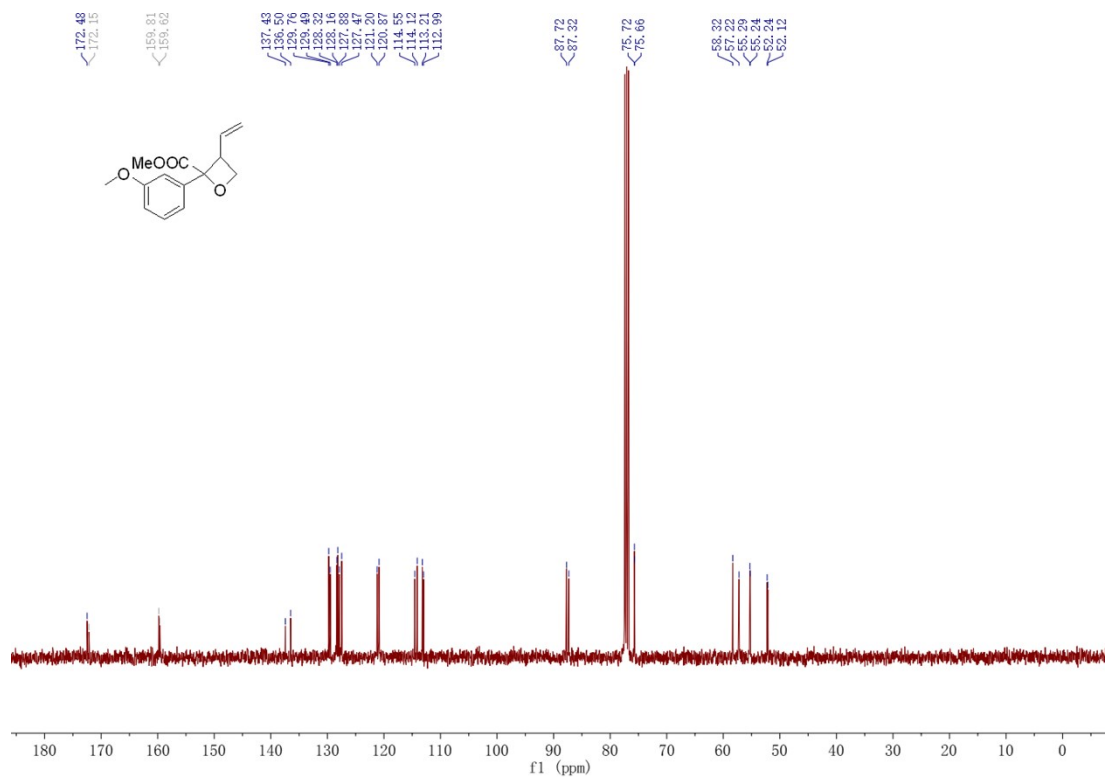

**3i:  $^1\text{H}$  NMR (400 MHz,  $\text{CDCl}_3$ )**

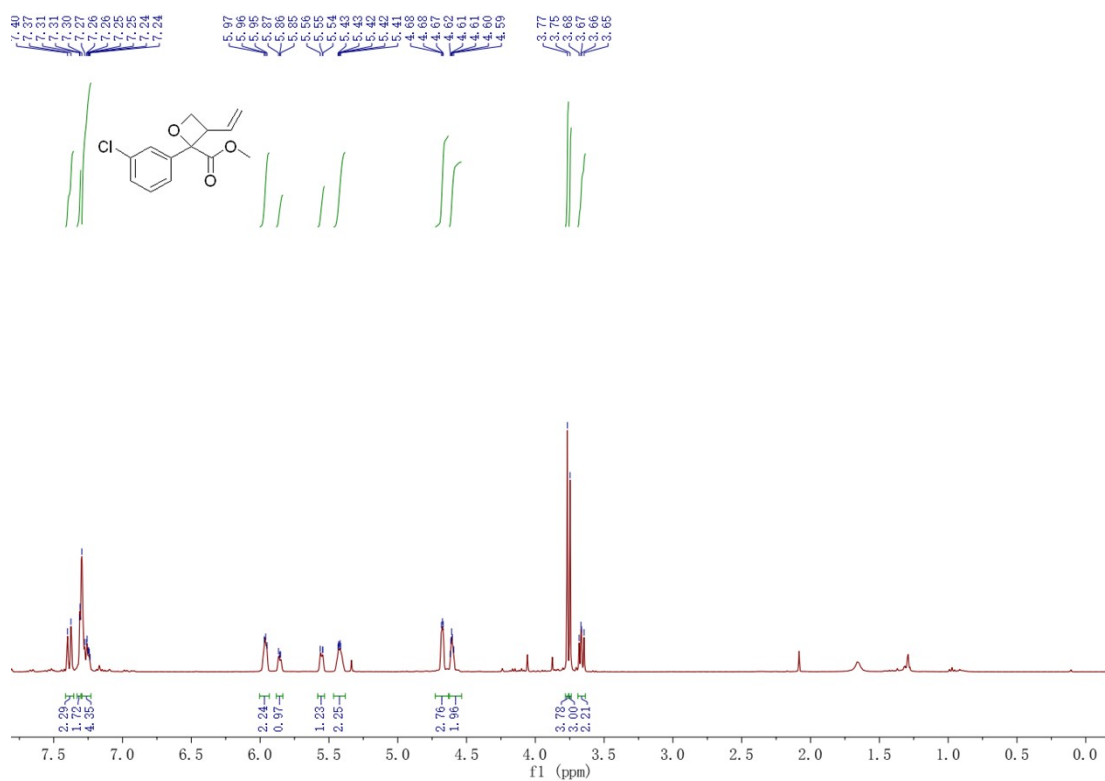

**$^{13}\text{C}$  NMR (101 MHz,  $\text{CDCl}_3$ )**

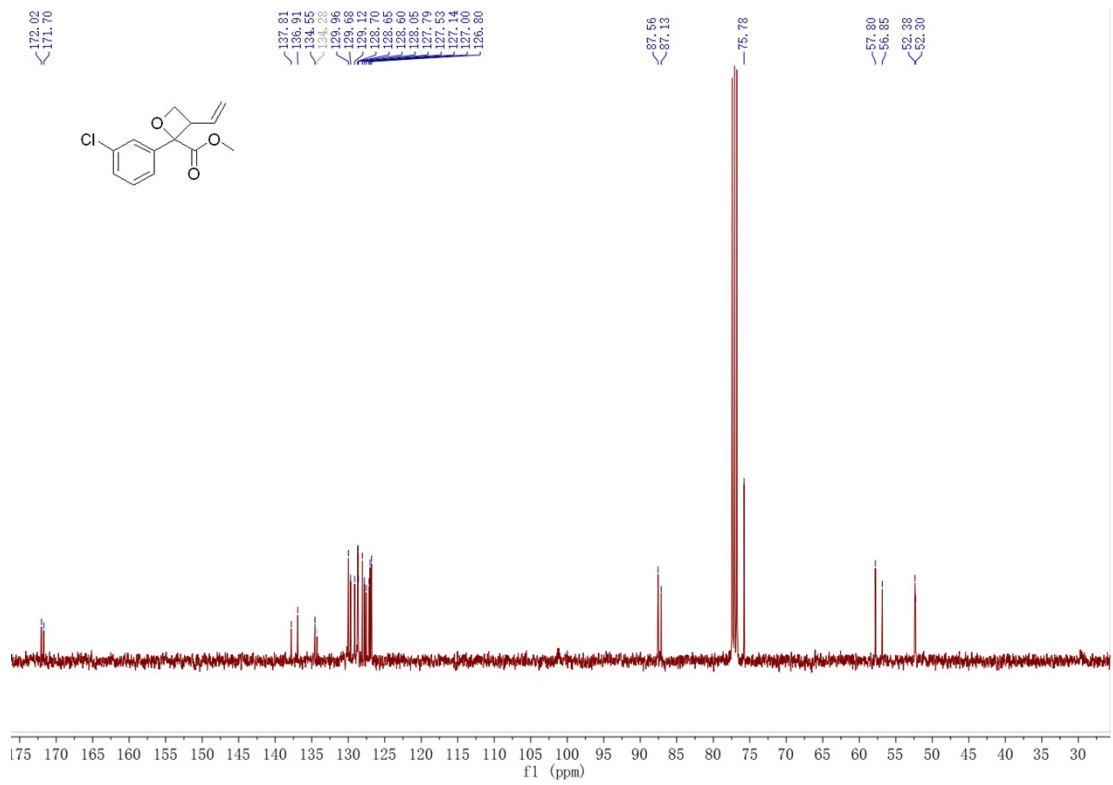

**3j: <sup>1</sup>H NMR (400 MHz, CDCl<sub>3</sub>)**

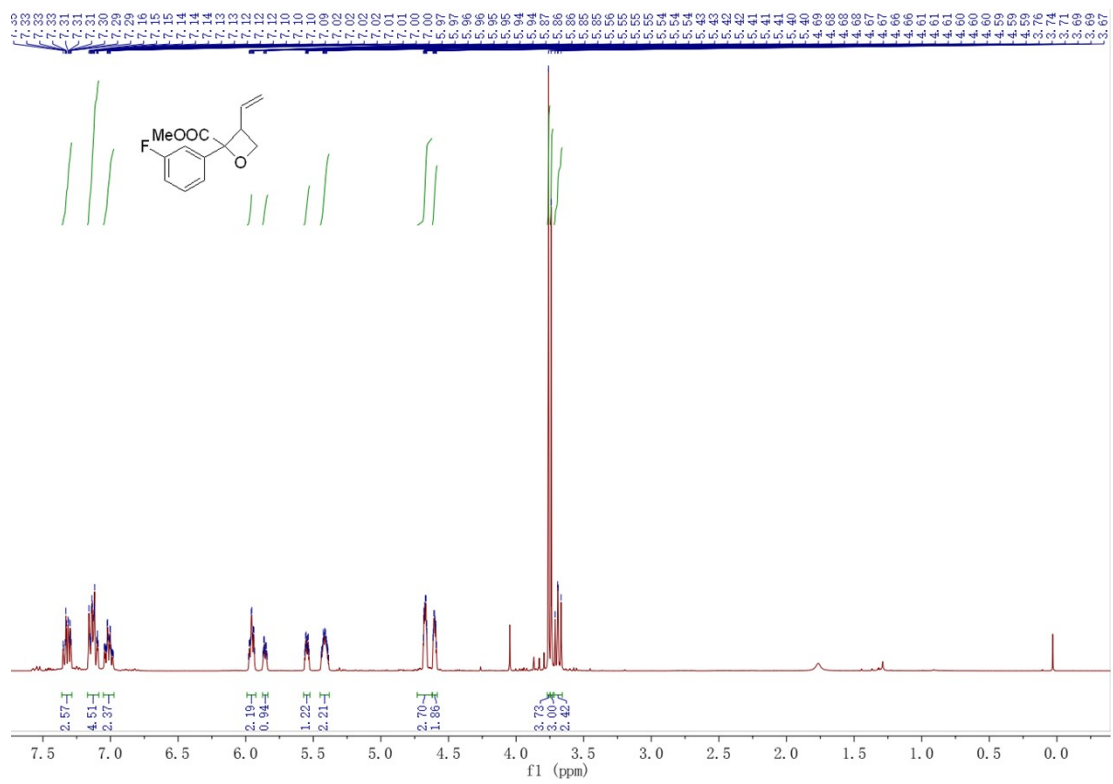

**<sup>13</sup>C NMR (101 MHz, CDCl<sub>3</sub>)**

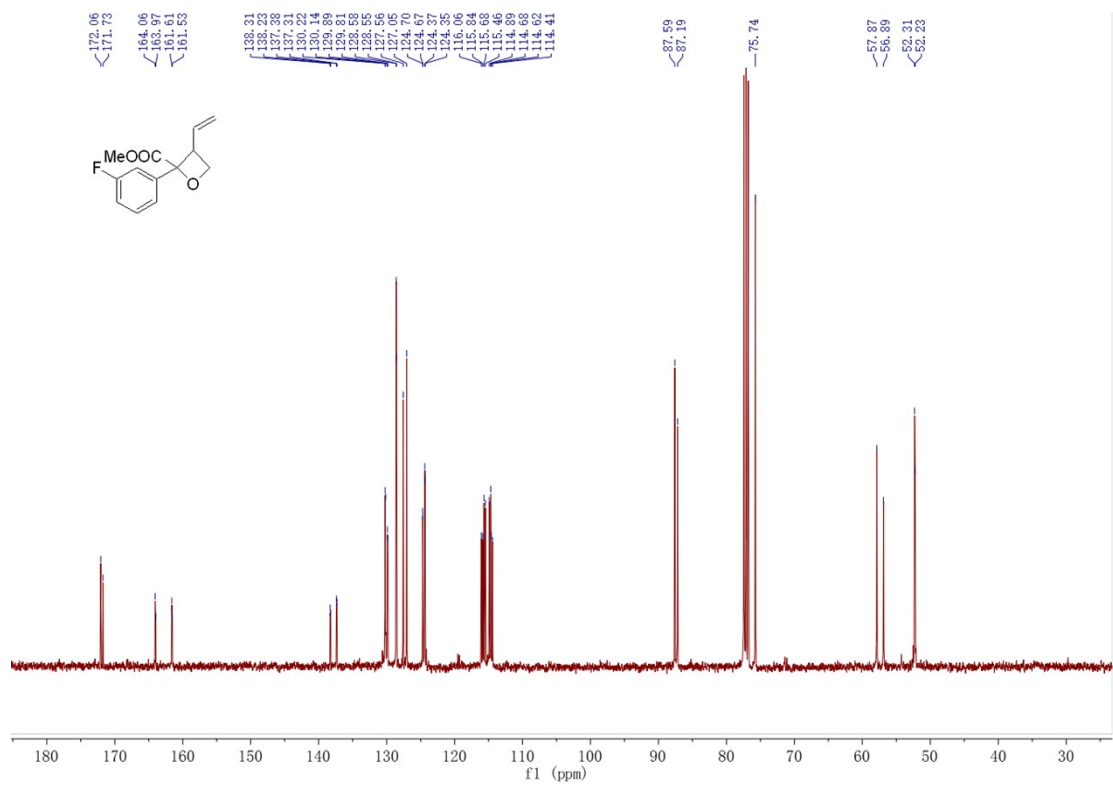

**3k: <sup>19</sup>F NMR (376 MHz, CDCl<sub>3</sub>)**

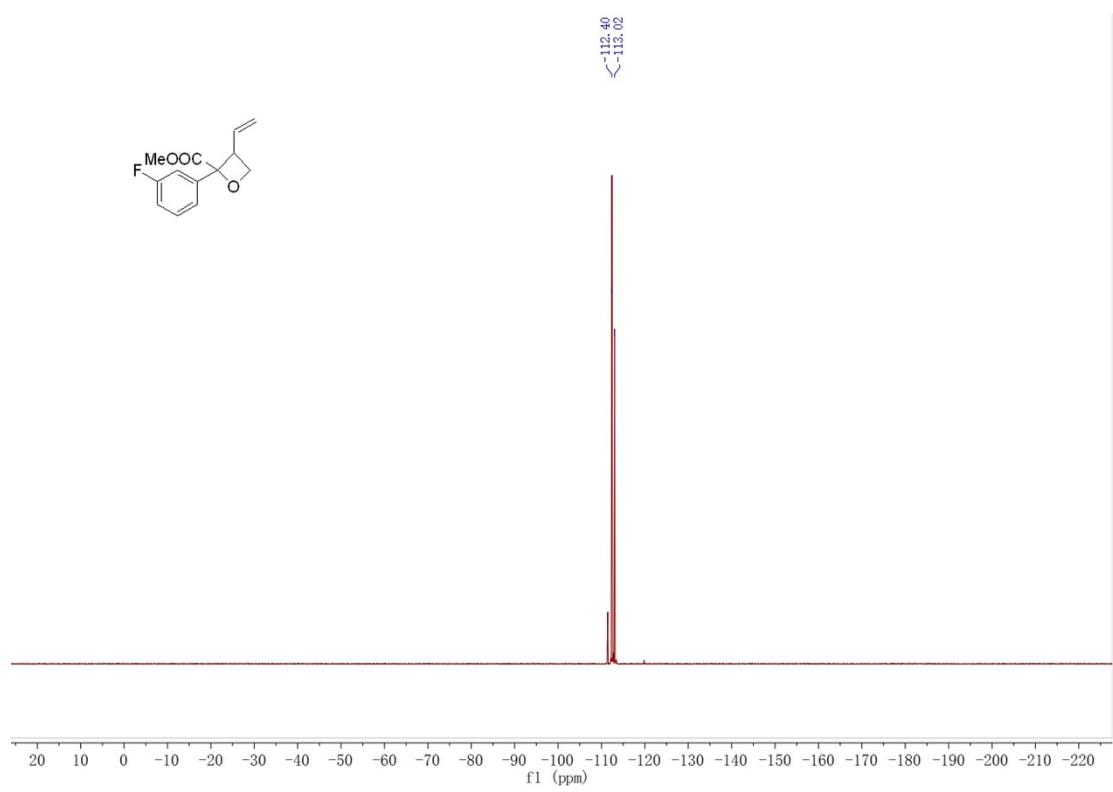

**3k: <sup>1</sup>H NMR (400 MHz, CDCl<sub>3</sub>)**

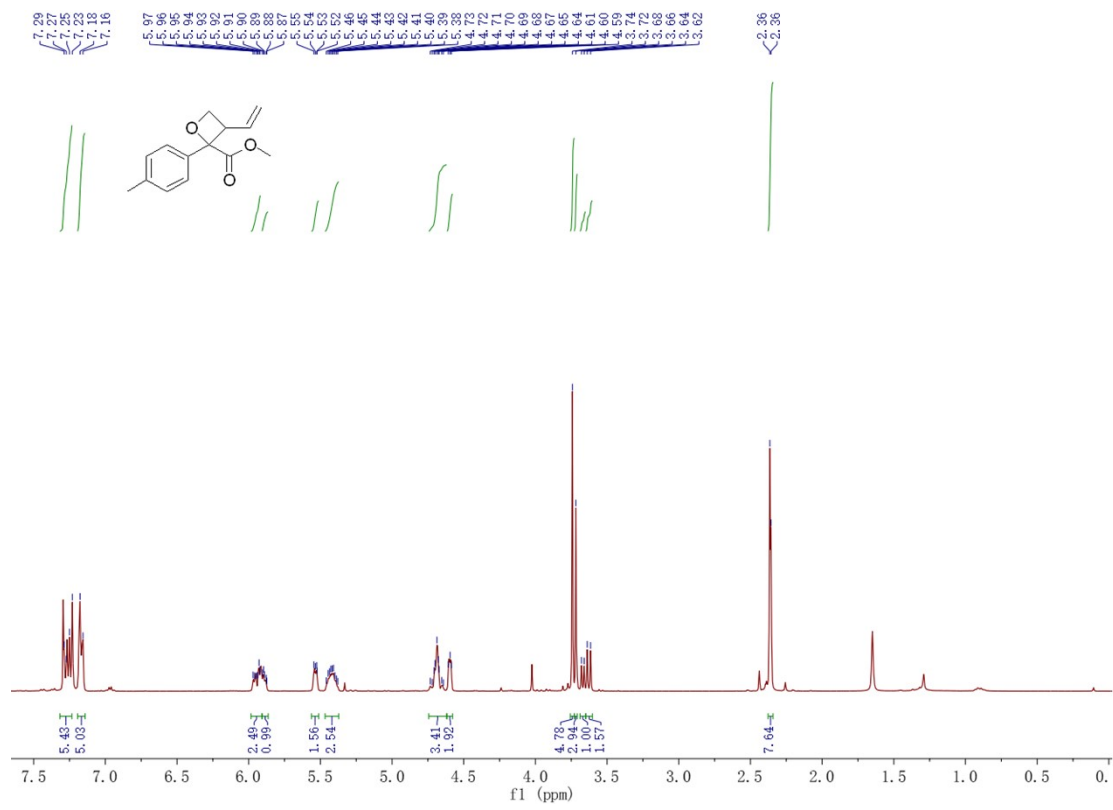

**<sup>13</sup>C NMR (101 MHz, CDCl<sub>3</sub>)**

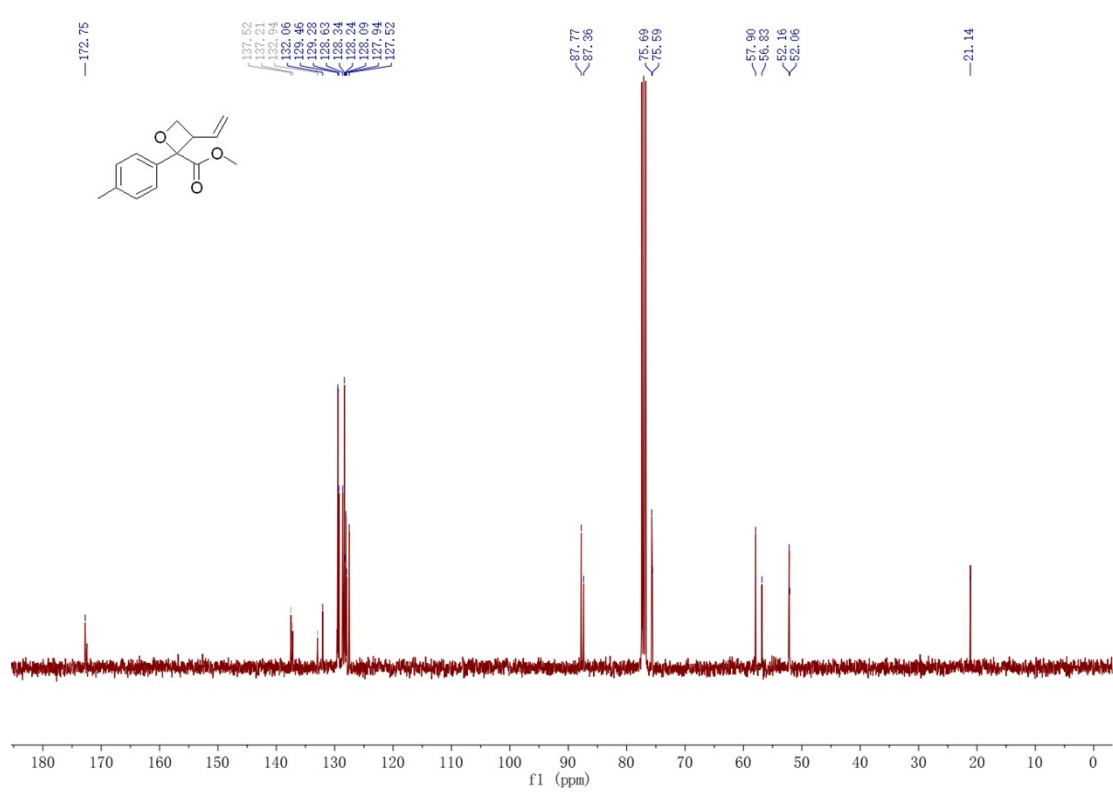









**<sup>19</sup>F NMR (376 MHz, CDCl<sub>3</sub>)**

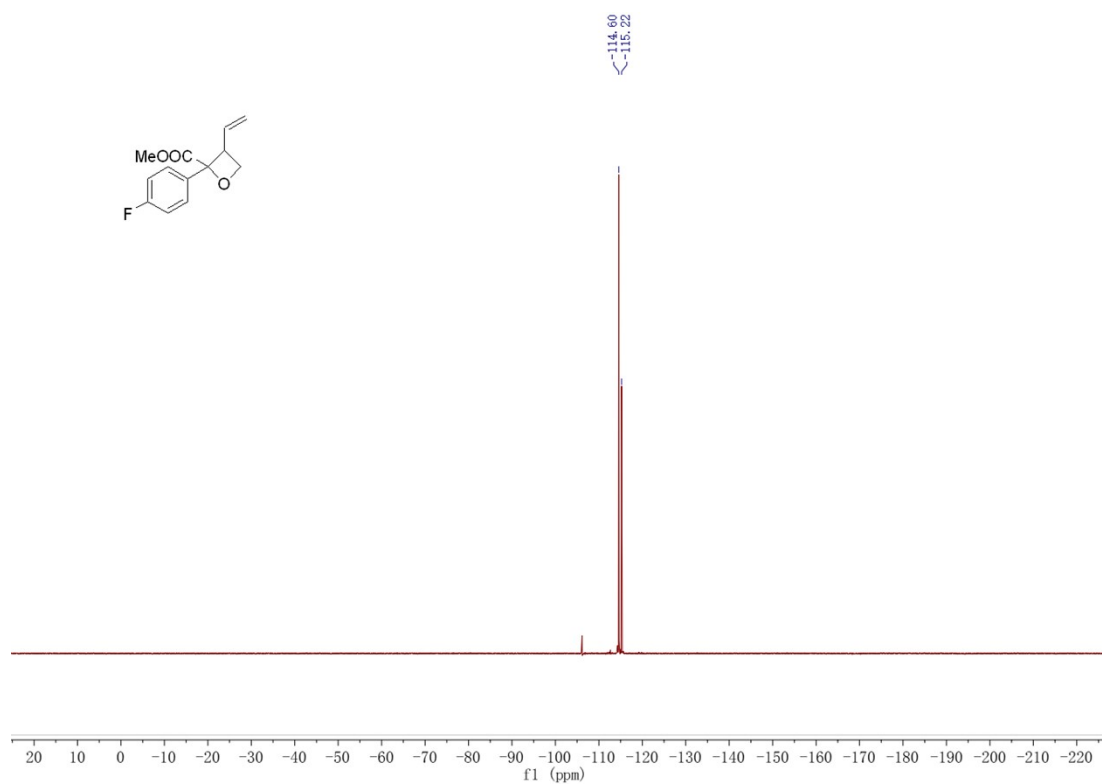

**30: <sup>1</sup>H NMR (400 MHz, CDCl<sub>3</sub>)**

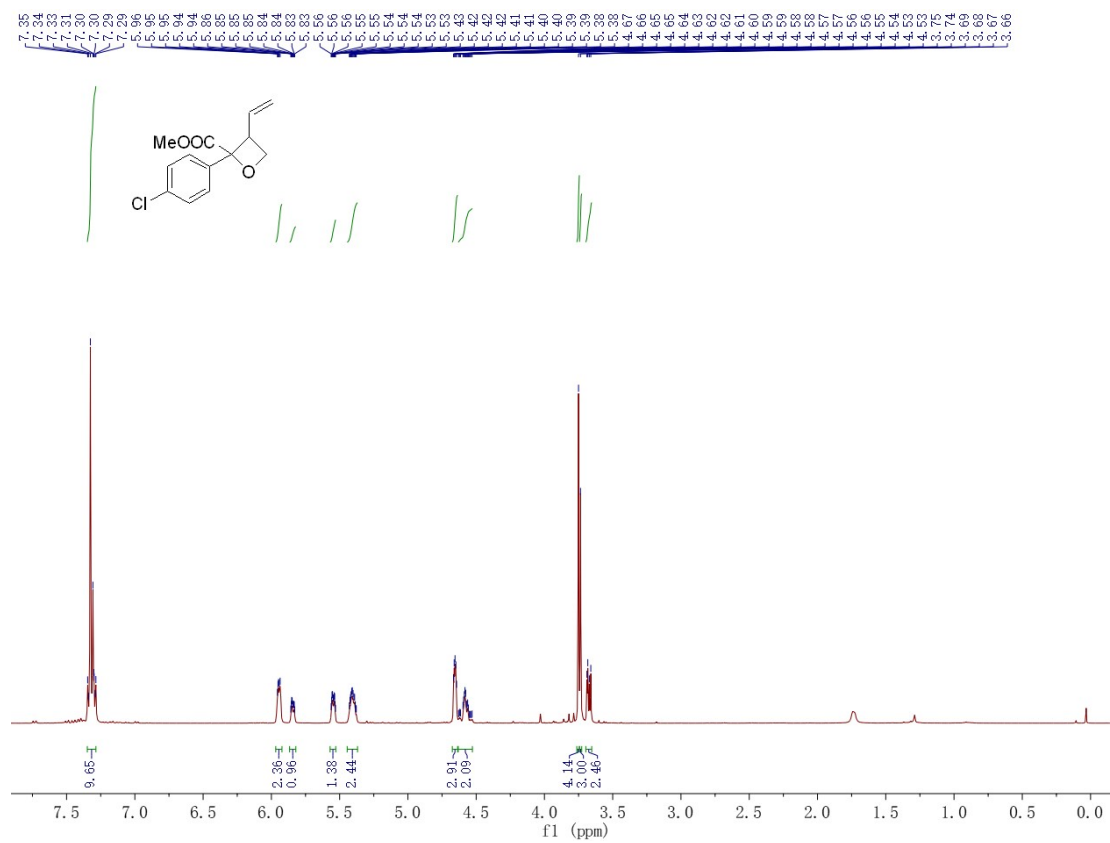

**$^{13}\text{C}$  NMR (101 MHz,  $\text{CDCl}_3$ )**

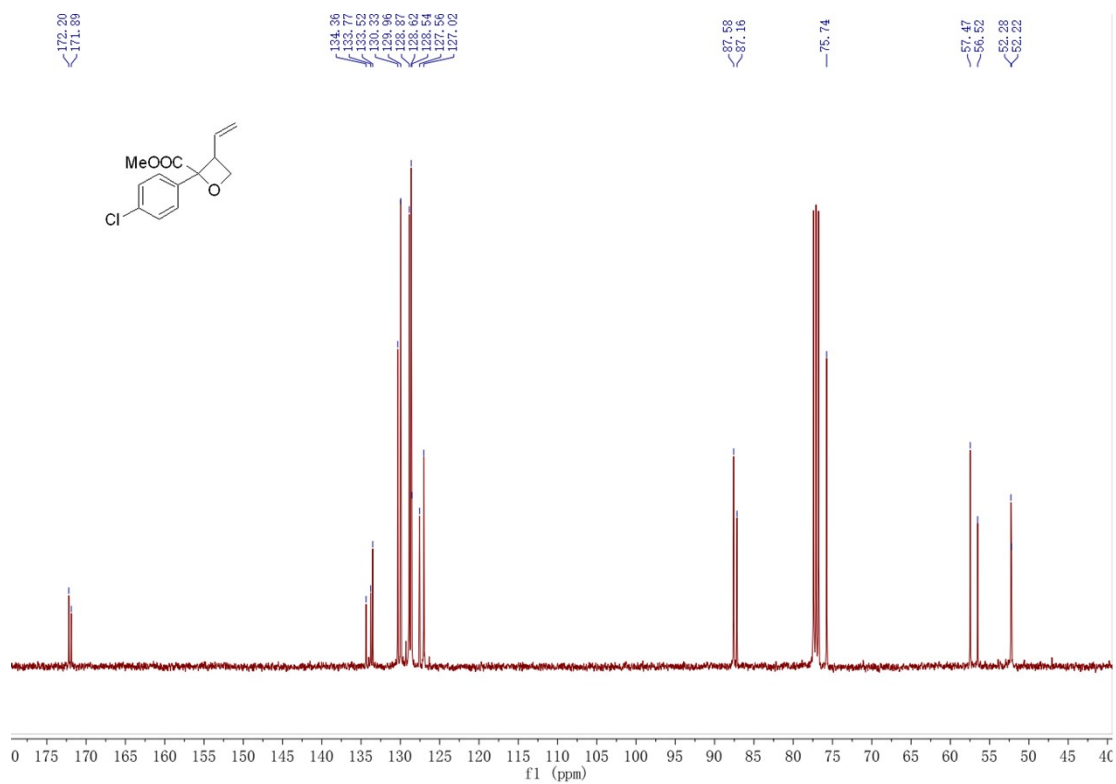

**$^1\text{H}$  NMR (400 MHz,  $\text{CDCl}_3$ )**

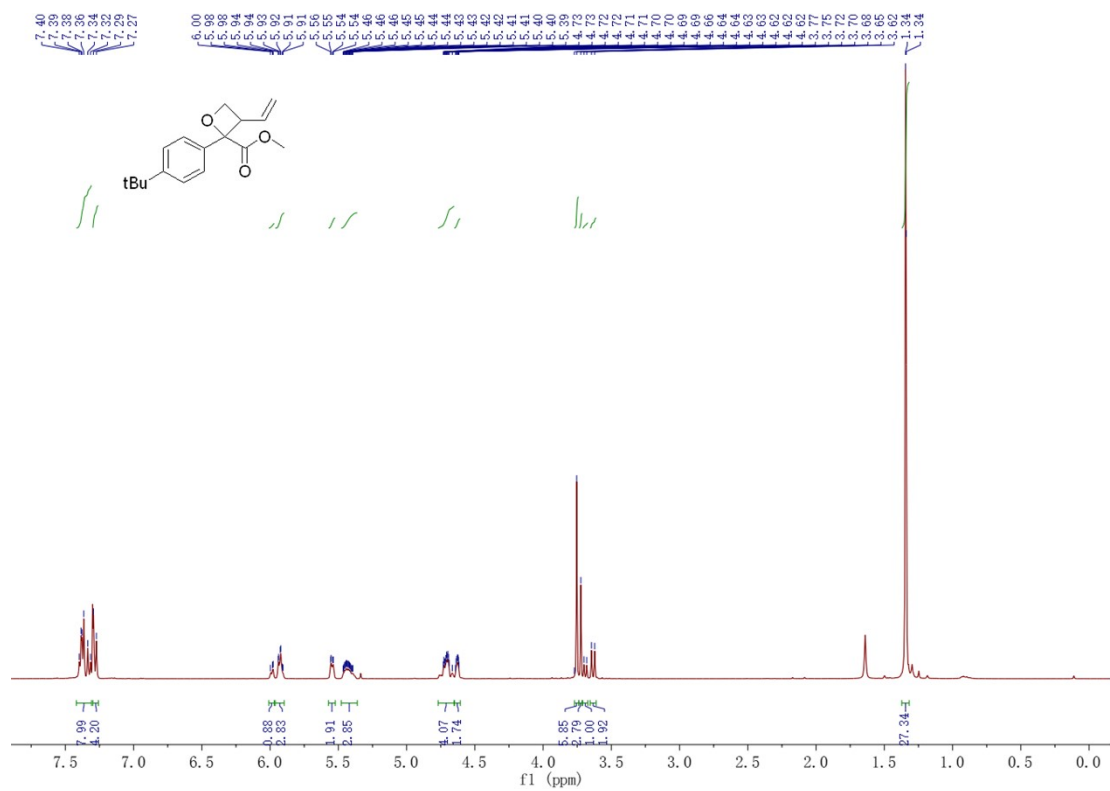

**$^{13}\text{C}$  NMR (101 MHz,  $\text{CDCl}_3$ )**

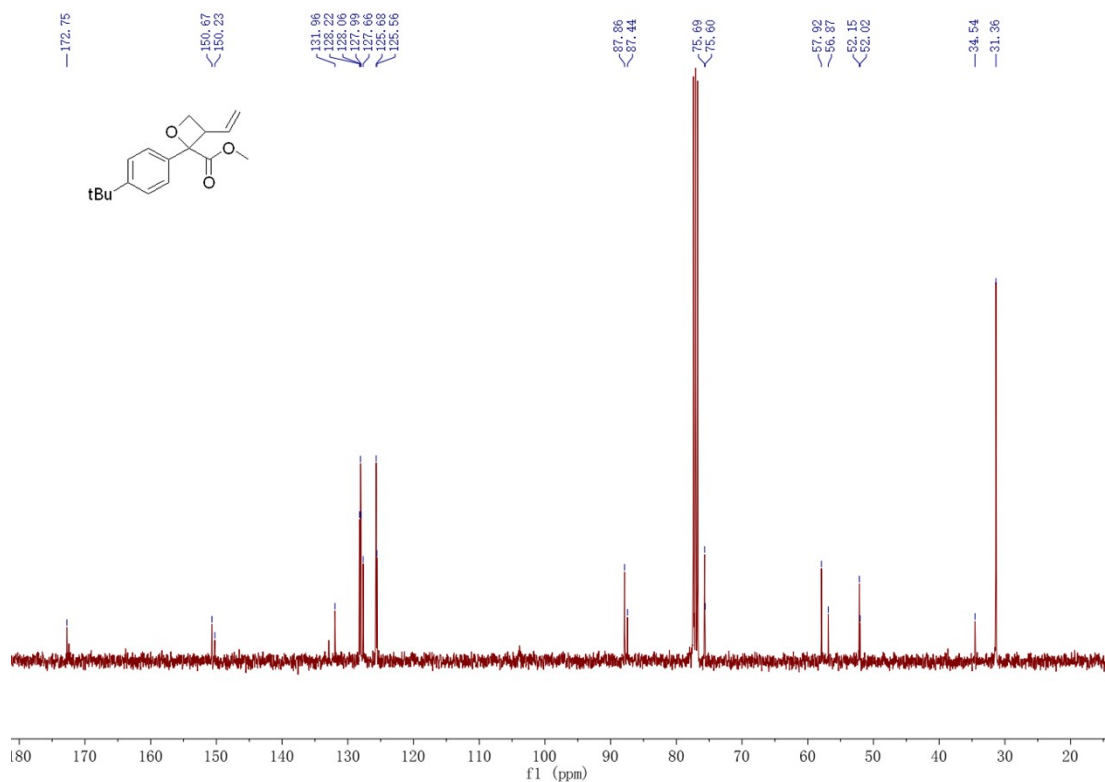

**$^1\text{H}$  NMR (400 MHz,  $\text{CDCl}_3$ )**

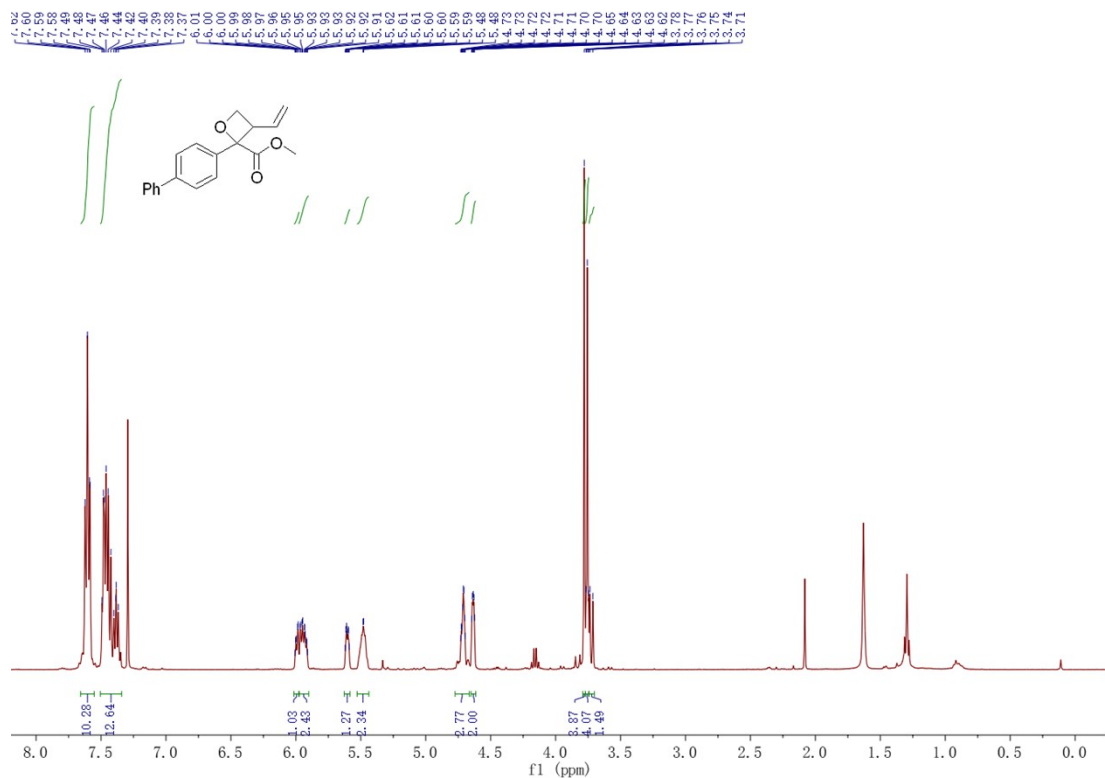

**<sup>13</sup>C NMR (101 MHz, CDCl<sub>3</sub>)**

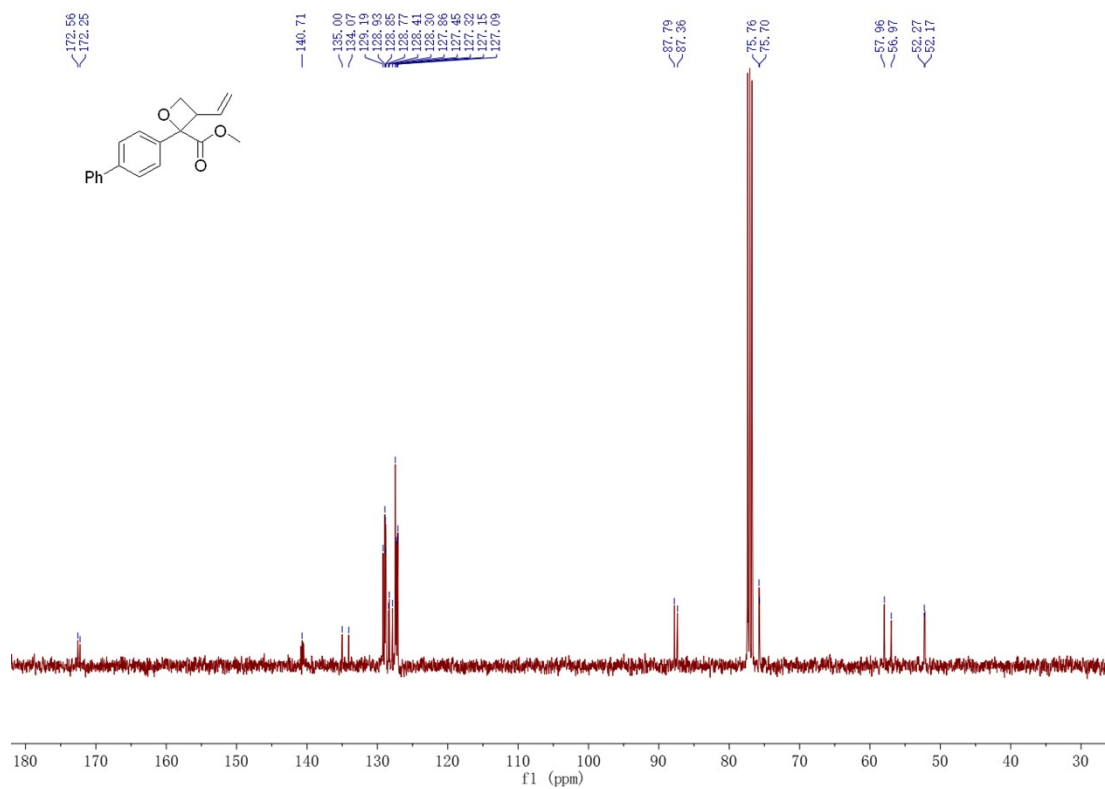

**3r: <sup>1</sup>H NMR (400 MHz, CDCl<sub>3</sub>)**

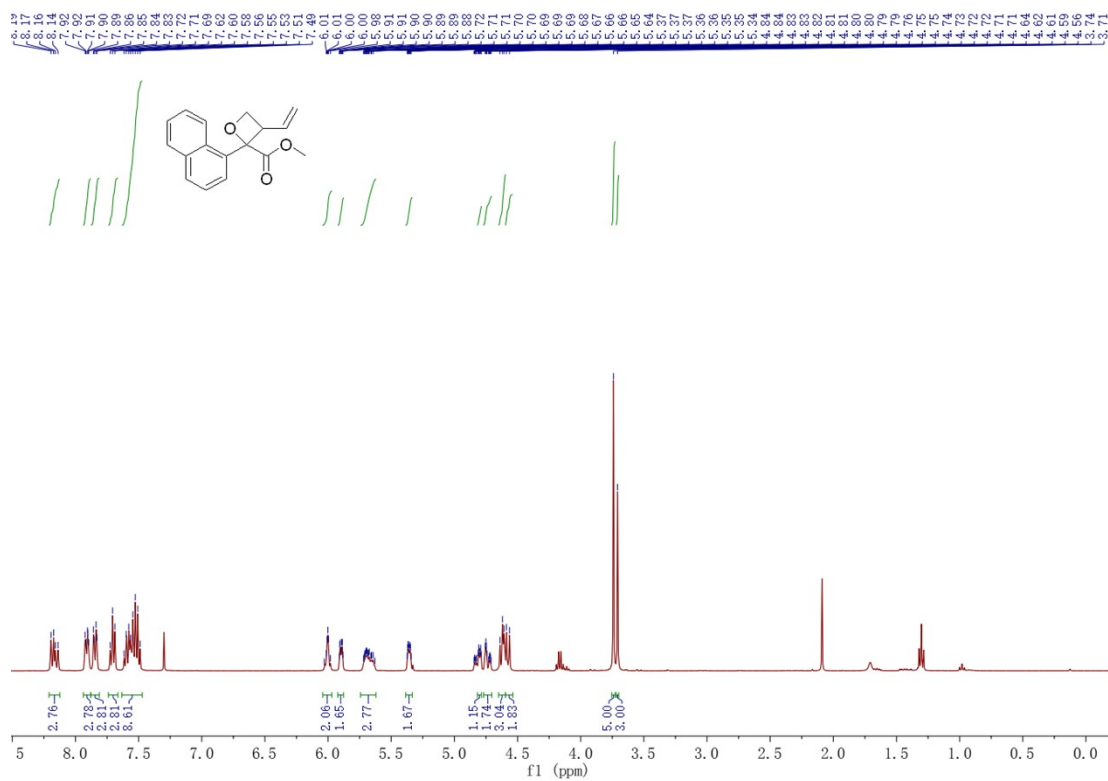

**<sup>13</sup>C NMR (101 MHz, CDCl<sub>3</sub>)**

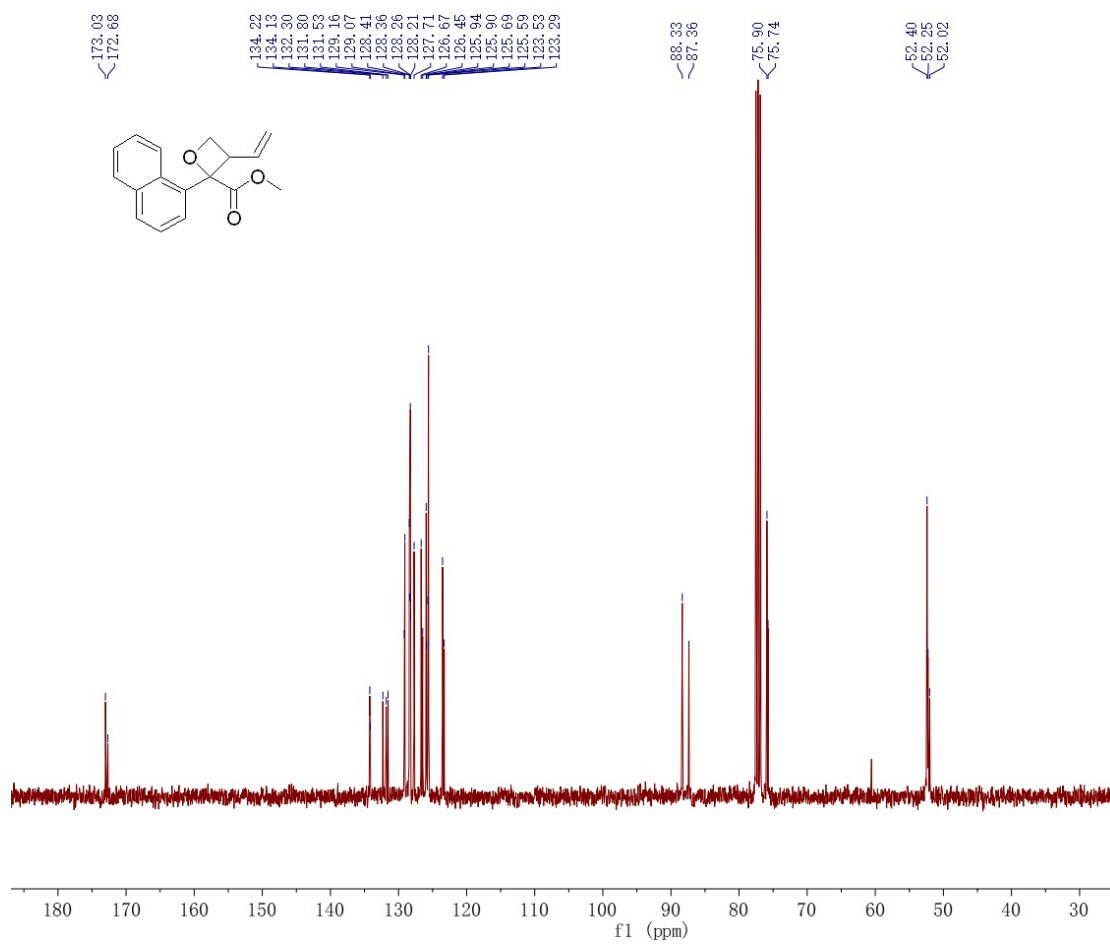

**3s: <sup>1</sup>H NMR (400 MHz, CDCl<sub>3</sub>)**



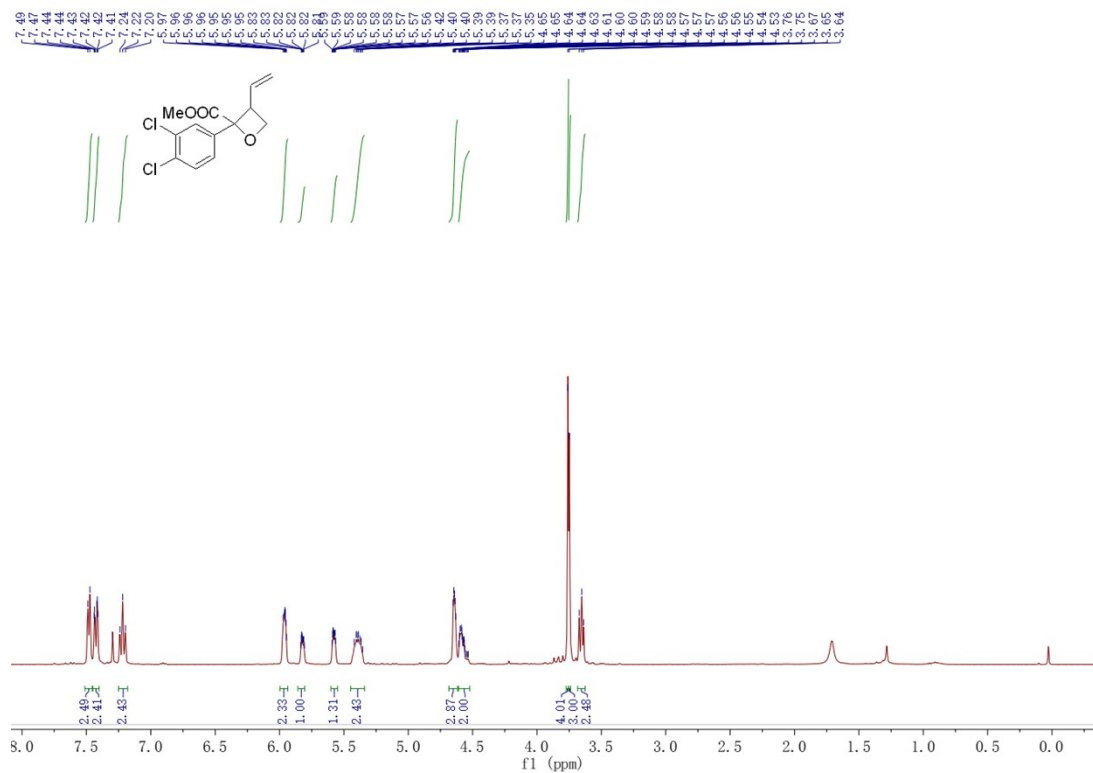

**<sup>13</sup>C NMR (101 MHz, CDCl<sub>3</sub>)**

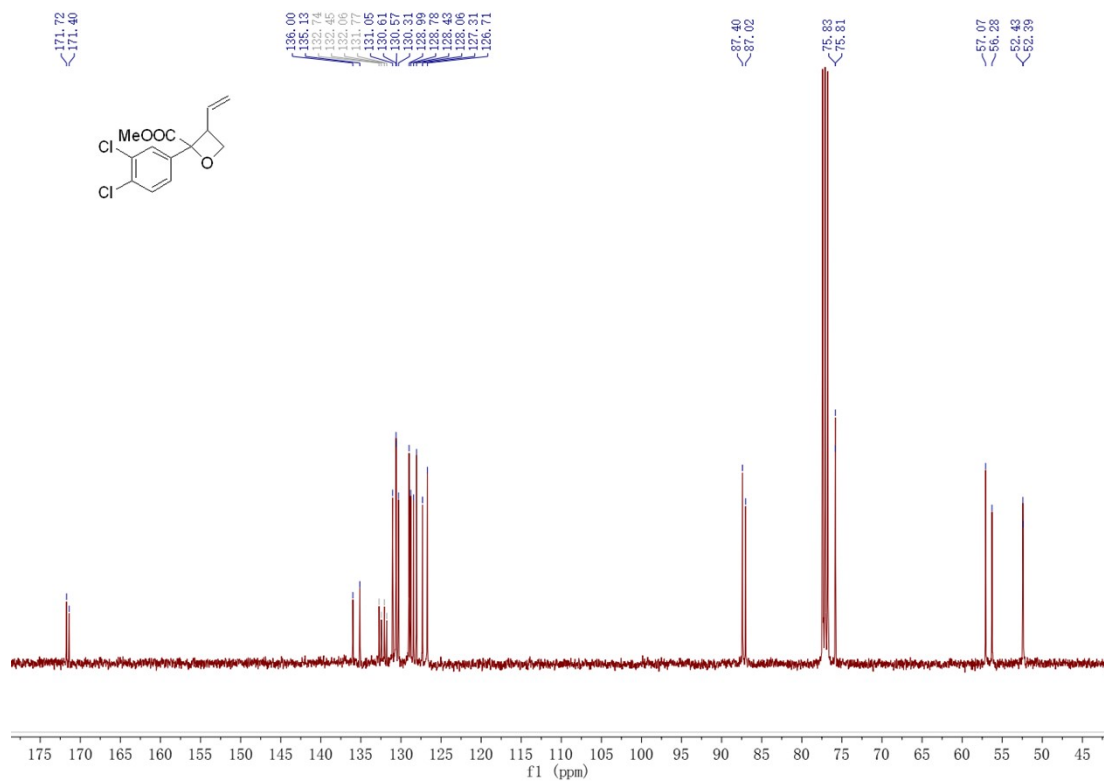

**3t: <sup>1</sup>H NMR (400 MHz, CDCl<sub>3</sub>)**

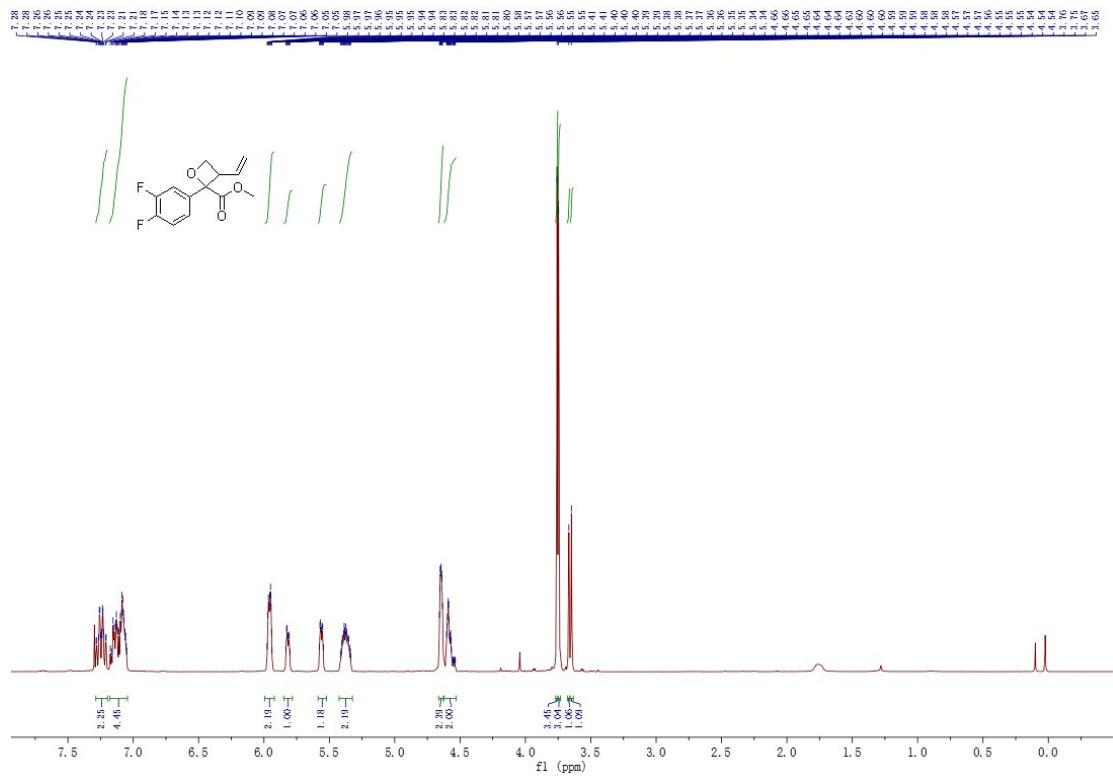

**<sup>13</sup>C NMR (101 MHz, CDCl<sub>3</sub>)**

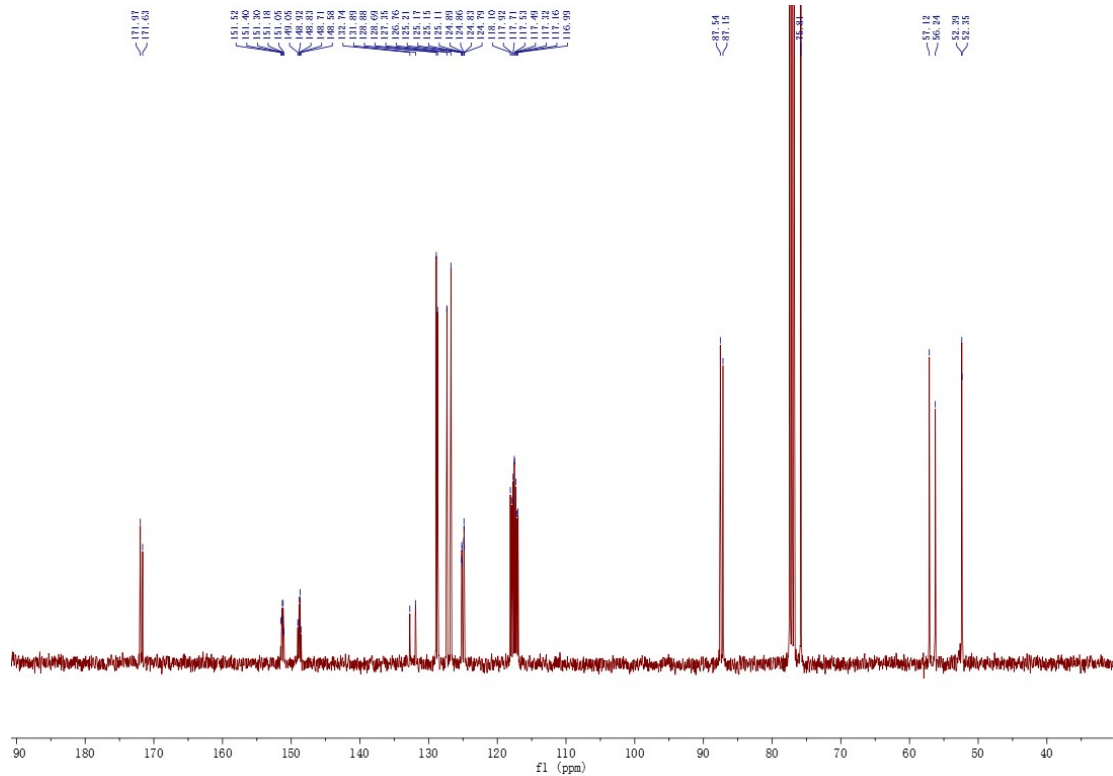

**<sup>19</sup>F NMR (376 MHz, CDCl<sub>3</sub>)**

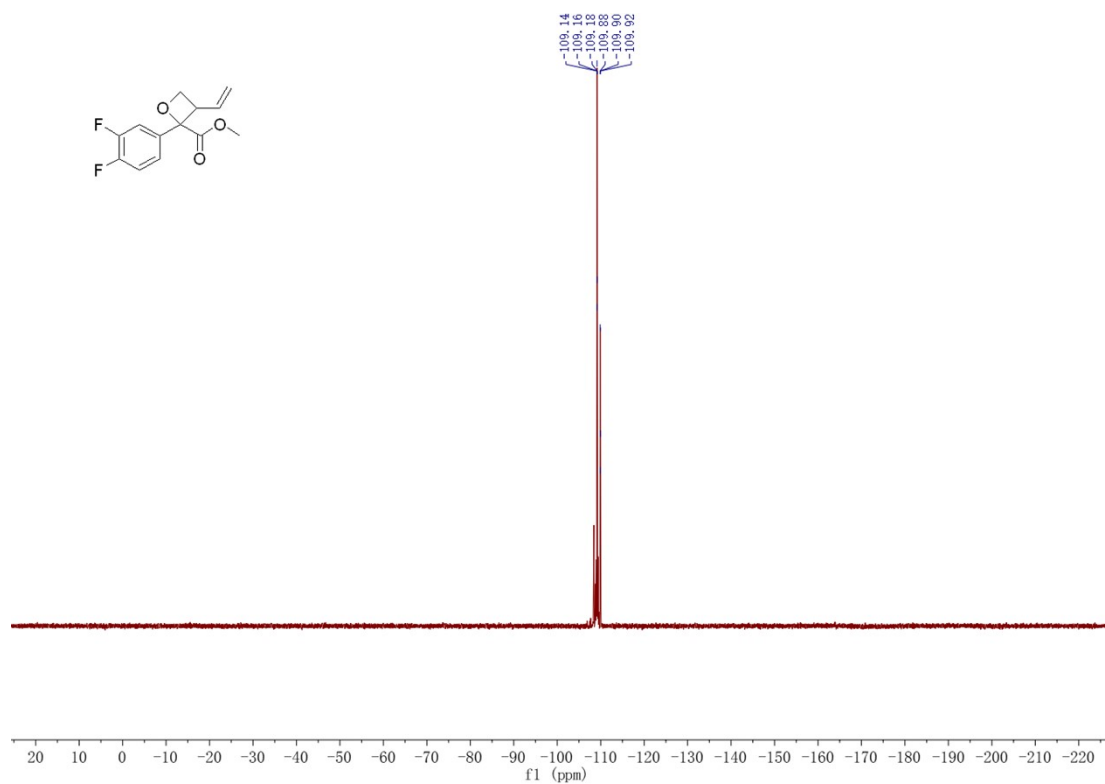

**3u: <sup>1</sup>H NMR (400 MHz, CDCl<sub>3</sub>)**

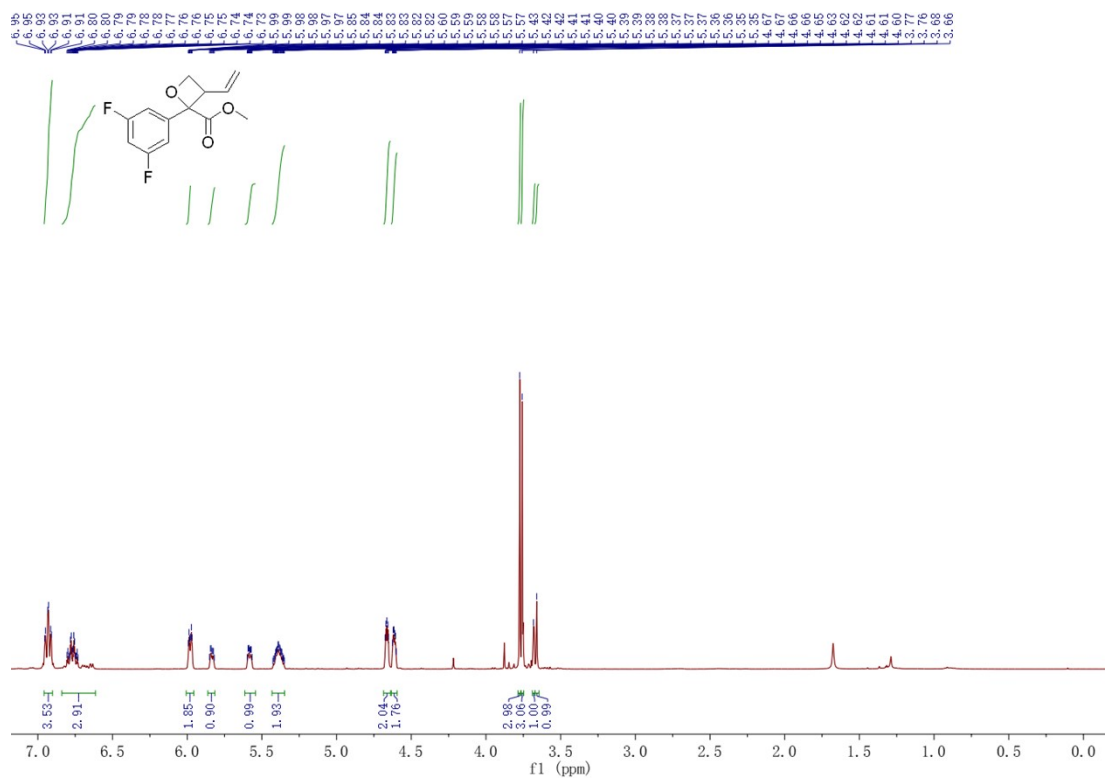

**<sup>13</sup>C NMR (101 MHz, CDCl<sub>3</sub>)**

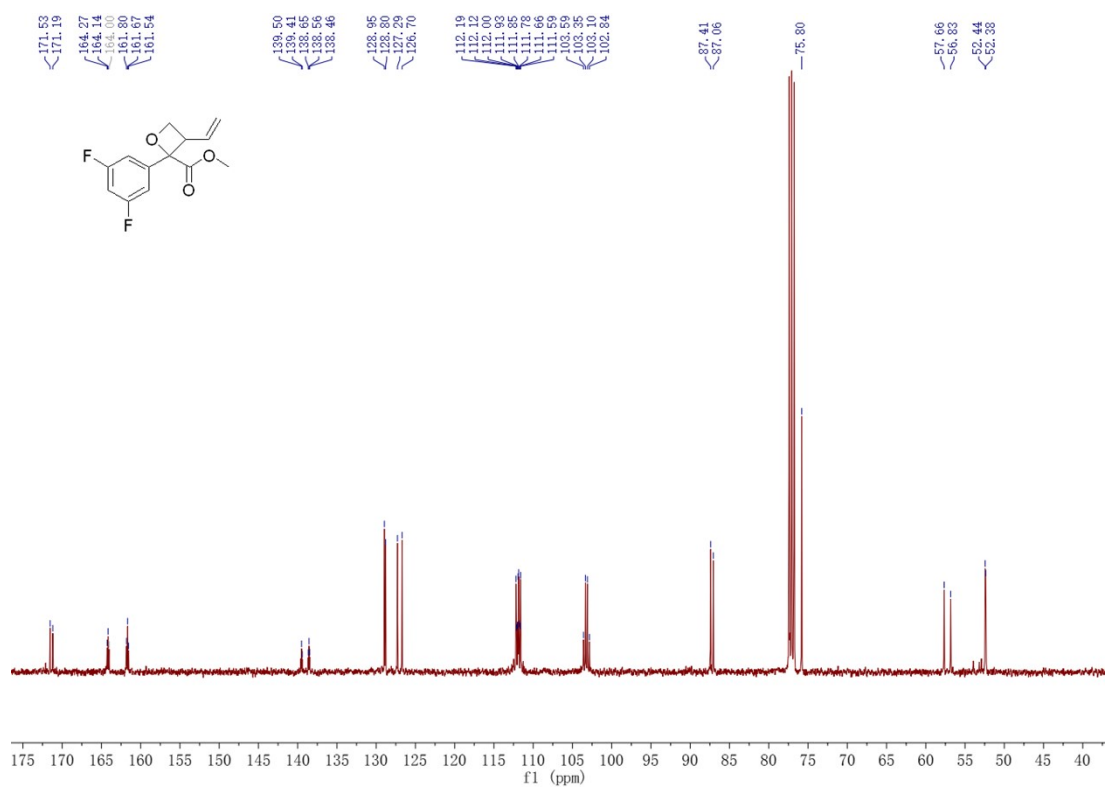

**<sup>19</sup>F NMR (376 MHz, CDCl<sub>3</sub>)**

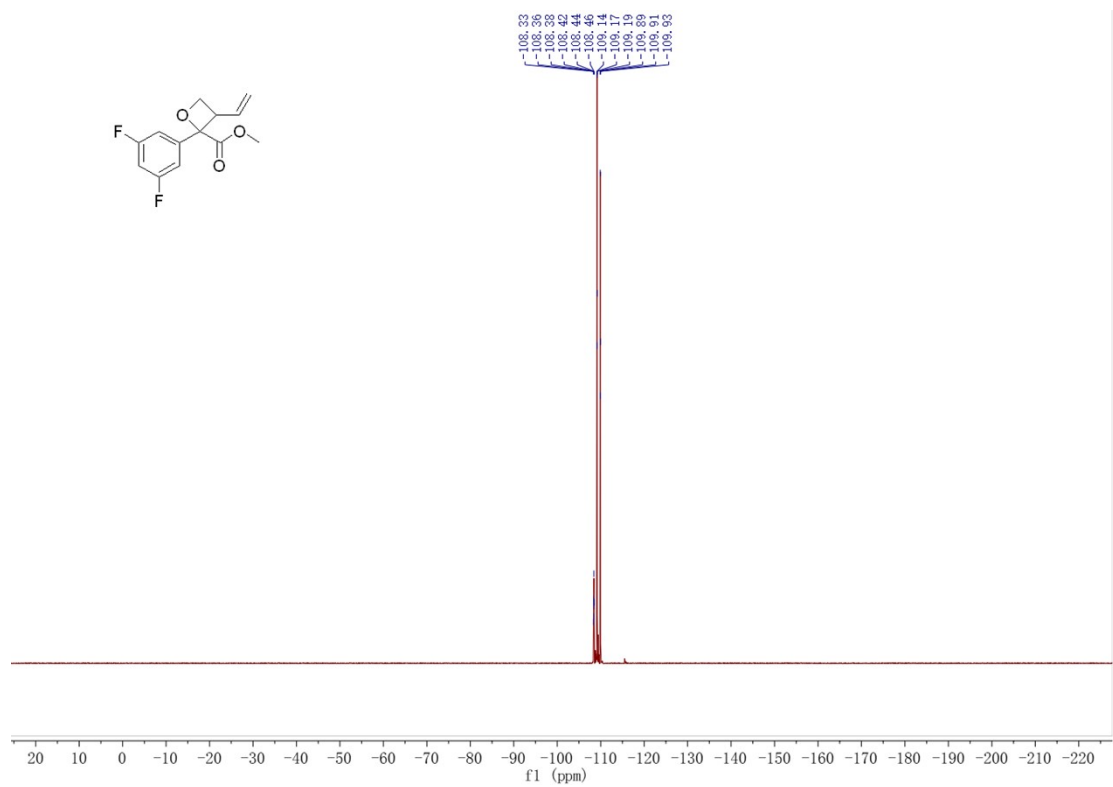

**3v: <sup>1</sup>H NMR (400 MHz, CDCl<sub>3</sub>)**

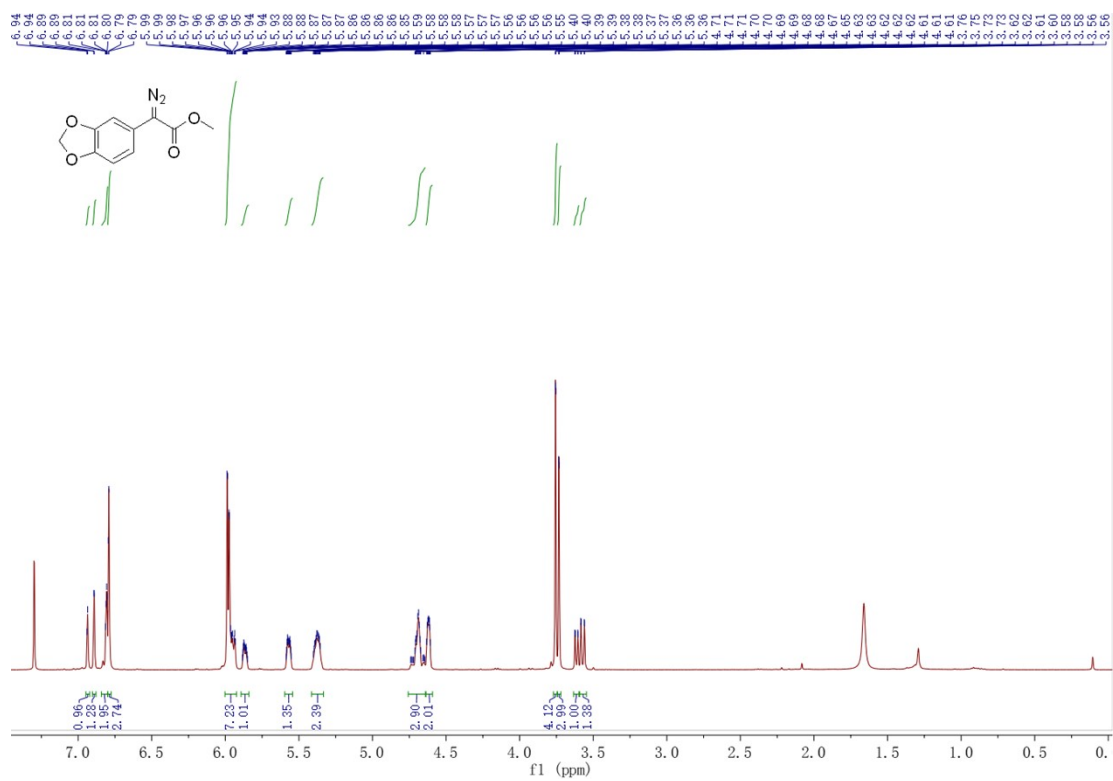

**<sup>13</sup>C NMR (101 MHz, CDCl<sub>3</sub>)**

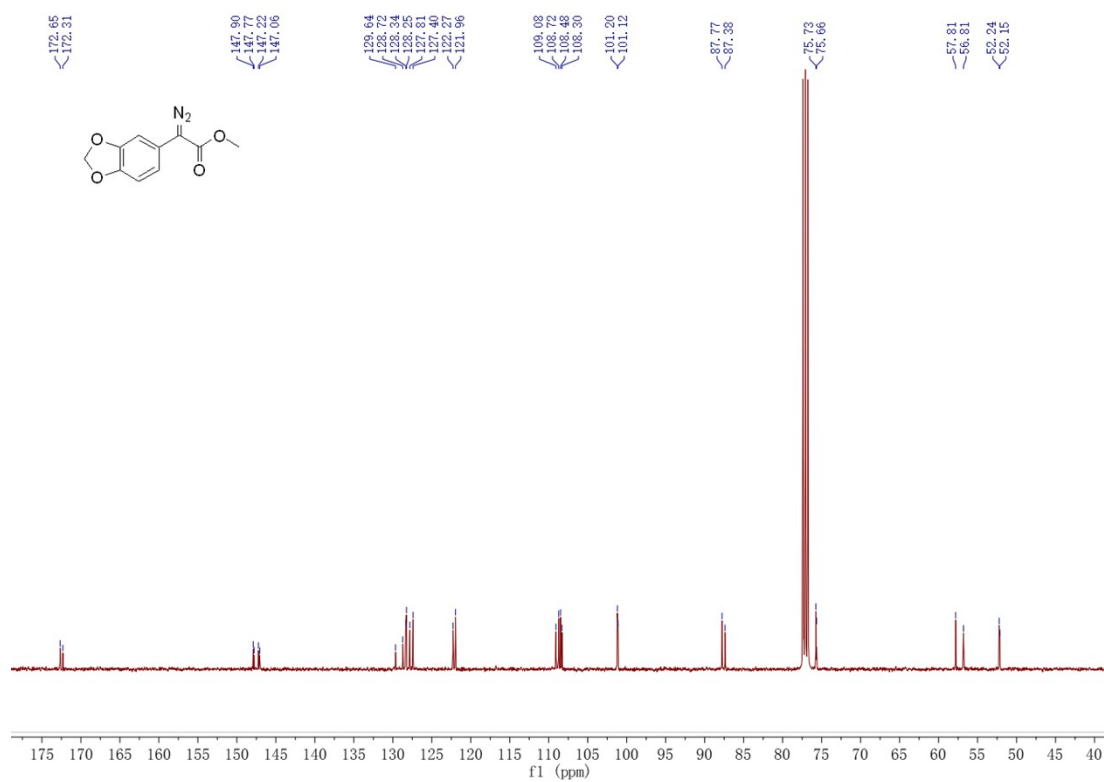

**3w: <sup>1</sup>H NMR (400 MHz, CDCl<sub>3</sub>)**

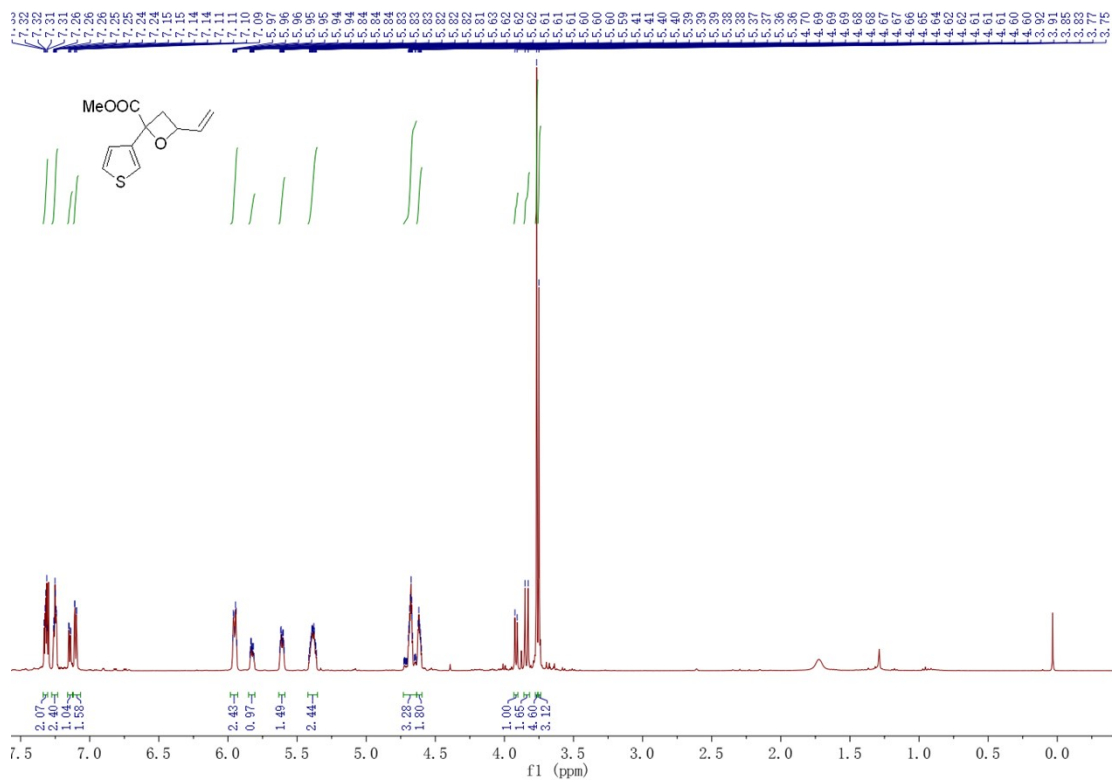

**<sup>13</sup>C NMR (101 MHz, CDCl<sub>3</sub>)**

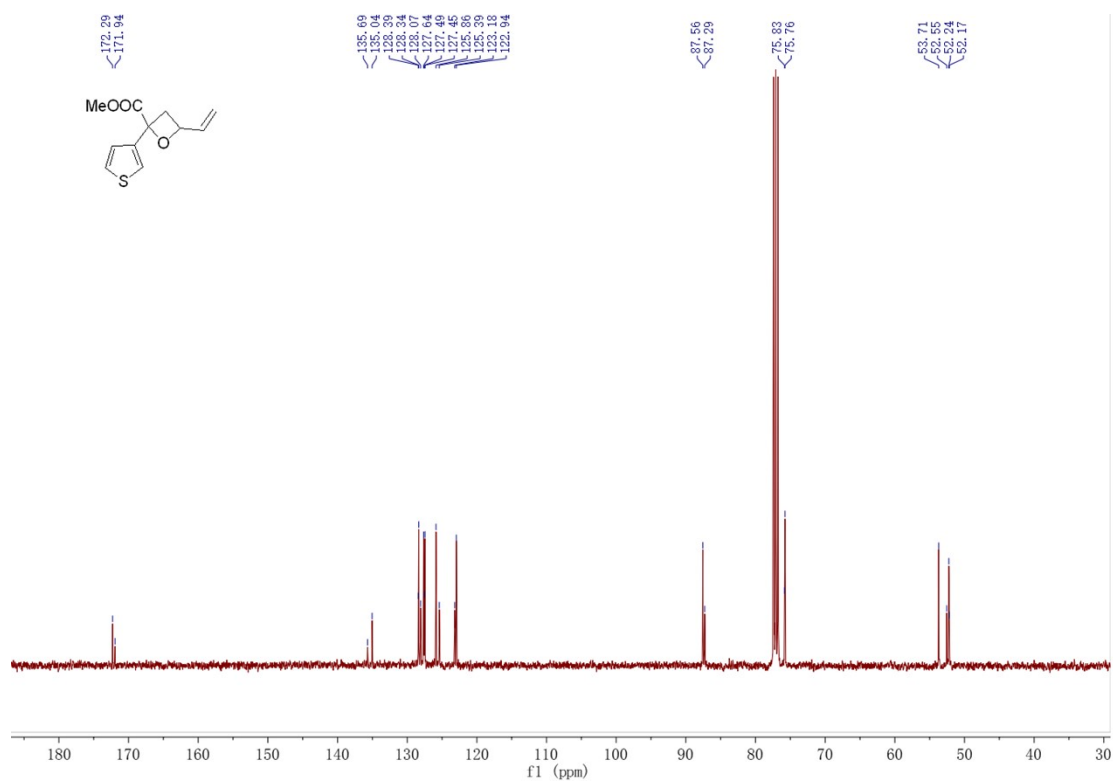

**3x: <sup>1</sup>H NMR (400 MHz, CDCl<sub>3</sub>)**

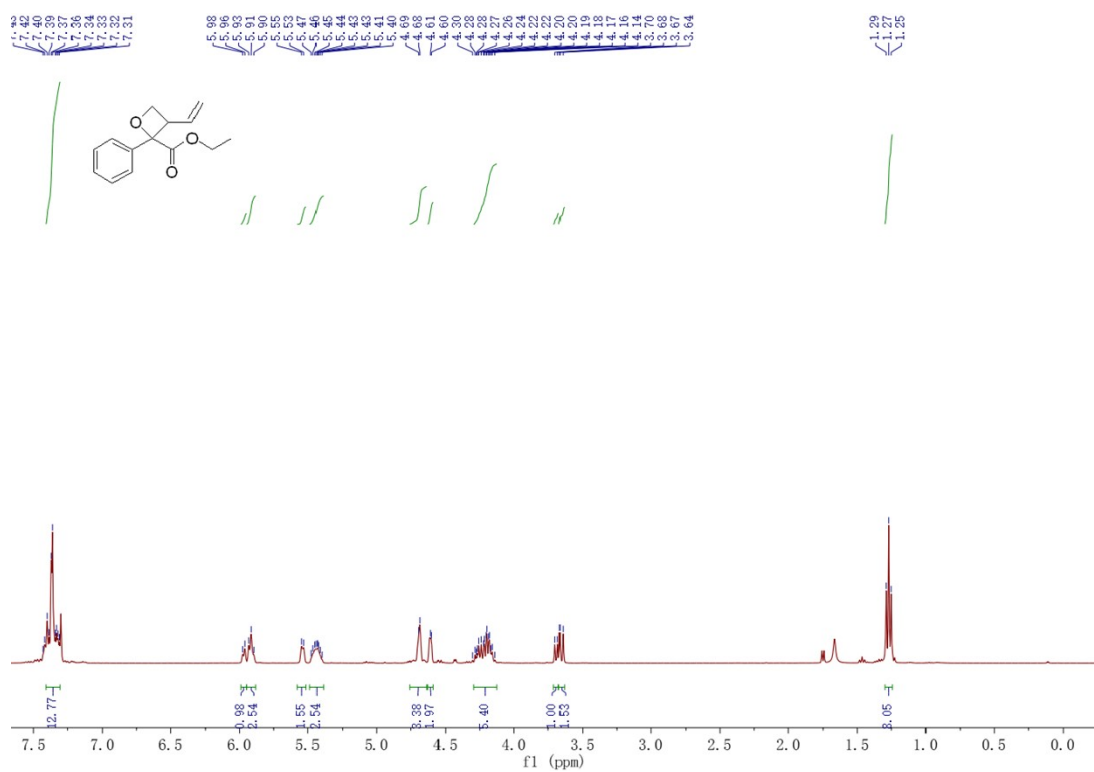

**<sup>13</sup>C NMR (101 MHz, CDCl<sub>3</sub>)**

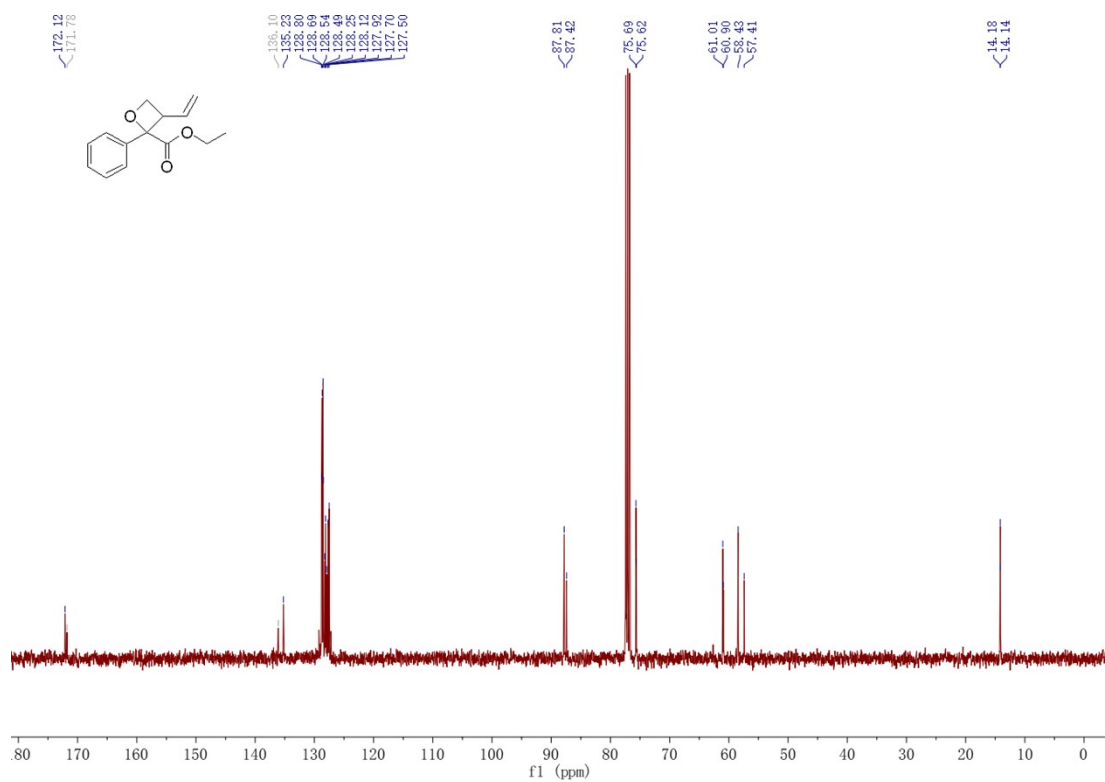

**3y: <sup>1</sup>H NMR (400 MHz, CDCl<sub>3</sub>)**

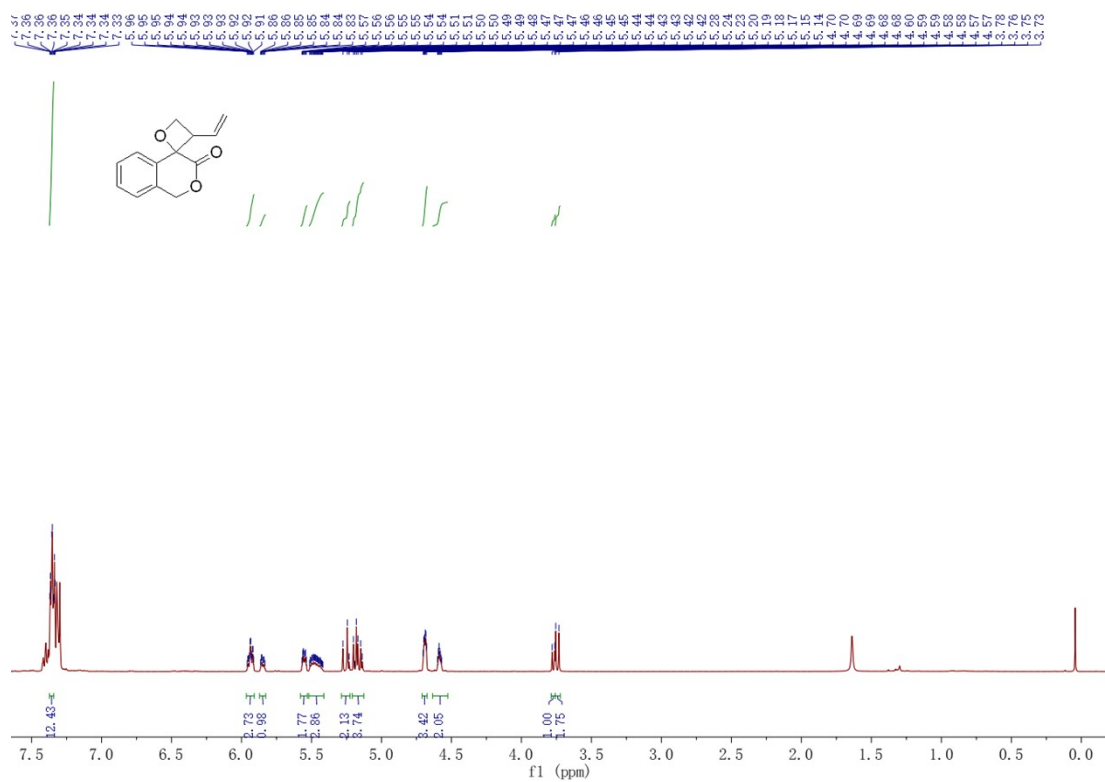



**<sup>13</sup>C NMR (101 MHz, CDCl<sub>3</sub>)**

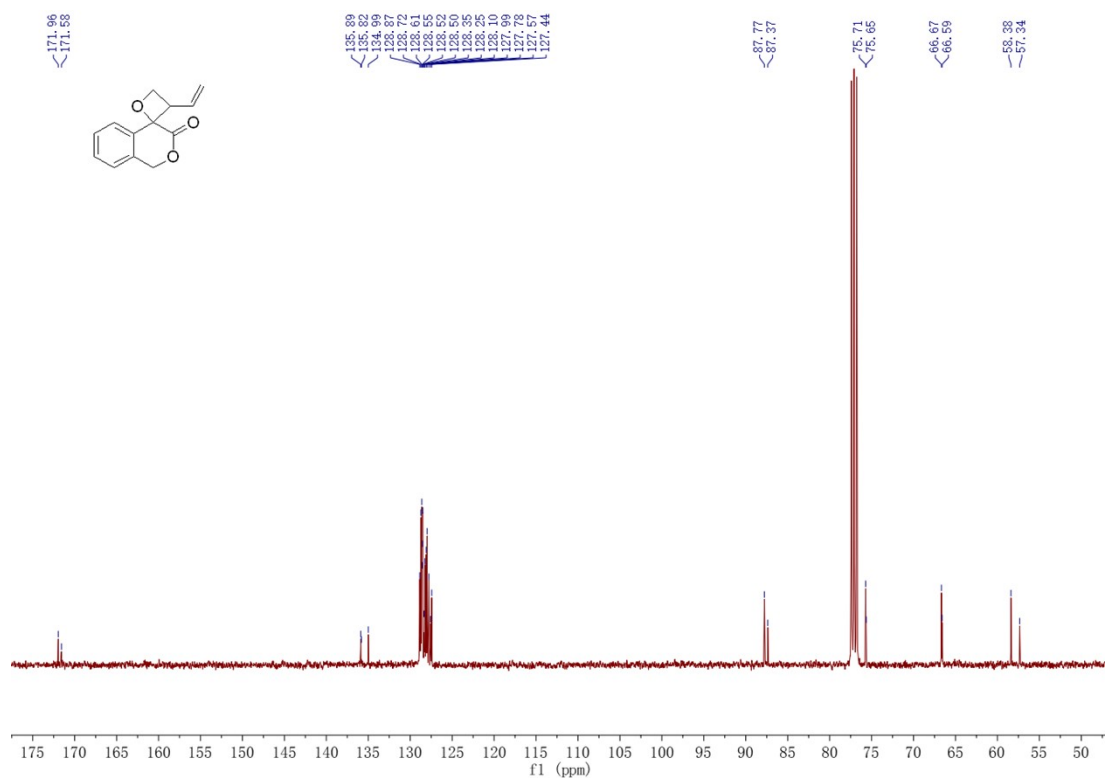

**3z: <sup>1</sup>H NMR (400 MHz, CDCl<sub>3</sub>)**

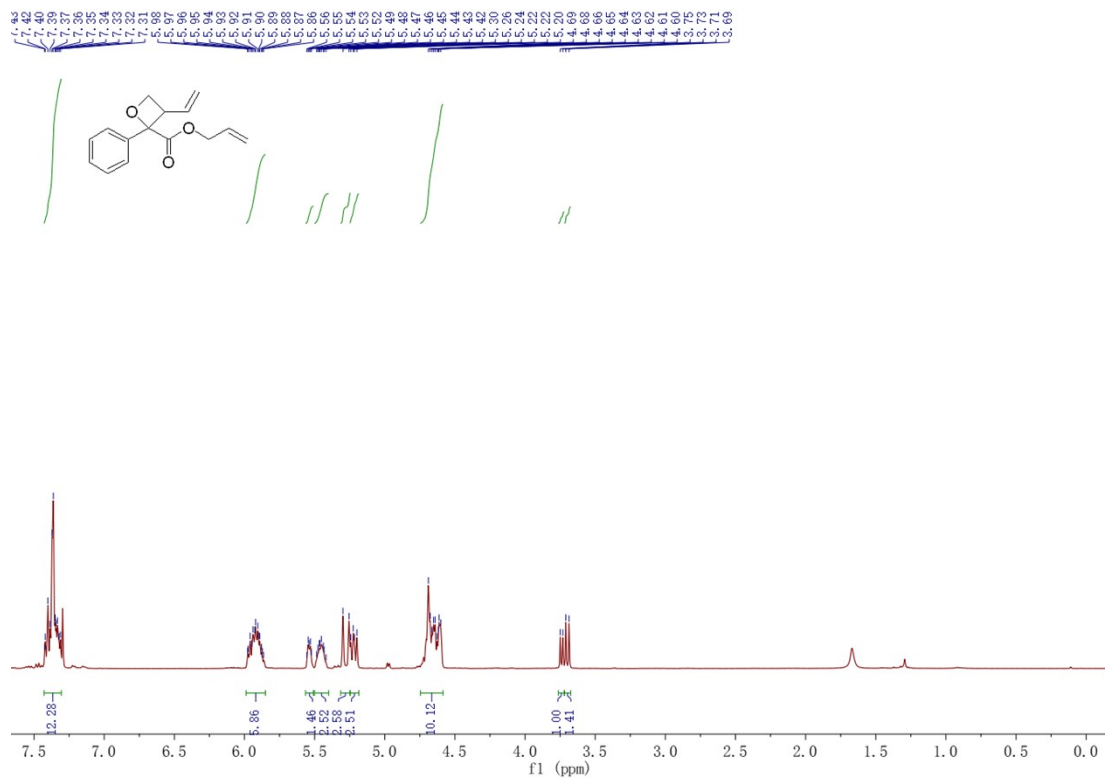

**$^{13}\text{C}$  NMR (101 MHz,  $\text{CDCl}_3$ )**

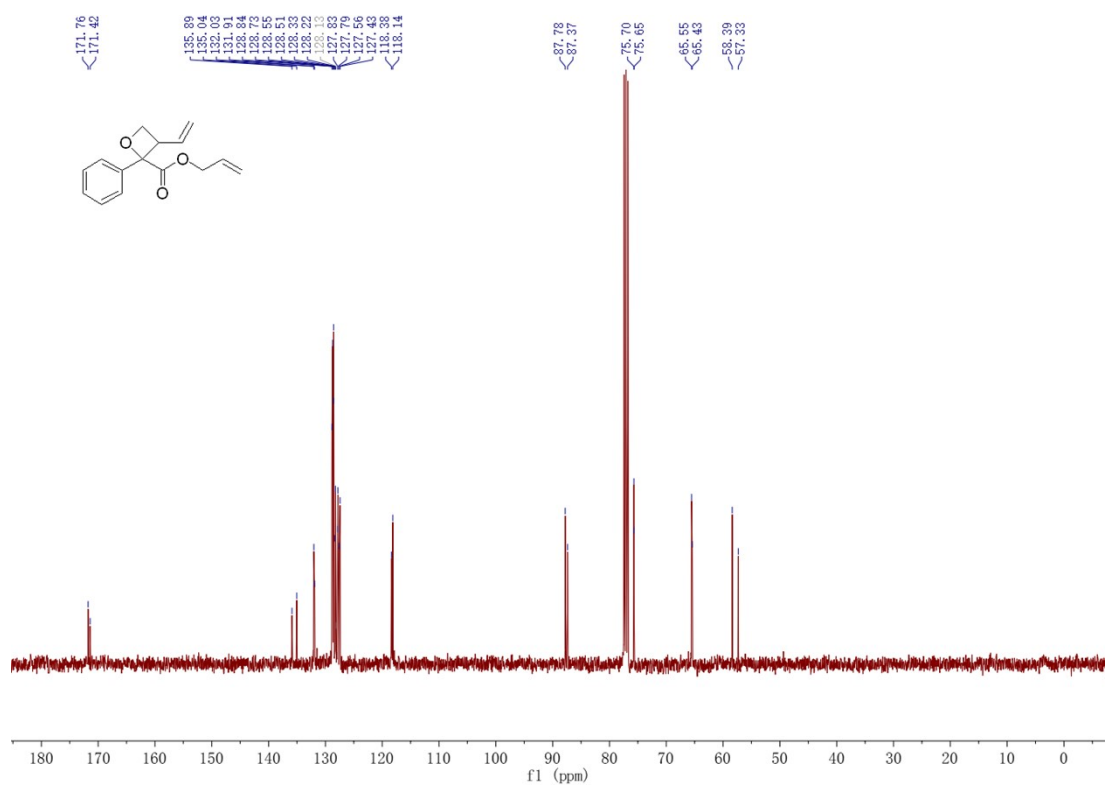

**3aa:  $^1\text{H}$  NMR (400 MHz,  $\text{CDCl}_3$ )**

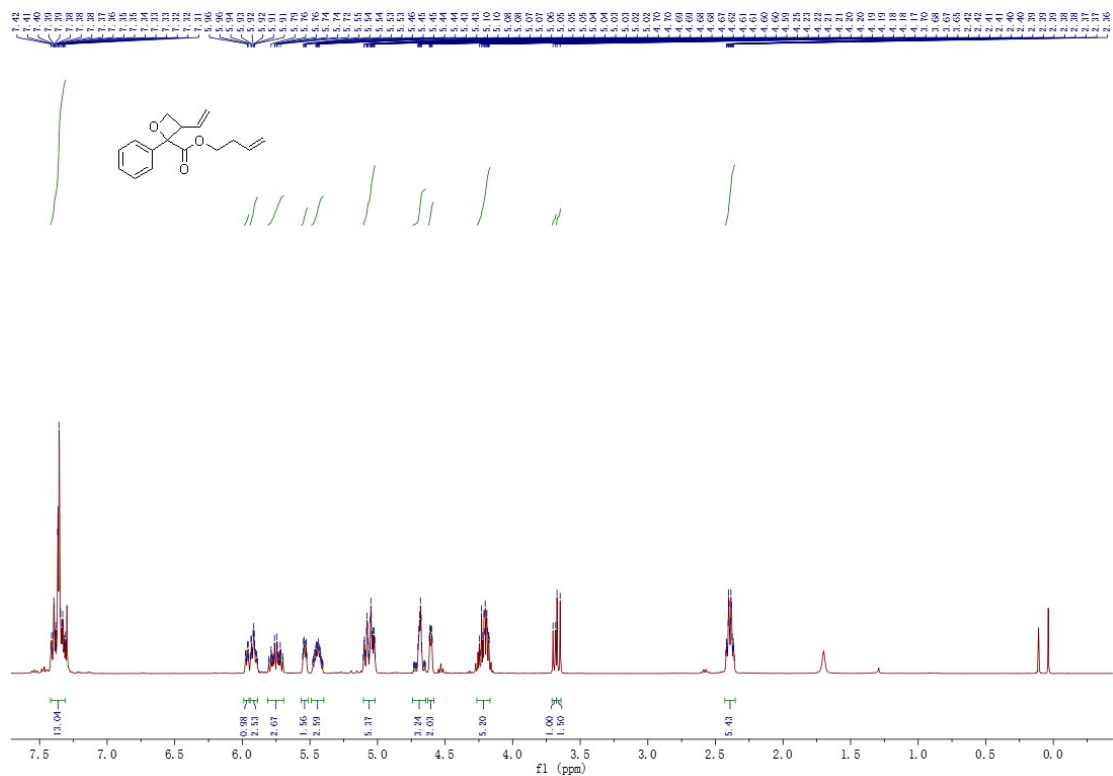

**<sup>13</sup>C NMR (101 MHz, CDCl<sub>3</sub>)**

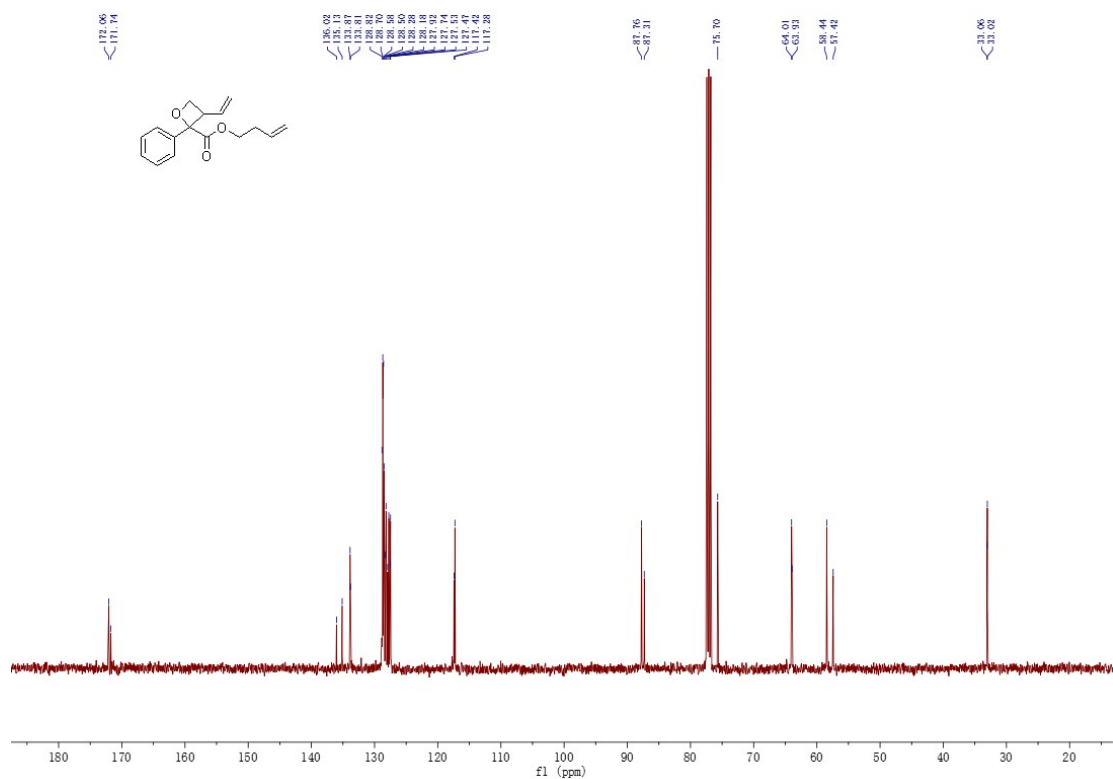

**3bb: <sup>1</sup>H NMR (400 MHz, CDCl<sub>3</sub>)**

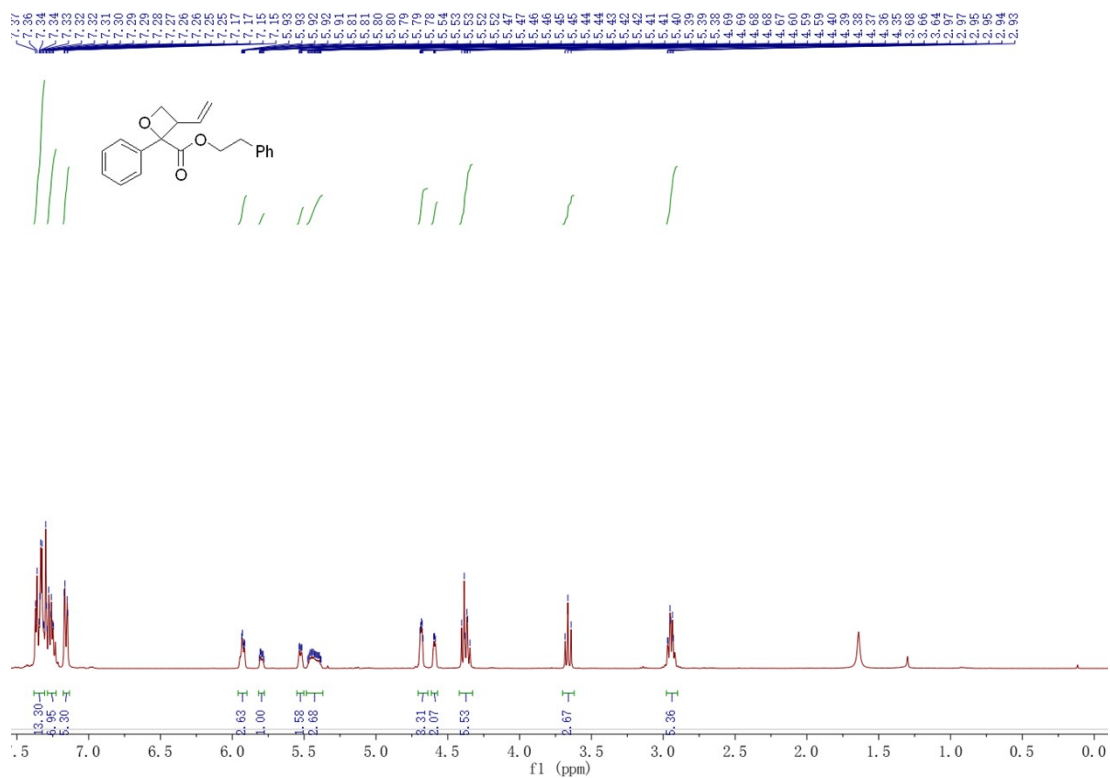

**<sup>13</sup>C NMR (101 MHz, CDCl<sub>3</sub>)**

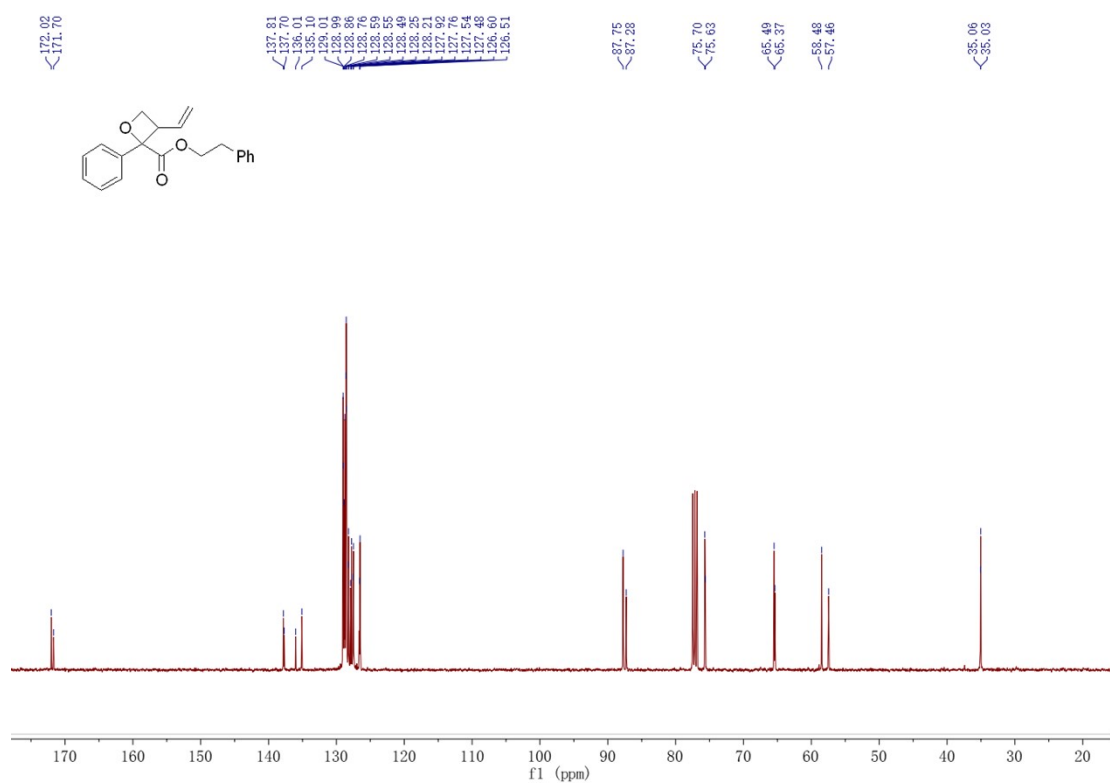

**3cc: <sup>1</sup>H NMR (400 MHz, CDCl<sub>3</sub>)**

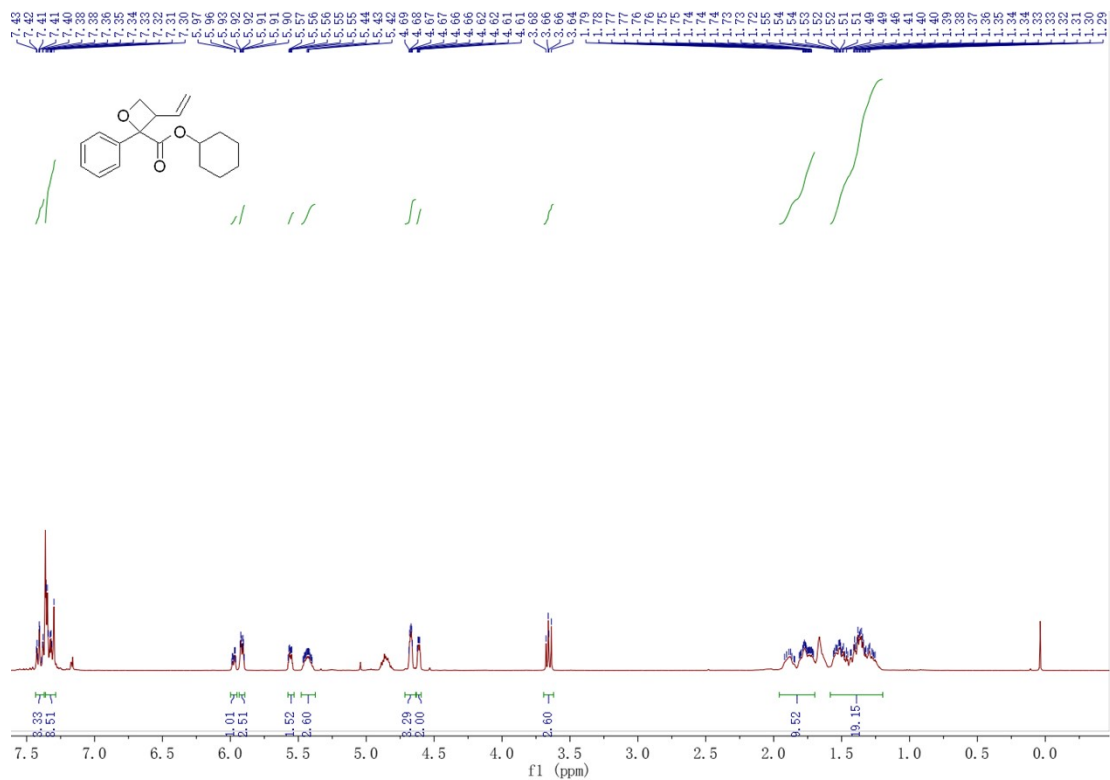

**<sup>13</sup>C NMR (101 MHz, CDCl<sub>3</sub>)**

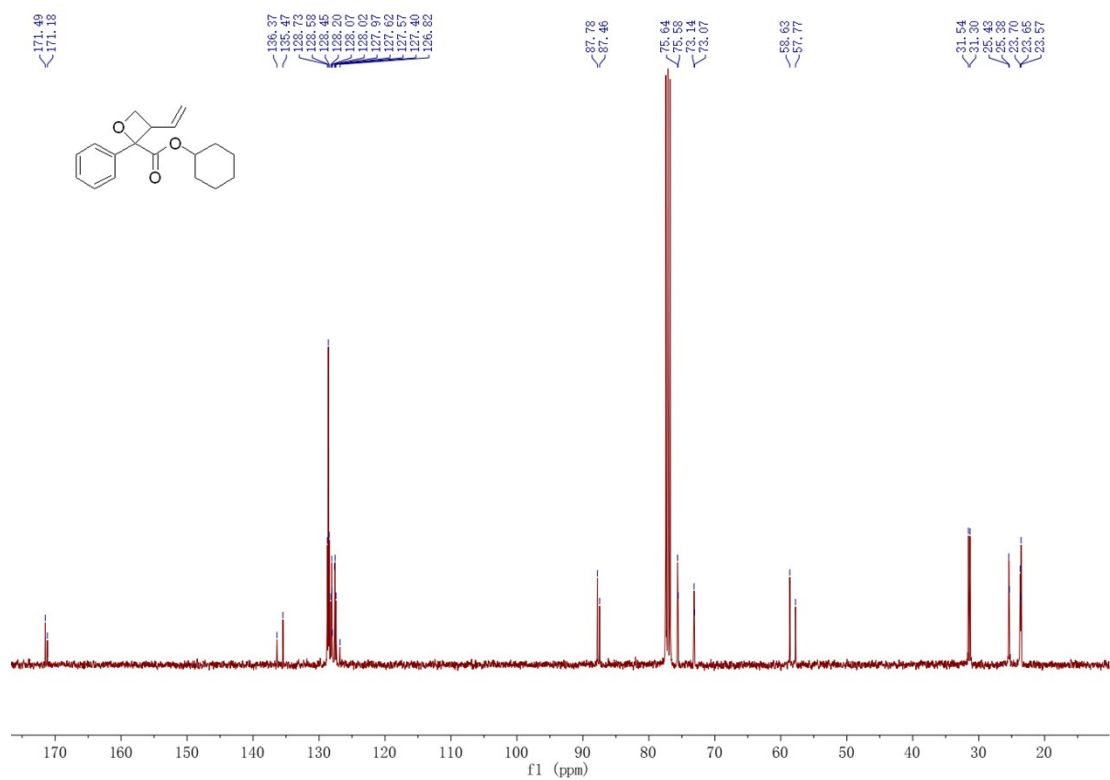

**3dd: <sup>1</sup>H NMR (400 MHz, CDCl<sub>3</sub>)**

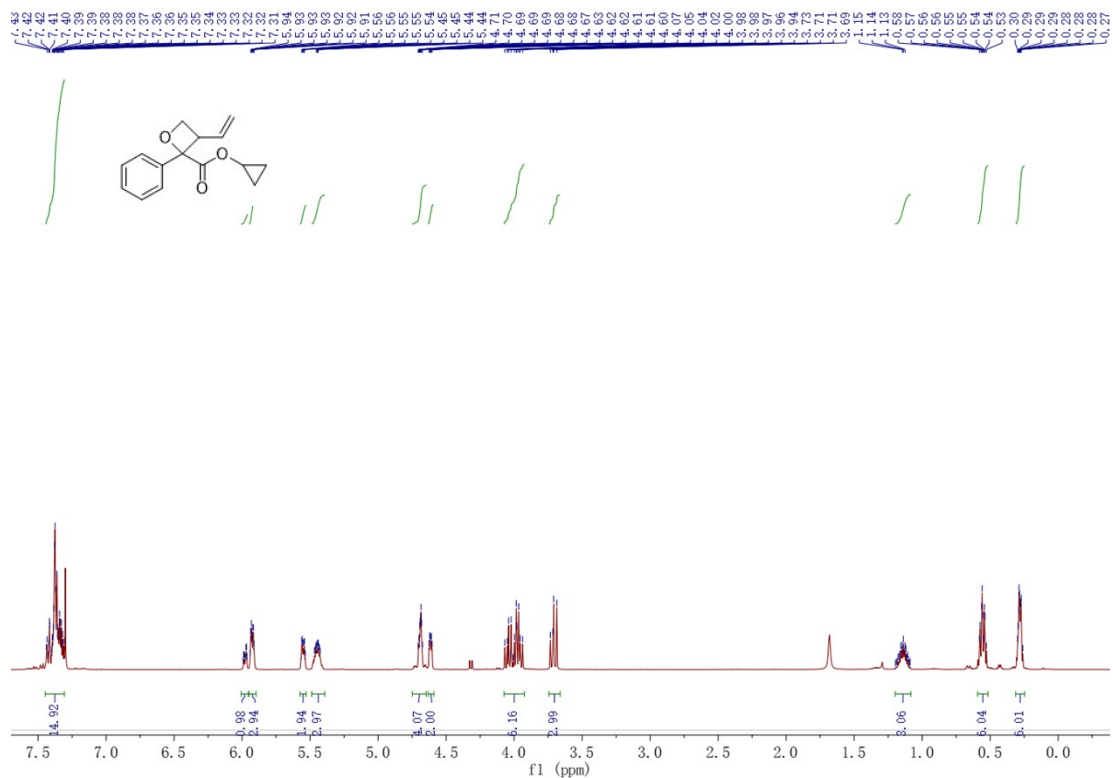

**<sup>13</sup>C NMR (101 MHz, CDCl<sub>3</sub>)**

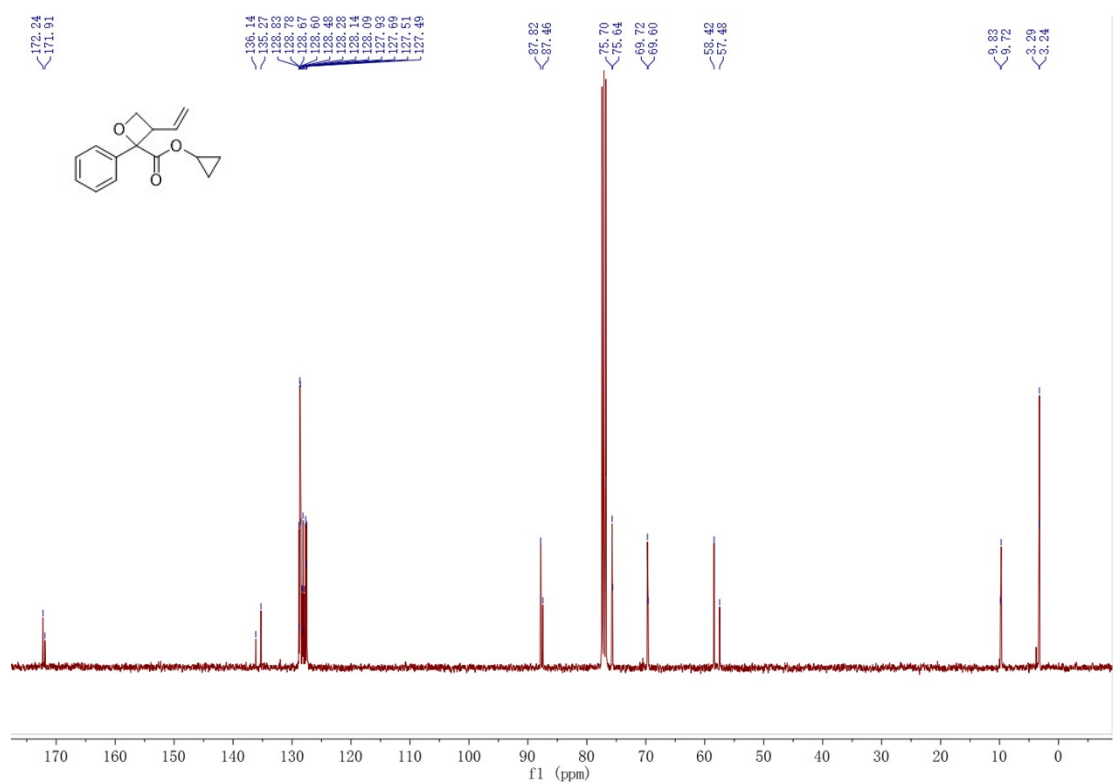

**3ee: <sup>1</sup>H NMR (400 MHz, CDCl<sub>3</sub>)**

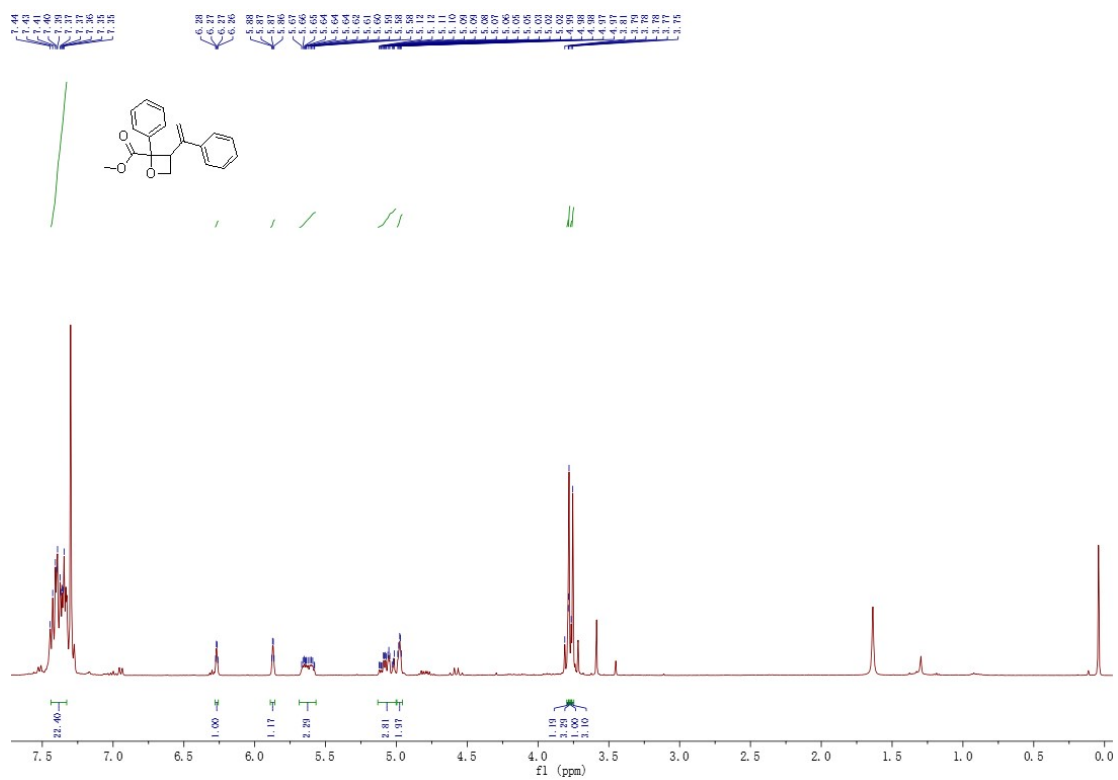

**<sup>13</sup>C NMR (101 MHz, CDCl<sub>3</sub>)**

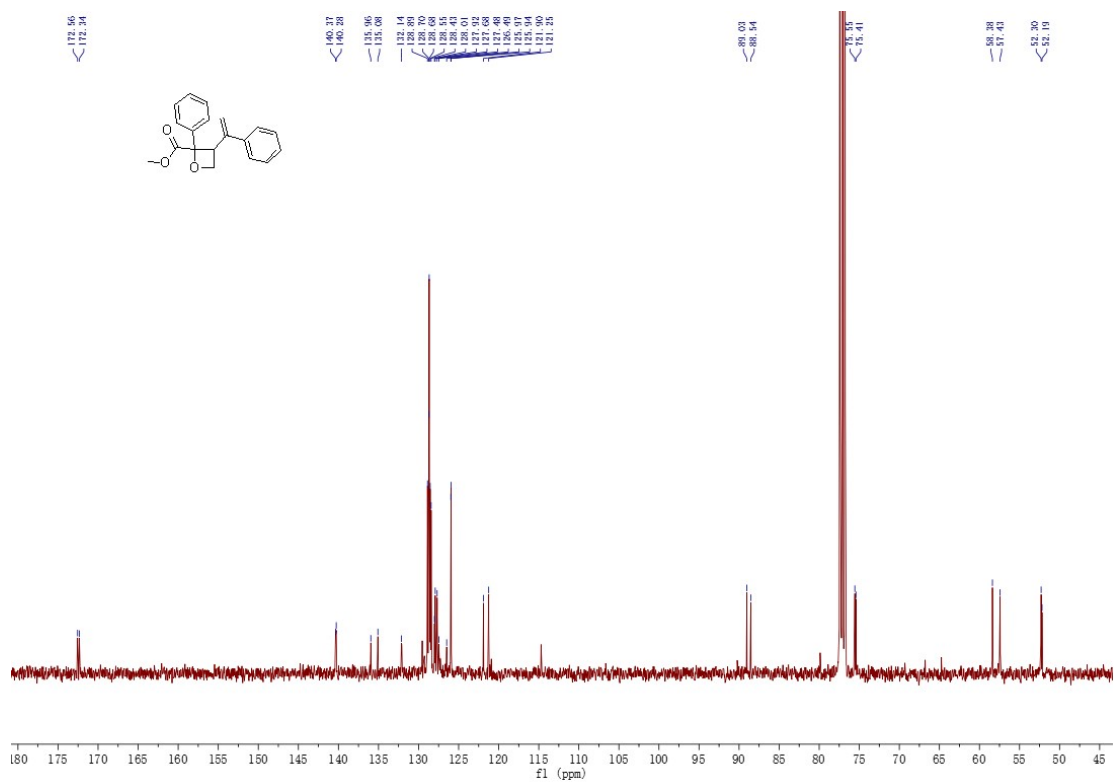

**3ff: <sup>1</sup>H NMR (400 MHz, CDCl<sub>3</sub>)**

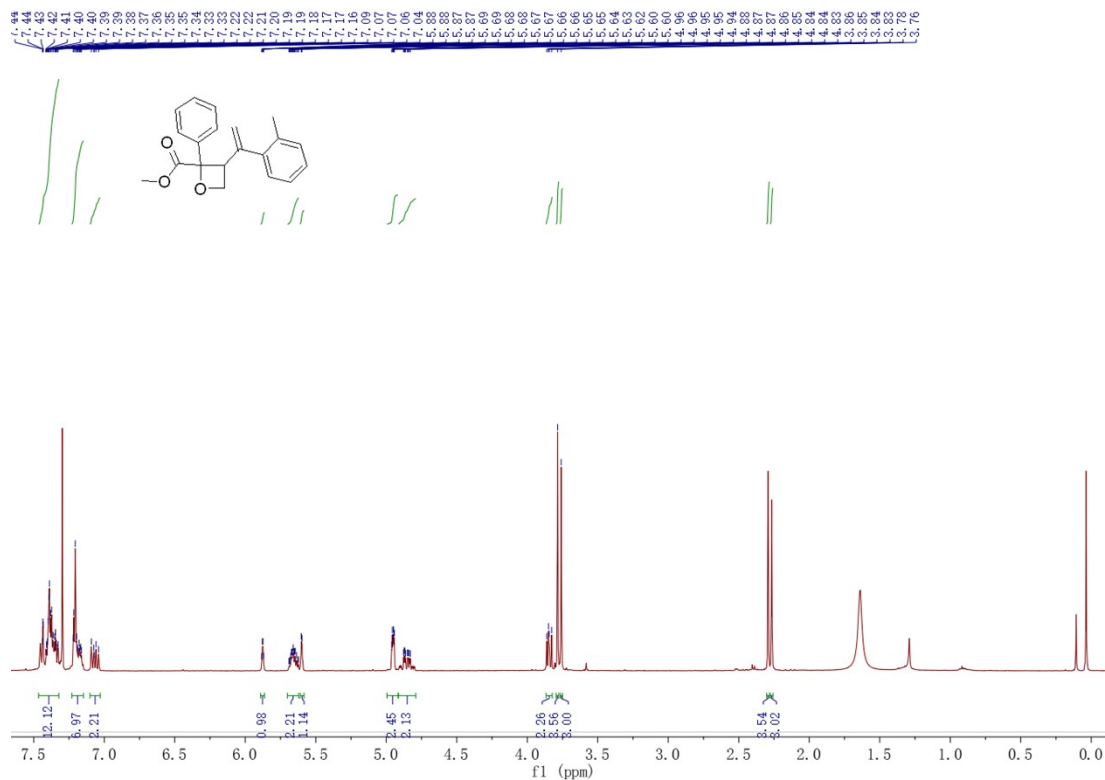

**<sup>13</sup>C NMR (101 MHz, CDCl<sub>3</sub>)**

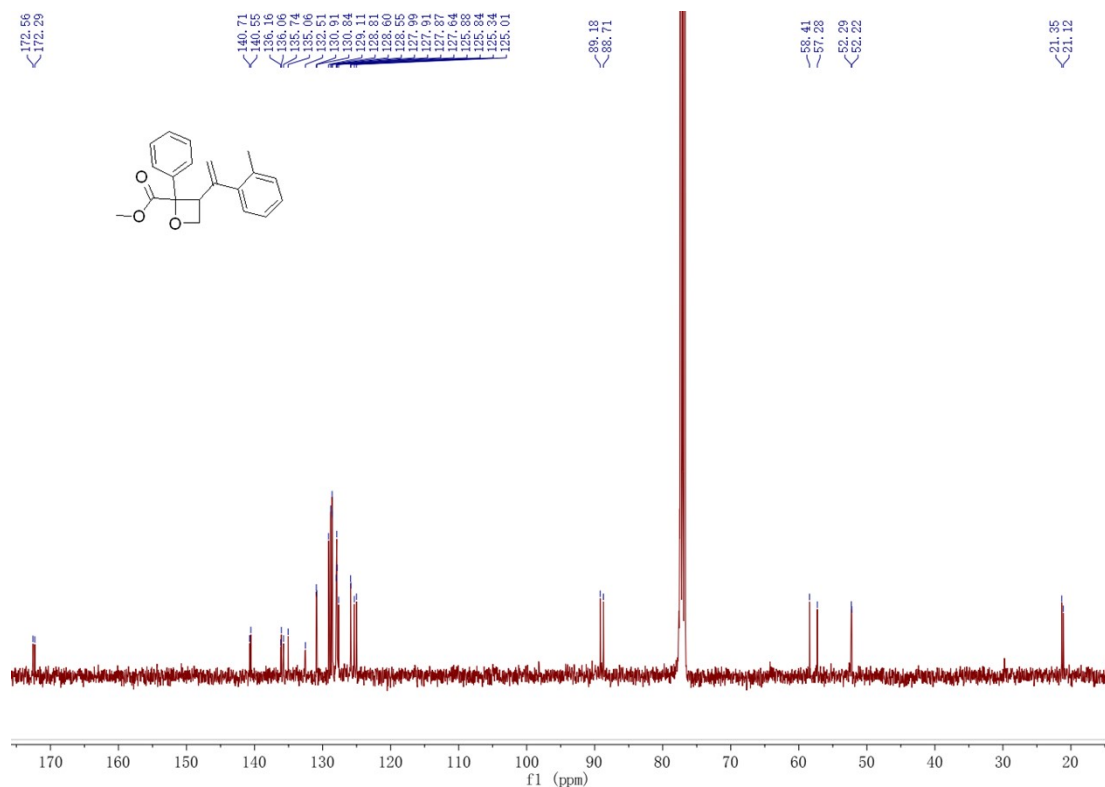

**3gg: <sup>1</sup>H NMR (400 MHz, CDCl<sub>3</sub>)**



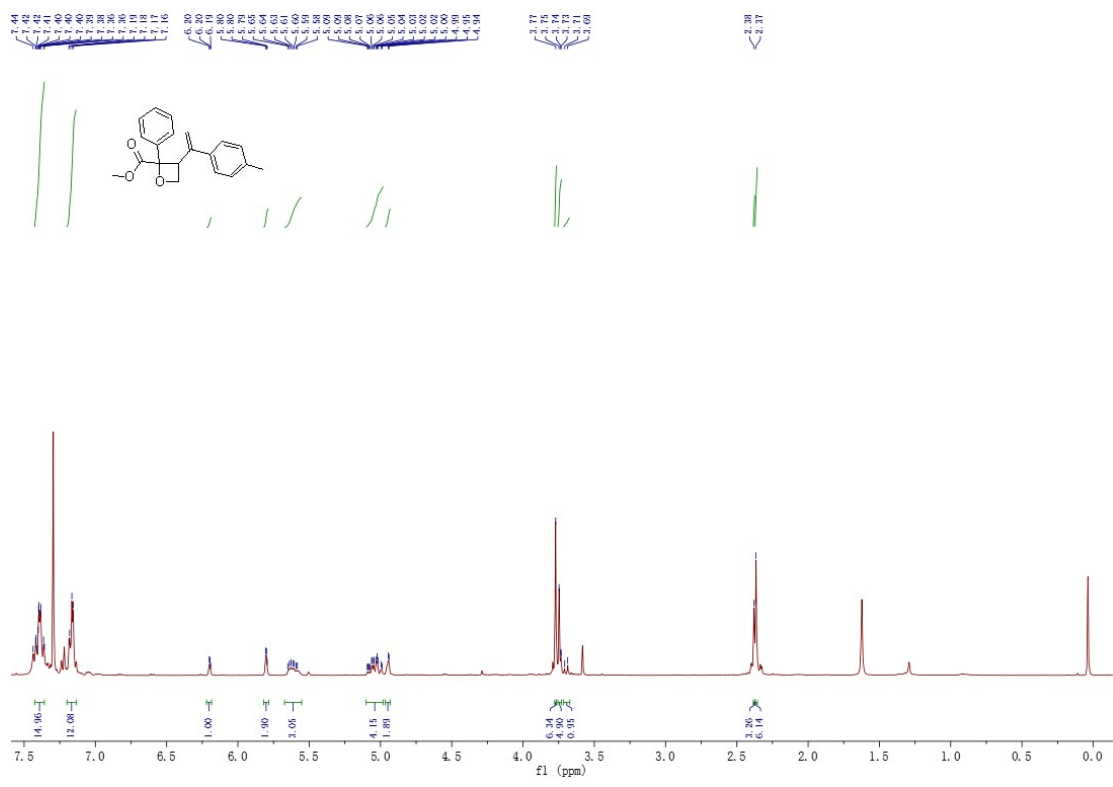

**<sup>13</sup>C NMR (101 MHz, CDCl<sub>3</sub>)**

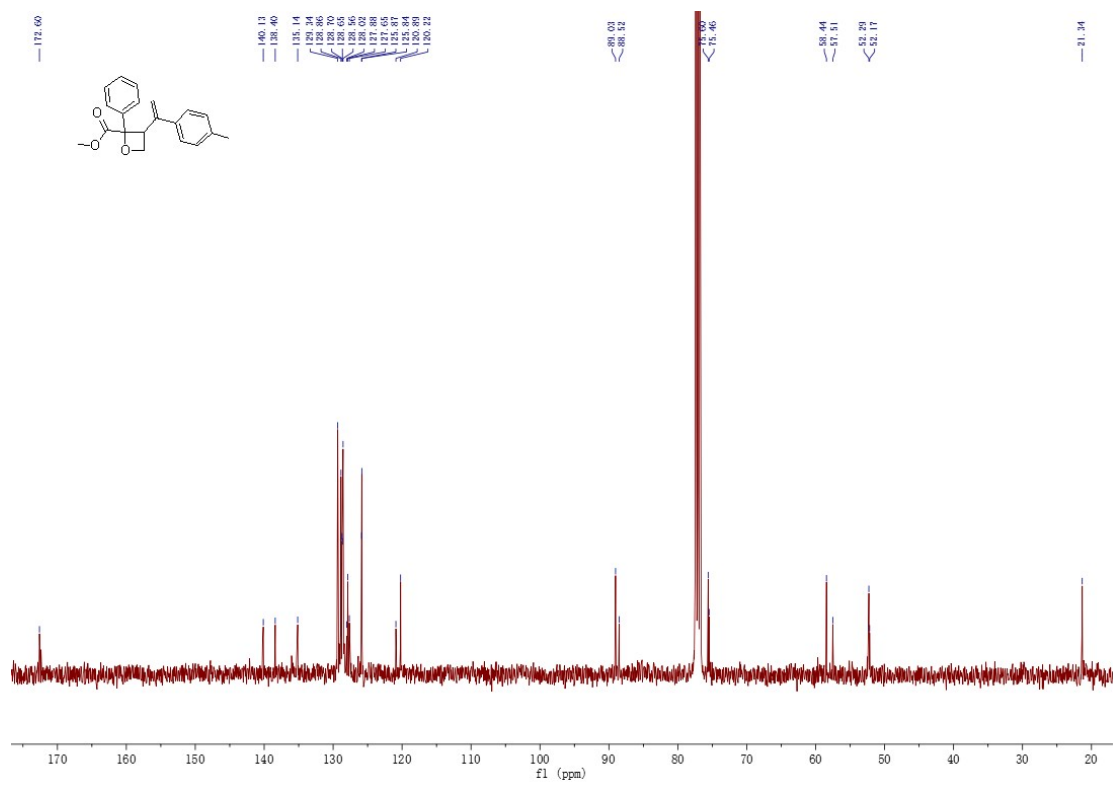

**3hh: <sup>1</sup>H NMR (400 MHz, CDCl<sub>3</sub>)**

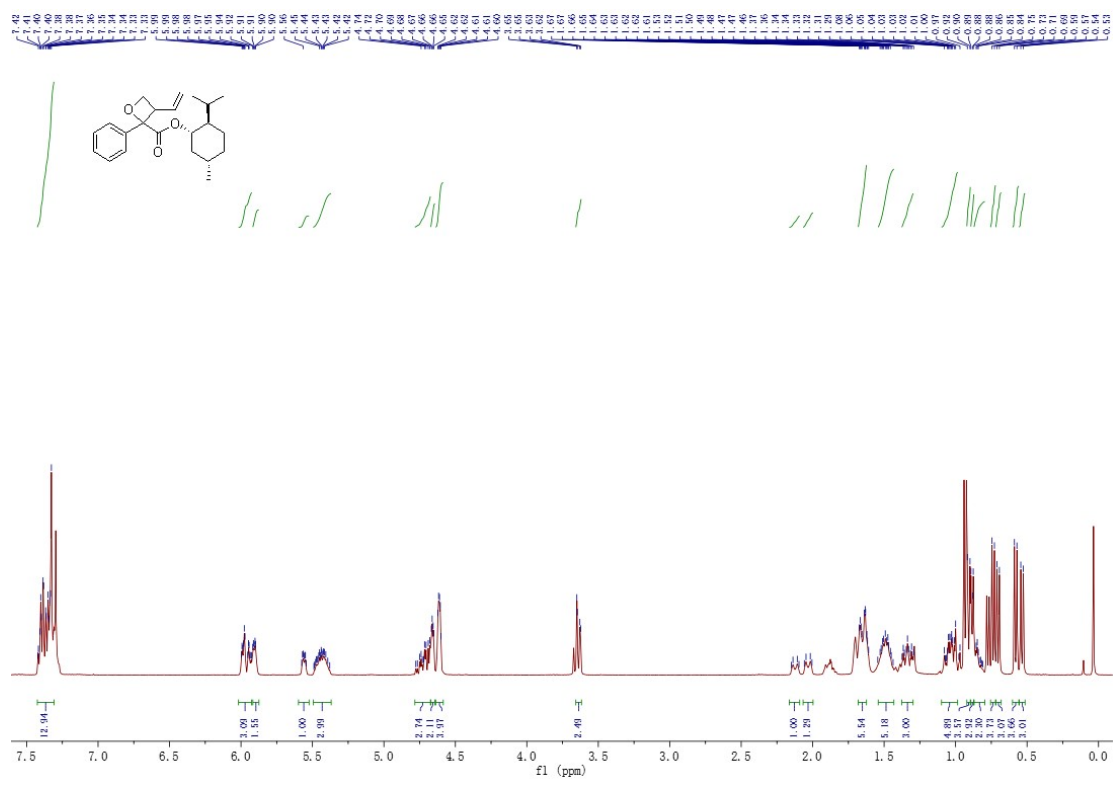

<sup>13</sup>C NMR (101 MHz, CDCl<sub>3</sub>)

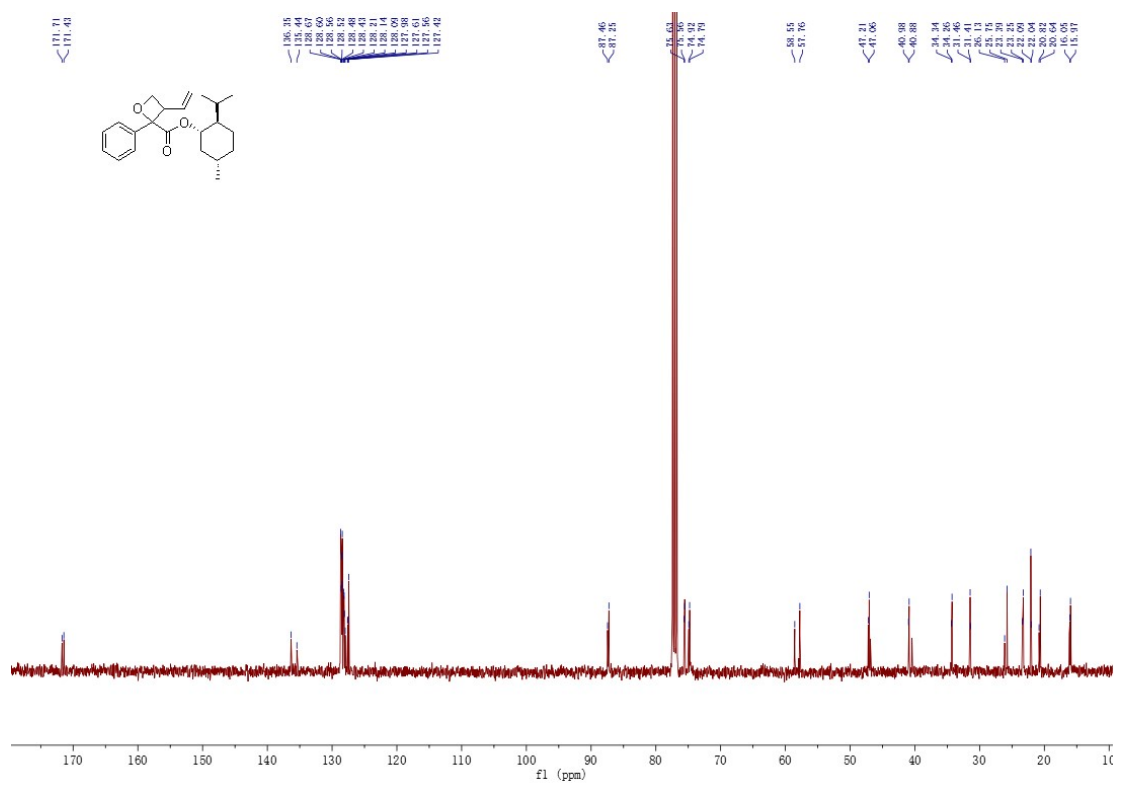

**3ii: <sup>1</sup>H NMR (400 MHz, CDCl<sub>3</sub>)**

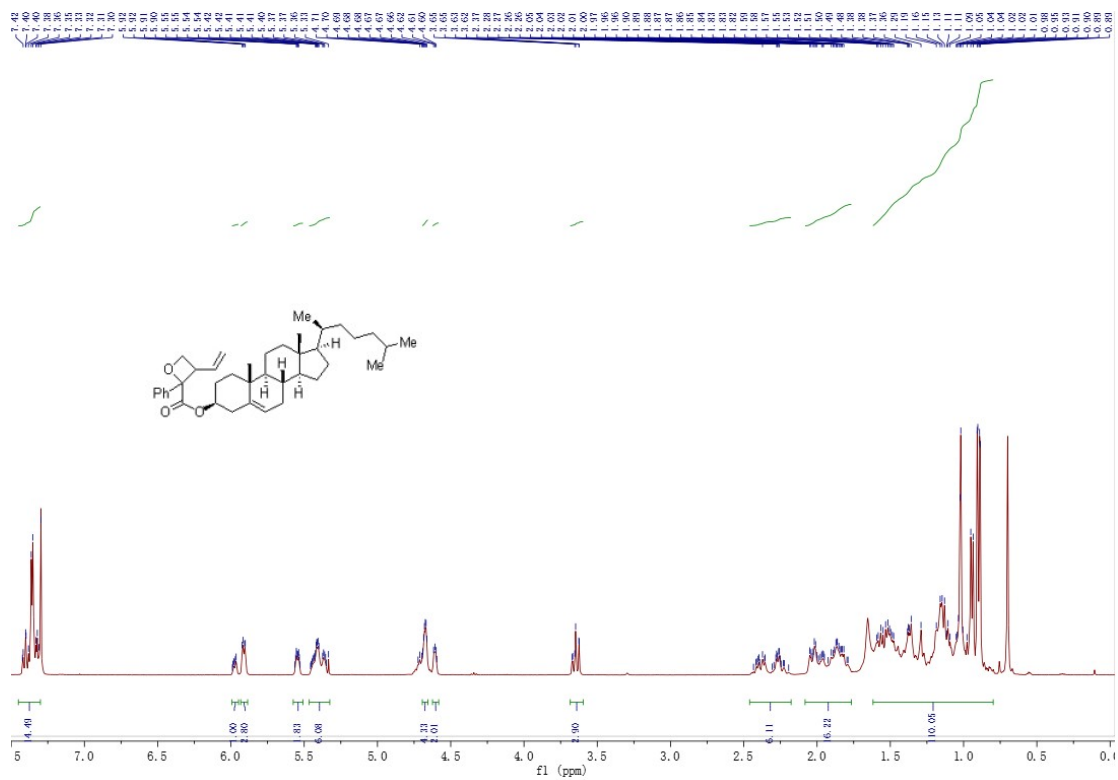

**<sup>13</sup>C NMR (101 MHz, CDCl<sub>3</sub>)**

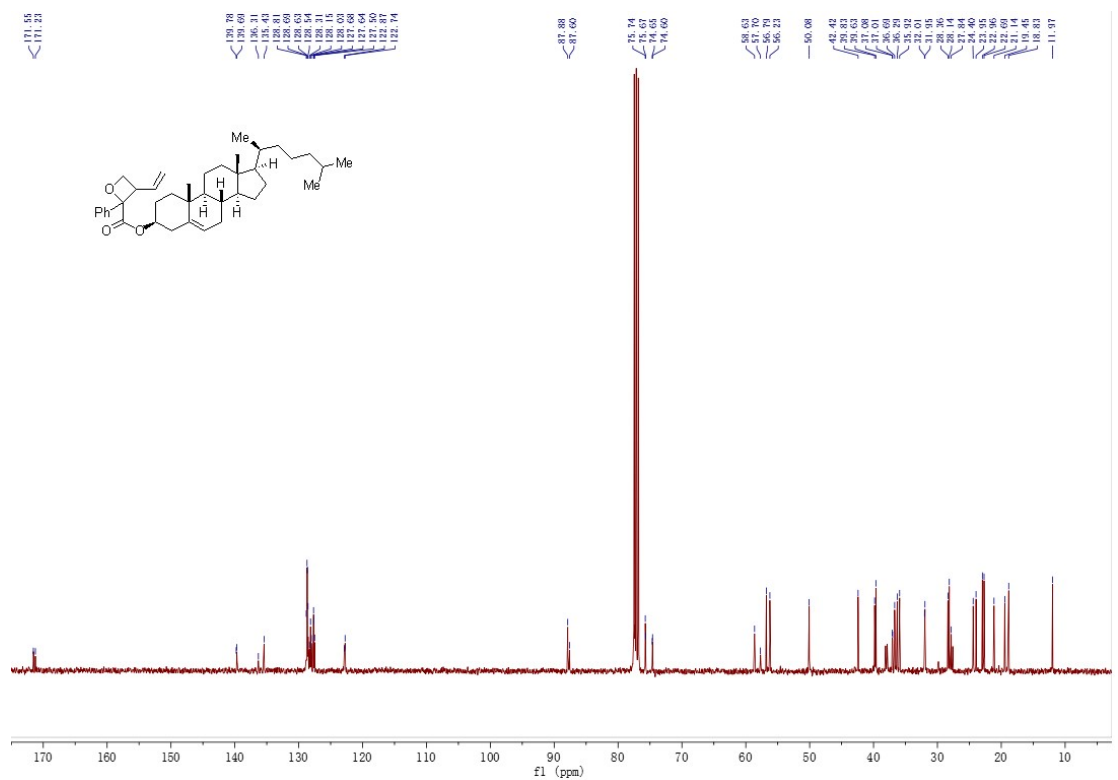

Supplement: d2gc01362b1.pdf [file d2gc01362b1.pdf]
